# Supplementary material for: Probabilistically sampled and spectrally clustered plant species using phenotypic characteristics
Source: PeerJ. 2021 Sep 7;9:e11927. doi: 10.7717/peerj.11927 (PMC8432307; doi:10.7717/peerj.11927)
Supplement: Supplemental Information 1 — Data provided to us by the Soybean Research Institute, Indore, India [file peerj-09-11927-s001.xlsx]

## Sheet: Sheet1
Serial No.	Catlogue No.	Name of Accession	Early plant vigour	Plant height	Number of primary branches	Lodging score	Number of pods per plant	100 seed weight (g)	Seed yield per plant (g)	Days to pod initiation
1	PK 701	PK 701	Poor	54	6.8	Moderate	59.8	6.5	2.5	65
2	PK 1038	PK 1038	Poor	67	3.4	Severe	33	6.2	3.92	64
3	MAUS 41	MAUS 41	Poor	38.4	2.8	Slight	68	6.9	4.36	61
4	TNAU 20024	TNAU 20024	Good	60.8	4	Moderate	34.6	6.1	3	65
5	NRC 43	NRC 43	Good	89.6	5	Severe	32.6	7.3	3.4	62
6	MAUS 17	MAUS 17	Very Good	97.8	5	Severe	38.2	6.9	5.16	65
7	CAT 1428	PK 673	Poor	33.4	5.4	Slight	49.6	10	5.86	61
8	NRC 2006-1-2	NRC 2006-1-2	Good	30.2	3.8	Slight	41	9.8	6.58	45
9	EC 251682	EC 251682	Poor	49.6	4.8	Slight	59.2	10.3	5.28	62
10	EC 14117	EC 14117	Poor	31.2	4.4	Slight	29.6	12	7.26	58
11	EC 457174	EC 457174	Poor	25.8	6.4	Slight	44.6	13.5	10.86	55
12	CAT 1385	PI 283327	Poor	37.4	4.8	Slight	84.6	10.7	19.78	55
13	PK 1243	PK 1243	Poor	78.8	7.4	Severe	49.2	7.1	4.9	68
14	CAT 3229	EC 590224	Very Good	39.8	4	Slight	80.4	8.2	5.06	55
15	EC 251513	EC 251513	Poor	58.6	5.6	Severe	42.4	5.5	2.1	65
16	NRC 95-06-03	NRC 95-06-03	Poor	53.4	4.8	Slight	33	7.5	1.46	58
17	L 324	L 324	Good	92	4.6	Slight	35.8	6.1	2.72	64
18	PKS 7	PKS 7	Poor	70.6	6.6	Severe	54	5.4	3.6	69
19	MAUS 109	MAUS 109	Very Good	81.8	4.2	Moderate	22.4	6.9	6.84	69
20	JS 20-72	JS 20-72	Poor	37.6	4.8	Slight	47	10.5	9.4	48
21	WT 89	WT 89	Very Good	72	3.6	Severe	31.8	3.8	5.48	67
22	JS 94-67	JS 94-67	Poor					10.3	5.58	55
23	DS 97-12	DS 97-12	Poor	57.2	5.8	Severe	60.2	7.2	6.34	63
24	JS 95-98	JS 95-98	Poor	64.2	6.2	Severe	48.8	6.3	3.88	71
25	CAT 357	EC 232019	Poor	57	5	Moderate	79.4	8.6	5.6	62
26	JS(SH) 90-91	JS(SH) 90-91	Poor	65.8	5.2	Moderate	92.4	6.6	3.76	55
27	JS 20-52	JS 20-52	Very Good	53.6	4.2	Slight	30.6	8.4	5.18	61
28	G 11	G 11	Poor	41.2	5.8	Slight	67.6	9.6	10.42	59
29	NRC 82	NRC 82	Poor	28.5	4.5	Slight	49.5	7.5	1.72	58
30	MAUS 132002	MAUS 132002	Good	91	6.6	Severe	66.6	6.5	2.62	61
31	NRC 1	NRC 1	Poor	53.4	6	Moderate	62.6	6.5	3.58	68
32	NRC 2006 M	NRC 2006 M	Poor	41.4	3.6	Slight	81.8	10.3	15.06	58
33	NRC 76	NRC 76	Poor	57.2	5.8	Severe	68.2	5.8	2.68	66
34	UPSL 257	UPSL 257	Good	81.4	4	Slight	56.4	6.8	3.88	73
35	ND 47	EC 18745	Poor	59.2	6.2	Moderate	136	6	4.4	71
36	TNAU 5-55	TNAU 5-55	Very Good	62	3.8	Severe	27.8	5.8	2.8	62
37	JS 79-302	JS 79-302	Very Good	71.2	5.2	Slight	23.6	7.2	1.72	71
38	PK 431337	PK 431337	Very Good	73.25	3.25	Slight	58.25	9.5	5.12	58
39	SKY/AK 1403	SKY/AK 1403	Good	49.6	4.2	Slight	70	13.4	14.86	62
40	VGM 70	VGM 70	Poor	43.6	3.8	Slight	32.8	6.2	1.3	66
41	JS(SH) 91-93	JS(SH) 91-93	Poor	63.2	5.8	Severe	41.4	6.9	3.64	67
42	JS 20-34	JS 20-34	Poor	24.4	4.4	Slight	23.2	13.7	6.28	39
43	JS 20-23	JS 20-23	Good			Slight		14	6.22	46
44	45 JAB	45 JAB	Very Good	60	5.7	Severe	73	7.9	8.6	55
45	CAT 1434	PK 768	Poor	24.6	6.2	Slight	83.4	9.1	14.34	57
46	CAT 164	B 327	Poor	30.6	4.2	Slight	43	9.5	7.54	51
47	MAUS 59	MAUS 59	Very Good	55.2	3.6	Severe	42.2	6.3	3.42	62
48	P 112	P 112	Good	69.4	5.8	Severe	44.2	7.6	1.66	64
49	JS 20-75	JS 20-75	Very Good	47.8	5	Slight	71	9.5	12.44	58
50	NRC 2008-GI-8-2	NRC 2008-GI-8-2	Poor	60	6.6	Slight	110.6	6.1	4.6	59
51	JS 20-48	JS 20-48	Poor	25.4	5	Slight	62.6	10.1	12.8	58
52	CSB 0808	CSB 0808	Poor	45.2	5.6	Slight	67	6.6	3.34	62
53	IC 38220	IC 38220	Poor			Slight		10.1	4.68	59
54	JS 20-55	JS 20-55	Poor	17.3333	4.66667	Slight	58.3333	10.1	2.96	58
55	JS 20-54	JS 20-54	Poor	40	5.8	Slight	104.2	11.3	12.92	56
56	CO 2	CO 2	Poor	24.4	2.8	Slight	35.4	6.4	1.5	54
57	EC 39536	EC 39536	Poor	52.4	3.8	Severe	32.8	7.3	1.86	65
58	CAT 514	EC 251358	Very Good	74	3.6	Slight	41	7	4	51
59	CAT 340	EC 175317	Poor	22	6	Slight	82	6.5	1.3	55
60	TNAU 20049	TNAU 20049	Poor	74.4	6.2	Severe	79	6.7	1.98	67
61	JS 20-35	JS 20-35	Poor	29.6	5	Slight	47.2	11.5	9.6	48
62	CAT 2703	EC 481506	Good	74.8	4.4	Severe	42.4	6.7	1.88	67
63	CAT 2502	EC 467282(A)	Very Good	74.4	2.6	Severe	34.8	6.6	3.8	55
64	JS 98-63	JS 98-63	Poor	45.8	7.2		88.8	11.4	17.96	57
65	PK 1014	PK 1014	Poor	56.4	4.2	Moderate	57.4	6.7	4.28	68
66	JS 20-20	JS 20-20	Poor	21.2	3		33.4	14.2	6.48	45
67	JS(SH) 93-37	JS(SH) 93-37	Poor	51.8	7.8	Severe	132.2	7.6	10.06	58
68	JS 20-61	JS 20-61	Very Good	58.8	5.4	Slight	59.8	15.1	13.96	51
69	JS 20-30	JS 20-30	Good	38.2	6.8	Slight	76.6	10.1	16.86	51
70	CAT 780	EC 333876	Poor	30.6	7.6	Slight	74.2	8.2	5.38	50
71	TNAU 20056	TNAU 20056	Poor	59.4	6.2	Severe	61.4	6.5	0.98	71
72	CAT 1263	MACS 54	Poor	46.2	4.4	Severe	25	6.5	1.92	68
73	CAT 2667	EC 481436	Poor	71.6	6.8	Severe	67	7.4	7.62	65
74	CAT 1545	T 87-39	Good	87.2	4	Moderate	46.8	6.9	2.86	62
75	JS 97-52	JS 97-52	Good	47	4.4		58.8	8.8	8.36	58
76	T 49	T 49	Good	83.6	5	Moderate	26.8	8.7	3.32	69
77	CAT 1191	JS 81-312	Very Good	57.4	4.8	Slight	28.8	7.6	2.8	60
78	TNAU 20051	TNAU 20051	Very Good	55	5.4	Moderate	65.2	6.8	5.58	65
79	43 JAB	43 JAB	Poor	37.2	5	Slight	68	13.1	12.9	52
80	EC 15961	EC 15961	Very Good	60.6	3	Severe	22.4	5.3	5.44	64
81	MAUS 60	MAUS 60	Very Good	65.6	5.2	Severe	50.6	6	3.66	61
82	MACS 565	MACS 565	Very Good	57.4	5.2	Severe	51	6.2	3.28	64
83	CSB 0809	CSB 0809	Poor	71.8	8.4	Severe	123.4	5.8	0.9	69
84	MACS 1039	MACS 1039	Poor	33.2	5.8	Slight	48.6	6.4	2.24	58
85	MAUS 2	MAUS 2	Good	54.8	4.8	Severe	58.4	6.1	5.2	64
86	CAT 1203	KB 16	Good	82.8	4.2	Severe	85.4	6.6	6.2	64
87	PK 1303	PK 1303	Poor	27.5	5.5	Slight	93.5	6.3	2.26	57
88	JS 90-21	JS 90-21	Poor	49.2	7.2	Moderate	92.2	6.2	3.7	62
89	DSB 12	DSB 12	Poor	44.4	2	Slight	27.4	7.5	4.48	51
90	G 688	G 688	Poor	24.4	2.4	Slight	37.8	9	4	56
91	F4 P20	F4 P20	Good	42.8	3.4	Slight	38	7.7	5.22	62
92	KB 97	KB 97	Good	34.8	4	Moderate	46	7	2.76	67
93	JS 99-12	JS 99-12	Poor	49.6	4.4	Moderate	43.6	7.6	2.72	66
94	NRC 2396	NRC 2396	Good	40.8	5.6		61.6	12.3	10.8	50
95	AVRDC 508	AVRDC 508	Very Good	65.6	2.8	Severe	62.4	7.2	7	62
96	KB 249	KB 249	Poor	32.8	3.6	Slight	75.4	9.5	11.94	56
97	ANKUR	ANKUR	Poor	21.8	2.8	Slight	48.6	9.9	3.62	58
98	WC 67	WC 67	Good	60	5.6	Severe	42.2	7.8	4.18	62
99	JS 98-02	JS 98-02	Good	52.8	5.6	Severe	45.6	6.8	1.32	63
100	JS 20-21	JS 20-21	Poor	23.5	2.75	Slight	45.5	7.3	0.52	51
101	41 JAB	41 JAB	Poor	31.3	4	Slight	37.2	9.3	5.1	54
102	JS 89-24	JS 89-24	Very Good	51	3.4	Slight	43.2	6.7	4.62	64
103	SIZTA 194	SIZTA 194	Poor	53.4	3.8	Slight	59.6	9.3	4.9	59
104	JS 20-29	JS 20-29	Poor	35	6	Slight	52.8	13.4	13.34	57
105	MACS 1045	MACS 1045	Poor	26	8.6	Slight	46.2	8.2	4.76	63
106	CAT 2641	EC 481355	Poor	62.8	7.4	Moderate	75.2	5.5	3.16	71
107	G 828	G 828	Poor	38	3.6	Slight	63.2	8.2	5.08	57
108	PRATAP SOYA	PRATAP SOYA	Poor	27.2	4.8	Slight	38.4	8.7	3.78	55
109	CAT 3174	EC 572160	Poor	33	3.8	Slight	74.6	7.8	5.1	60
110	CAT 148	AMSS 34	Poor	55.8	3.6	Slight	76.6	6.9	8.4	62
111	WC 37	WC 37	Good	47.4	5.6	Slight	35.6	5.9	1.74	67
112	CAT 324	EC 15656	Poor	62.2	5.8	Severe	10.8	6.1	1.8	63
113	JS 20-01	JS 20-01	Poor	42.75	5	Slight	32.5	11.8	6.76	56
114	JS 99-72	JS 99-72	Poor	53.4	4	Moderate	91.2		0	67
115	CAT 1885	TGX 859-9A	Good	60.6	7.8	Moderate	43.8	7.1	1.98	64
116	NRC 21	NRC 21	Good	65.8	3.8	Very severe	60.4	7.3	2.52	66
117	PK 1171	PK 1171	Good	34.6	4.8	Slight	45.8	9.1	6.68	64
118	CAT 1965	WT 150	Poor	22.4	6	Slight	46.6	7.8	4.16	63
119	G 03	G 03	Poor	44	5.2	Slight	60.6	6.2	2	69
120	NRC 25	NRC 25	Poor	31.4	3.6		51.6	6.4	1.58	71
121	EC 15966	EC 15966	Poor	21	3	Slight	35	8.4	3.18	57
122	SANTA MARIA	SANTA MARIA	Poor	62.2	3.6	Moderate	31.2	6.1	0.76	71
123	PK 262	PK 262	Poor	23.4	6.8	Slight	41.4	7	3.66	55
124	JS 90-29	JS 90-29	Poor	50.8	3.8	Severe	37.4	6.5	2	67
125	UGM 77	UGM 77	Poor	30.8	8.4	Slight	99.6	6.6	3.36	68
126	MACS 7102	MACS 7102	Poor	21.8	6.2	Slight	88.6	9.1	7.12	55
127	NRC 41	NRC 41	Poor	25.4	6	Slight	48	8.5	1.6	56
128	DS 24110	DS 24110	Good	57	4.2	Moderate	73.4	7	3.2	66
129	JS 20-60	JS 20-60	Poor	27	4.4	Slight	56.8	11.3	10.66	53
130	JS 20-41	JS 20-41	Good	32.2	3.2		25	10	4.32	51
131	JS(SH) 2002-14	JS(SH) 2002-14	Poor	20	4	Slight	63	7.1	1.52	62
132	MACS 1188	MACS 1188	Poor	33	4.2	Slight	76.2	7.3	6.94	59
133	NRC 2320	NRC 2320	Good	37	3.6	Slight	40.2	10.5	7.7	55
134	PK 25	PK 25	Good	67	3.6	Severe	33.8	6.8	4.86	69
135	G 83	G 83	Poor	24.4	4.6	Slight	32.8	9	3.48	50
136	UGM 70	UGM 70	Poor	63.6	6.2	Severe	75.6	6.1	3	69
137	TRAIT SP. HARDER	TRAIT SP. HARDER	Good	55.6	4.2	Slight	41.4	12.6	9.82	62
138	MAUS 55	MAUS 55	Poor	49	3.6	Moderate	56.2	6.5	2.48	69
139	CAT 1437	PK 885	Poor	32.8	4.4	Slight	41.2	11	5.96	55
140	NRC 2755	NRC 2755	Poor	21.75	3		29.75	12.9	2.44	56
141	G 141	G 141	Very Good	57.6	2.2	Moderate	23.2	6.6	2.46	65
142	NRC 2007-1-3	NRC 2007-1-3	Very Good			Moderate		8.4	4.8	64
143	CAT 492 B	EC 250608	Very Good	56.8	3.4	Slight	54.2	6.4	3.68	57
144	SL 794	SL 794	Poor	47.5	6.5	Moderate	175	6.9	6.04	62
145	SHILAJIT	SHILAJIT	Poor	27	3.2	Slight	45.2	8.4	7.28	50
146	JS 96-31	JS 96-31	Poor	34	4.6	Slight	50.6	9.7	7.64	57
147	JS 98-97	JS 98-97	Good	77.6	4	Severe	51.6	6	3.82	64
148	MONETTA	MONETTA	Poor	20.6	3.8	Slight	38.6	9.2	5.12	50
149	CAT 3336	EC 615137	Poor	18.5	0	Slight	8.5		0	41
150	SL 752	SL 752	Good	60.8	3	Slight	41.6	6	4.28	62
151	CAT 1682	TGX 560-20D	Good	73.6	3.2	Severe	34.4	6.1	2.18	71
152	CAT 2603	EC 481306	Poor	34.2	3.8	Slight	36.8	7.2	4.34	40
153	IC 13051	IC 13051	Good	62.4	4	Slight	40	8.3	4.1	58
154	AMS 19 B	AMS 19 B	Poor	30.8	4	Slight	70.6	10.2	12.52	58
155	JS 20-27	JS 20-27	Good	26.8	2.4	Moderate	15.6	11.1	2.38	50
156	MAUS 7107	MAUS 7107	Good	51	4.2	Slight	109.6	6.5	10.06	66
157	JS 20-31	JS 20-31	Very Good	46.6	3.2	Moderate	54.4	8.9	8.74	60
158	NRC 42	NRC 42	Very Good	72	3.4	Slight	53.4	7.4	2.88	62
159	AVRDS 5	AVRDS 5	Good	38.8	3.2	Severe	33.6	5.6	3.6	66
160	NRC 2007 A	NRC 2007 A	Poor	42	3.2	Slight	44.4	6.5	4.56	60
161	NRC 2346	NRC 2346	Poor	20.6	2.6	Slight	32.6	13.6	3.96	58
162	MAUS 164	MAUS 164	Poor	22.4	3	Slight	30.6	9	3.64	57
163	G 620	G 620	Poor	27.2	3.8	Slight	43.6	11.2	10	56
164	IC 437079	IC 437079	Poor	20.2	1.6	Slight	20.4	9.2	4.08	54
165	UGM 75	UGM 75	Poor	25	3.8		30	6.5	2.52	66
166	CSB 0806	CSB 0806	Poor	27.6	5.2	Slight	70.2	8.8	6.72	58
167	EC 24091	EC 24091	Good	42.4	3.6		64.6	8.8	6.12	56
168	AMSS 44	AMSS 44	Very Good	45.6	2.4	Slight	14.8	9.3	3.56	51
169	CAT 1454	PLSO 79	Good	55.8	3.4	Moderate	49.2	9.4	5.02	58
170	PP6	PP6	Good	41.8	1.8	Slight	25.2	9.7	4.06	45
171	MAUS 34	MAUS 34	Good	54.8	4.4	Moderate	65.8	6.3	6.04	64
172	JS 20-38	JS 20-38	Poor	18.6	3.2	Slight	36	11.3	7.58	48
173	CAT 902	EC 39573	Very Good	52	1.8	Severe	30.6	6.1	2.08	56
174	CAT 2353	EC 457120	Poor	25.2	2.8	Slight	22.4	12.5	4.1	52
175	CAT 883	EC 39048	Poor	51.6	4.4	Slight	41.2	6.4	2.88	64
176	JS 20-51	JS 20-51	Very Good	51.4	3	Slight	44.8	11	9.6	58
177	JS 20-50	JS 20-50	Poor	36.8	3.8	Slight	42.4	10.1	7.52	62
178	JS 20-79	JS 20-79	Very Good	45.2	3		45.2	9.9	10.6	58
179	PSL 6	PSL 6	Very Good	46	4.8	Moderate	106.2	6	6.46	66
180	JS 99-76	JS 99-76	Good	52.2	3.2	Slight	35.8	5.7	3.08	62
181	MAUS 94-02	MAUS 94-02	Poor	51	4	Severe	55.4	6.5	1.66	71
182	PUSA 97-03	PUSA 97-03	Poor	47.6	5.8	Moderate	87.2	8.1	7.2	58
183	CAT 1199	KALITUR	Good	61.8	3.8	Severe	44.6	5.8	3.42	66
184	CAT 1416	PK 472	Poor	19.4	4.4	Slight	50.8	7.5	4.14	60
185	LSB 23	LSB 23	Poor	19.4	4	Slight	35.8	5.5	3.44	57
186	PK 122	PK 122	Poor	25.6	3.2	Slight	46	7.3	4.96	58
187	CAT 2547	EC 468563	Poor	33	8	Slight	40	10.2	0.64	63
188	G 91	G 91	Good	43.6	2.8	Moderate	59.4	6.3	2.08	66
189	CAT 2636	EC 481348	Good	37	3.6	Severe	58.2	5.5	4.96	45
190	CAT 3034	EC 572020	Good	21.3333	1.66667		23.3333	11.3	0.36	37
191	CAT 66	AGS 193	Good	61	4.4	Severe	72.8	8.1	3.66	62
192	CAT 2649	EC 481366	Poor	40.2	4	Severe	46.2	4.5	4.16	44
193	CAT 49	AGS 157	Poor	32.6667	4	Slight	81.6667	5.8	2.88	64
194	CAT 49 B	AGS 157	Very Good	42.2	3.8		62.8	6.4	6.94	62
195	CAT 3293	EC 602288	Poor	22.2	3.8	Slight	72.8	7.4	4.74	57
196	IC 49685	IC 49685	Poor	23.8	3.8	Slight	59.4	9.5	3.32	58
197	MACS 693	MACS 693	Poor	69.4	4.2	Moderate	79.6	5.6	2.92	66
198	DS 98-02	DS 98-02	Very Good	51	3.6	Severe	29	6.6	1.46	63
199	CAT 3243	EC 592195	Very Good	65	2.4	Slight	33.6	7.7	2.02	56
200	CAT 1113	IC 4882	Good	65.8	3.6	Slight	31.6	8.9	5.46	63
201	CAT 1113 A	IC 4882	Very Good	79.25	2.75	Severe	29.75	9	4.16	62
202	CAT 1113 B	IC 4882	Very Good	64	2.2	Severe	57	8.9	8.38	62
203	CAT 170	B 460	Poor	36	5.8	Slight	49	8.8	7.62	53
204	CAT 1487	RICUM	Very Good	70.6	2.4	Moderate	19.4	8.2	1.32	57
205	TNAU 20022	TNAU 20022	Very Good	61.4	3.6	Severe	44.4	6.1	2.94	65
206	CAT 2652	EC 481369	Very Good	45.4	2.4	Moderate	29.4	6	3.74	37
207	CAT 209	BS 2	Poor	27.8	6.2	Slight	66.8	7.3	4.64	57
208	CAT 1042	IC 15681	Good	49.6	2.4	Moderate	20.8	9.2	2.34	65
209	CAT 2574	EC 478225 A	Very Good	78.8	4	Severe	30	7.5	1.84	63
210	CAT 2707	EC 481515	Poor	44.6	3.8	Moderate	62.6	9.3	4.18	57
211	CAT 905	EC 39751	Very Good	51.2	3.6	Moderate	43	9.1	9.2	49
212	MAUS 414	MAUS 414	Very Good	60.8	4	Severe	73.4	7.4	3.42	62
213	MAUS 149	MAUS 149	Good	30	3.8	Slight	22.6	7.8	2.18	51
214	MAUS 701	MAUS 701	Good	36.4	4.2	Slight	37	7.2	3.52	55
215	NRC 79	NRC 79	Poor	31.5	6	Slight	84.5	6.7	3.94	60
216	CAT 2562	EC 468600	Good	44	3.4	Slight	48	6.6	3.52	55
217	NRC 34	NRC 34	Poor	40.8	5	Severe	45.4	6.7	3.8	68
218	AMCS 715	AMCS 715	Poor	84	4	Moderate	39.6	7.8	0.76	67
219	CAT 1349	PI 170890	Very Good	82.6	4.2	Moderate	64.8	6.7	3.72	71
220	PK 63	PK 63	Poor	40.2	4.8	Slight	35.6	7.4	3.04	60
221	CAT 891	EC 39376	Poor	29	3.8	Slight	46	8.3	4.12	51
222	JSM 272	JSM 272	Good	20.3333	3.66667	Slight	46.3333	10.6	3.82	58
223	CAT 3284	EC 602272	Poor	30	4		40.2	11	9.22	54
224	CAT 2629	EC 481338	Poor	48.4	5.6	Severe	115.6	5.4	8.64	71
225	CAT 195	BR 4	Poor	24.8	4	Slight	35	7.9	3.48	51
226	GP 503	GP 503	Poor	51.4	5.4	Slight	62.2	7.7	3.28	59
227	GP 57	GP 57	Poor	36.8	9	Slight	88.4	8.5	6.28	60
228	GP 525	GP 525	Very Good	46.4	2.2	Moderate	24.2	9.2	2.06	58
229	VLS 62	VLS 62	Good	36	4.2	Slight	32.6	8.6	5.78	54
230	AGS 32	AGS 32	Very Good	41.6	4.4		52	6	4.76	57
231	SL 599	SL 599	Poor	24.8	4.8	Slight	84.2	10.5	14.66	62
232	AGS 129	AGS 129	Good	40.4	3.2	Slight	44.2	9.4	4.26	56
233	LEE 75	LEE 75	Good	34	4.4	Slight	33	8	2.74	60
234	PS 1450	PS 1450	Good	31.2	5	Slight	50.4	11.9	6.18	50
235	PS 1225	PS 1225	Poor	44.6667	4	Slight	59.6667	9.7	3.06	58
236	LEE 54	LEE 54	Good	56.8	3.4	Slight	48.2	7.6	4.62	57
237	AMS 195	AMS 195	Very Good	30	5.8	Slight	41.4	9.2	7.88	55
238	PS 19	PS 19	Poor	29.6	3.6	Slight	22.4	8.6	2.26	51
239	AMS 25-5-1	AMS 25-5-1	Good	27.2	3.2		43.8	10.2	10.56	58
240	JSM 245	JSM 245	Poor	28.2	4.8	Slight	67.2	9.3	13.8	58
241	GP 533	GP 533	Poor	43.4	5.4	Slight	43		0	60
242	SL 459	SL 459	Poor	22	4.6	Slight	31.8	8.5	5.22	55
243	AMS 39-2-2	AMS 39-2-2	Good	34.8	3.6	Slight	52.4	6.7	3.84	57
244	GP 465	GP 465	Good	33.8	3.6	Slight	39.8	10.2	7.38	60
245	GP 430	GP 430	Poor	67.8	2.8	Slight	39.8	7.9	2	67
246	GP 447	GP 447	Good	41	4.2	Slight	24.6	11.7	5.5	55
247	GP 486	GP 486	Very Good	53.2	4.2	Moderate	36.2	6.7	2.42	65
248	JSM 240	JSM 240	Poor	29.3333	4.33333	Slight	62.6667	11.2	4.94	53
249	JSM 232	JSM 232	Poor	41.8	6.4	Slight	90.6	11.5	16.12	60
250	GP 535	GP 535	Poor	15	2.8	Slight	26	11.3	4.34	49
251	JSM 258	JSM 258	Poor	31	7.4		48.6	12.6	11.98	53
252	JSM 185	JSM 185	Poor	28	9	Slight	131		0	59
253	GP 550	GP 550	Very Good	48.2	4	Slight	28.8	6.4	2.52	60
254	AMS 100-16-4-1-3	AMS 100-16-4-1-3	Poor	36.4	6	Slight	61.6	7.1	3.44	58
255	GP 568	GP 568	Poor	41	7	Slight	25		0	71
256	GP 545	GP 545	Good	62.4	6.4	Severe	56.8	5.6	3.12	67
257	LEE 46	LEE 46	Good	67.8	4.6		37.6	6.8	4.64	65
258	SL 682	SL 682	Poor	51.2	5.2	Severe	40.8	5.2	3.9	69
259	TNAU 20023	TNAU 20023	Poor	53.2	6.4	Slight	56	5.1	6.76	64
260	EC 7048	EC 7048	Good	29.6	4.2	Slight	25.2	7.8	4.02	52
261	EC 313915	EC 313915	Good	28	4.6	Slight	30.2	7.4	2.62	60
262	KB 221	KB 221	Good	43.2	4.8	Severe	44.2	5.9	4.94	65
263	TGX 814-533	TGX 814-533	Poor	33.4	5	Slight	21.8	12.2	4.1	57
264	PK 258	PK 258	Very Good	61.2	4	Severe	42	6.5	1.62	63
265	EC 457198	EC 457198	Good	32	5.4	Slight	47.8	14.6	10.84	51
266	ND 83	EC 37939	Good	48	4.4	Slight	52.8	8.9	6.58	58
267	RSC 14	RSC 14	Good	54.2	2.8	Slight	32.2	8.8	5.02	57
268	PS 1029	PS 1029	Poor	27.6	3.8	Slight	23.6	8.7	2.46	58
269	NRC 80-1	NRC 80-1	Poor	29.4	3.4	Slight	56.2	10.2	7.86	59
270	GP 484	GP 484	Good	50.8	4	Moderate	49.4	7.2	2.64	66
271	RKS 52	RKS 52	Poor	27	5.6	Slight	52.2	6	2.32	59
272	AMS 59	AMS 59	Good	39.6	4.6	Slight	86.6	9.9	9.1	58
273	GP 501	GP 501	Very Good	65	4.8	Moderate	34.2	6.8	1.98	58
274	CAT 348	EC 18593	Very Good	67.2	4.6	Severe	35.2	5.9	1.64	65
275	CAT 44	AGS 150	Good	59.4	5	Slight	40.6	6.3	3.36	54
276	JSM 284	JSM 284	Poor	42	4.33333	Slight	53.6667	11.4	3.92	58
277	GP 453	GP 453	Very Good	54.2	3.4	Severe	11.4	5.8	3.06	62
278	GP 561	GP 561	Good	79.8	2.4	Severe	14	6.4	0.98	65
279	CAT 1799	TGX 824-32D	Very Good	61.8	4.6	Slight	41.4	5.2	1.74	65
280	GP 555	GP 555	Good	47	4.6	Slight	38	7	3.86	61
281	JSM 301	JSM 301	Poor	34.75	6.25	Slight	59.25	10.6	6.26	58
282	JSM 242	JSM 242	Poor	37	9	Slight	83.2	10.2	14.22	55
283	GP 540	GP 540	Poor	69	4.2	Moderate	51.8	9.5	4.76	57
284	LEE 53	LEE 53	Good	62.6	5.4	Moderate	71.2	6.6	5.76	64
285	LEE 96	LEE 96	Very Good			Slight		8.6	5.26	58
286	AGS 191	AGS 191	Poor	39.4	4.8		29.6	7.3	0.62	51
287	MACS 171	MACS 171	Poor	59.2	5.8	Slight	44.6	7.1	3	62
288	CAT 2560	EC 468597	Poor	39	5	Slight	90.2	6.5	2.52	61
289	RVS 2006-4	RVS 2006-4	Poor	31	5.8	Slight	37.2	12.2	8.74	58
290	AGS 747	AGS 747	Very Good	50.2	4.6	Severe	52.6	7.2	4	62
291	PS 93108	PS 93108	Good	34.8	4.2	Moderate	33.8	6.4	4.12	63
292	JSM 222	JSM 222	Good	45.8	4		80.6	8.2	9.96	56
293	GP 532	GP 532	Good	78	3.6	Slight	34.4	5.3	1.3	65
294	AMS 56	AMS 56	Poor	58.8	2.2	Slight	45.6	9.2	7.74	58
295	CAT 2682	EC 481468	Good	61.2	2.8	Moderate	38.2	6.7	1.98	64
296	NRC 37	NRC 37	Good	27.2	2.8	Slight	34.8	9.6	6.08	63
297	CAT 181	BB 24-94	Poor	35	6.2	Slight	70.2	8.5	12.56	57
298	CAT 886	EC 39177	Good	50.6	3.4	Slight	44.4	8.2	4.26	62
299	SL 525	SL 525	Good	49.2	5.8	Slight	44.2	8.4	9.68	59
300	GP 552	GP 552	Very Good	76.6	4.6	Slight	41.8	6.2	3.34	66
301	AGS 746	AGS 746	Poor	36.8	5.4	Slight	65.8	9.7	10.7	53
302	JSM 175	JSM 175	Poor	21.75	3.75	Slight	57	8.7	3.26	62
303	CAT 1102	IC 41686	Poor	64	5	Moderate	42	6.2	1.9	69
304	CAT 2755	EC 547464	Very Good	52.4	3	Slight	23.2	14.1	4.7	48
305	HIMSO 1597	HIMSO 1597	Very Good	63.8	4.4	Moderate	27	7.1	2.26	66
306	SL(E) 1	SL(E) 1	Very Good	41	5.4	Slight	41.6	8.5	2.46	43
307	GP 558	GP 558	Very Good	54.4	3.4	Moderate	27.8	6.6	1.22	62
308	RVS 2002-7	RVS 2002-7	Poor	28.6	7.2	Slight	34.2	10.8	7.72	60
309	RKS 45	RKS 45	Poor	70.8	3.8	Very severe	52.4	6.2	1.82	69
310	GP 537	GP 537	Very Good	81.8	5.2	Severe	45	6	1.94	67
311	CAT 710	EC 30967	Good	31.6	4.4	Slight	30.2	9.3	3.24	55
312	SL 29-51	SL 29-51	Poor	45.8	3.4	Slight	43.6	10.6	6.3	62
313	CAT 2598	EC 481215 A	Good	80.2	3.6	Moderate	38.4	6.4	2.02	66
314	CAT 2504	EC 457266(B)	Good	39	3.8	Slight	44.2	8.9	9.98	55
315	CAT 2814	EC 528628	Poor	42	4.4		47.8	11.2	16.04	49
316	CAT 868	EC 36816	Poor	44.2	4.8	Slight	39.4	6.6	2.1	66
317	CAT 868 B	EC 36816	Good	42	4.4	Slight	36.8	7.8	3.78	52
318	CAT 2685	EC 481474	Poor	32	4	Slight	35	10.2	4.28	57
319	CAT 938	EC 95815	Good	46	3.8	Slight	21.6	9.4	3.26	49
320	JSM 288	JSM 288	Very Good	65.4	4.2	Moderate	22.6	9.2	5.88	54
321	CAT 2950	EC 550830	Good	60	4	Slight	47.4	7.2	4.46	59
322	CAT 13	AGS 109	Poor	65	4.2	Severe	27.1	4.7	2.9	62
323	DS 91-3	DS 91-3	Good	45.2	5	Moderate	46.4	6.6	2.6	69
324	JS(SH) 85-94	JS(SH) 85-94	Poor	45.5	5	Moderate	96.5		0	65
325	MAUS 81	MAUS 81	Very Good	63.8	4	Severe	46	6.4	1.42	65
326	UGM 73	UGM 73	Good	71.6	3.8	Severe	43.8	6	0.64	63
327	JS 72-280	JS 72-280	Good	54.8	3	Slight	41.6	6.6	3.38	64
328	CO(SOY) 3	CO(SOY) 3	Very Good	66	2.4	Severe	22.2	6.7	1.28	67
329	GP P15	GP P15	Poor	24.8	5.8	Slight	40.6	6.9	3.34	55
330	MAUS 39	MAUS 39	Very Good	67.4	4.4	Moderate	48.6	6.2	2.46	65
331	CAT 3296	EC 589394	Poor	60.8	4.4	Slight	64.4	6.2	4.58	69
332	CAT 1497	S 58	Very Good	60.4	4.2	Slight	31.2	6.4	1.52	61
333	PS 1042	PS 1042	Poor	22.8	5.8	Slight	48.2	8.1	3.88	55
334	JSM 285	JSM 285	Poor	35	5	Slight	78	11.4	4.52	58
335	GP 527	GP 527	Very Good	57.4	3.8	Slight	48.2	6.4	4.88	60
336	JSM 236	JSM 236	Good	46.6	6.4	Moderate	76.8	11.7	16.18	53
337	CAT 305	EC 113773	Poor	48.2	4	Slight	90.8	9.7	10.64	55
338	CAT 2697	EC 481498	Very Good	63	3	Severe	18.8	5.5	2.06	66
339	GP 519	GP 519	Very Good	78.2	4	Severe	32	5.5	2.82	71
340	CAT 1494	RPSP 787	Poor	50.8	6.8	Severe	73	5.4	2.58	63
341	CAT 54	AGS 163	Very Good	48.4	4		39.6	6.5	3.9	49
342	GP 544	GP 544	Good	70.4	4.4	Severe	49.6	5.7	2.02	71
343	SL 790	SL 790	Poor	22.2	2.8	Slight	20.4	7.4	2.16	56
344	GP 466	GP 466	Poor	37.4	4.6	Slight	44.4	8.7	4.74	57
345	CAT 103	AGS 56	Poor	34.4	5.4		85	9.5	17.64	56
346	SL 46	SL 46	Poor	39.4	3.6	Moderate	43.4	5.8	1.42	69
347	GP 560	GP 560	Very Good	89	3.6	Severe	47.4	5.4	3.38	66
348	RVS 2006-1	RVS 2006-1	Poor	29.6	5	Slight	36.8	10.8	4.38	50
349	CAT 366	EC 241302	Very Good	59.8	4	Slight	40.2	8.3	3.26	59
350	CAT 2616	EC 481322	Very Good	72.2	6.6	Severe	53.6	6.2	2.62	65
351	CAT 844	EC 333940	Good	41.2	3.8	Slight	63.4	8	3.68	59
352	CAT 649	EC 289099	Poor	60.6	3.6	Moderate	58.4	8.7	4.48	59
353	CAT 1032	IC 15542	Very Good	78.5	4.75	Severe	82	6	3.14	62
354	CAT 2943	EC 546884	Very Good	33	5	Slight	70		0	55
355	JSM 207	JSM 207	Poor	30.4	3.6	Slight	37	11.5	4.26	53
356	GP 434	GP 434	Very Good	58.2	4.4	Very severe	78.6	6.2	7.88	59
357	CAT 87 A	AGS 38	Very Good	59.4	1.2	Moderate	18.8	8.3	3.52	57
358	CAT 87	AGS 38	Good	45	1.2	Slight	29.6	15.7	5.08	49
359	JSM 302	JSM 302	Poor	25.2	6.2	Slight	58	9.1	10.48	59
360	RKS 21	RKS 21	Poor			Slight		9.2	8.92	59
361	GP 505	GP 505	Poor	29	5.8	Slight	62.8	9	3.92	53
362	SL 759	SL 759	Poor	21	3.4	Slight	75.6	9.9	5.62	57
363	CAT 2758	KT RAMESHWAR	Poor	33.4	2.8	Slight	42.2	10	4.84	53
364	CAT 2388	EC 457214	Poor	30.8	4.2	Slight	84.8	9	13.5	54
365	CAT 2808	EC 528622	Poor	51	7.2	Moderate	89.8	12.7	20.74	59
366	CAT 360	EC 232075	Poor	61.8	5.2	Slight	25.8	6.1	1.36	64
367	CAT 1930	TUNIA	Good	67.6	3.4		57	6.2	6.48	59
368	CAT 2694	EC 481492	Good	72.6	3.2	Moderate	27.6	6.8	2.54	67
369	CAT 142	AKSS 62	Poor	31.6	7.2		79	9.3	13.04	59
370	AGS 33	AGS 33	Good	38.8	4.8		79.2	7.7	8.66	59
371	JS 20-25	JS 20-25	Poor	22	2.8	Slight	19.2	11.2	2.08	50
372	MAUS 85	MAUS 85	Poor	45.6	5.6	Slight	80.2	7.9	5.14	58
373	NRC 45	NRC 45	Very Good	65.8	4.6	Moderate	58.8	6.5	6.58	67
374	PK 1227	PK 1227	Poor	23.4	4.2	Slight	63.6	8.8	5.66	61
375	NRC 2007	NRC 2007	Poor	30	9	Slight	145		0	61
376	CAT 1529	SL 96	Good	27	4.2	Slight	49.4	9.3	9.16	53
377	CAT 2634	EC 481345	Good	68	3.2	Slight	43.4	6	3.24	67
378	SL 738	SL 738	Poor	27.8	4.6	Slight	27.8	8.9	5.14	46
379	GP 493	GP 493	Very Good	60.2	2.6	Severe	24	7.2	1.06	65
380	CAT 882	EC 39047A	Good	72.6	3.8	Slight	46.6	6.2	3.38	67
381	JSM 238	JSM 238	Poor			Slight		7.3	4.86	58
382	JSM 195	JSM 195	Poor	24.6	4.8		58	10.8	4.76	57
383	JSM 227	JSM 227	Poor	33.6	5.6	Slight	64	10.3	13.44	61
384	PS 1092	PS 1092	Poor	28.4	2.8	Slight	23	9.1	3.52	48
385	VLS 75	VLS 75	Good	49.4	3.4	Slight	46.6	9.4	9.42	66
386	JSM 250	JSM 250	Poor	25	4	Slight	27.25	9.1	0.78	61
387	GP 436	GP 436	Poor	50.2	3.6	Severe	26.6	8.6	2.28	56
388	GP 538	GP 538	Very Good	82.4	3	Slight	45.2	5.5	0.66	70
389	PS 1469	PS 1469	Very Good	24.4	4.8	Slight	31.8	7.3	1.48	53
390	GP 565	GP 565	Poor	50.5	6.5	Moderate	77.5		0	69
391	GP 562	GP 562	Poor	61.6	5.2	Severe	51.6	5.8	2.74	74
392	HIMSO 1566	HIMSO 1566	Poor	43.4	3.6	Slight	73.4	6.6	5.72	65
393	CAT 2928	EC 542431	Poor	44.8	2.8	Slight	29.6	9.6	5.92	59
394	GP 559	GP 559	Good	59	3.8	Severe	14.6	5	4.68	69
395	MACS 303	MACS 303	Poor	28.2	2.4	Slight	26.2	8.1	4.28	60
396	CAT 703	EC 309537	Good	47.6	3.2	Slight	28.2	8.7	3.26	57
397	CAT 9112	CAT 9112	Good	63	3.6	Severe	43.6	6	4.56	60
398	CAT 2572	EC 473269	Poor	46.6	3.6	Very severe	31.6	5.4	0.98	71
399	CAT 3218	EC 581520	Good	61.4	3.8	Slight	32.8	7.9	2.54	59
400	CAT 2469	EC 457475 (A)	Very Good	51.8	5	Slight	61	5.4	6.88	50
401	LEE 1	LEE 1	Good	38.6	2.8	Slight	31.2	10.3	7.36	60
402	JS 98-11	JS 98-11	Good	71.4	2.8	Moderate	31.8	7.2	2.7	64
403	JS 20-53	JS 20-53	Very Good	53.2	6.6	Slight	48.2	12.1	11.48	51
404	CSB 0804	CSB 0804	Good	27.4	4.4	Slight	30.4	7.6	2.6	55
405	SL 443	SL 443	Good	66	3.2	Severe	37.6	6.1	1.2	66
406	RVS 2006-22	RVS 2006-22	Poor	19.4	5.8	Slight	62.6	10.8	8.16	59
407	AMS 25-5-2	AMS 25-5-2	Very Good	31.4	3	Slight	24	7.8	3.3	55
408	SL 328	SL 328	Poor	28.8	4.6	Slight	43.8	7.7	5.48	53
409	CAT 1326	P 464	Very Good	73.6	2.4	Moderate	27.8	5.9	3	66
410	JSM 224	JSM 224	Poor	34	6	Slight	47.4	8.4	6.9	55
411	GP 573	GP 573	Poor	39.25	5.5	Slight	27.25		0	71
412	PK 76B	PK 76B	Poor	28.8	3.8	Slight	64	6.6	0.94	59
413	GP 567	GP 567	Poor	27	4	Moderate	50		0	61
414	GP 551	GP 551	Very Good	87	5.6	Severe	42.6	5.7	0.96	66
415	RKS 54	RKS 54	Poor	59.8	5	Slight	79.4	8	16.02	65
416	CAT 1502	SC 15B	Good	46.2	4	Slight	79.8	8.2	9.82	61
417	CAT 79	AGS 230	Poor	39.2	3.8		60	9.7	2.04	54
418	CAT 947	EPS 71	Poor	31.8	4.6	Slight	56.8	6.4	4.64	52
419	CAT 2948	EC 550828	Very Good	53.2	4.2	Slight	63.6	8.4	6.08	58
420	CAT 2908	EC 538824	Poor	23.2	2	Slight	19.2	8.3	2.52	44
421	CAT 3299	EC 589398	Good	31.2	4	Slight	51.6	9.7	3.5	58
422	JSM 298	JSM 298	Poor	28.5	5	Slight	101	7.4	10.42	61
423	CAT 2886	EC 538802	Poor	48.8	4.4	Slight	47.6	7.5	1.96	60
424	CAT 2891	EC 538807	Good	32.8	4.8		39.6	13.2	9.38	53
425	SL 432	SL 432	Good	65.4	3	Moderate	31	6.5	4.22	65
426	CAT 80	AGS 25	Very Good	91.4	6.2	Severe	50.4	6.6	4.84	73
427	GP 566	GP 566	Good	82.2	5.6	Moderate	70.4	6	3.52	71
428	JS 76-1194	JS 76-1194	Good	45	4	Severe	63	5.9	6.66	59
429	CSB 0811	CSB 0811	Very Good	66	3	Severe	40	6.5	1.7	71
430	EC 172607	EC 172607	Poor	27.2	2.8	Slight	34.8	8.5	4	62
431	MACS 1281	MACS 1281	Poor	27.8	4	Slight	46	8.1	6.02	60
432	TNAU 20037	TNAU 20037	Very Good	82.6	3.2	Severe	71	7.7	5.76	64
433	TNAU 20053	TNAU 20053	Very Good	55	3.8	Moderate	79	7.1	6.2	63
434	JS 71-05	JS 71-05	Good	28	4.2	Slight	51.4	10.3	11.66	52
435	G 88	G 88	Poor	40.4	4.4	Moderate	45.4	7.1	3.28	67
436	CAT 933	EC 95295	Poor	66	4.6	Moderate	34	6	1.16	65
437	JS 9	JS 9	Poor	24.2	2.6	Slight	41.8	7.4	4.7	59
438	SQL 15	SQL 15	Very Good	31.6	3.2	Slight	21	9.2	3.54	45
439	SQL 119	SQL 119	Very Good	32.4	3.8		30.8	9.8	5.64	47
440	CAT 543	EC 251416	Good	36.2	5.8	Slight	80.8	9.3	11.94	63
441	SQL 143	SQL 143	Very Good	33.4	2.6	Slight	13.2	11.7	6.06	47
442	SQL 150	SQL 150	Very Good	40.8	2.6	Slight	34	10.1	2.62	50
443	CAT 67 A	AGS 2	Very Good	64.6	3.2	Slight	41.6	6.6	2.72	60
444	CAT 67 B	AGS 2	Very Good	43.4	2.8		37.4	11.4	5.28	50
445	CAT 3394	EC 606917	Good	21.8	2	Slight	13.6	5	3.06	51
446	CAT 3414	EC 644408	Good	31.8	1.4		15	12.5	4.52	43
447	CAT 3367	EC 615168	Very Good	70.6	4.2	Moderate	42.8	7.7	6.62	56
448	CAT 3415	EC 644409	Very Good	36.6	2.6	Slight	30.8	5.8	2.26	51
449	CAT 3412	EC 638228	Very Good	29	2.8	Slight	13.8	13	3.44	47
450	SQL 83	SQL 83	Good	28	3.4	Slight	25.2	11.2	6.28	45
451	TGX 855-39 E	TGX 855-39 E	Very Good	51.2	2.2	Slight	22.6	11.2	10.56	50
452	SQL 152	SQL 152	Very Good	41.6	2.6	Slight	22.6	12.6	5.7	45
453	AMS 243-7-3	AMS 243-7-3	Very Good	40.4	3	Moderate	59.8	10.3	7.52	55
454	SQL 16	SQL 16	Very Good	59.6	2.8	Slight	20.6	9.3	6.86	53
455	SQL 11	SQL 11	Very Good	37	2.6	Slight	27.4	10.7	3.74	45
456	SQL 13	SQL 13	Very Good	36.2	3.6		30.6	14.2	5.92	44
457	SQL 86	SQL 86	Very Good	35.8	2.6	Slight	25.2	12.3	5.66	45
458	SQL 10	SQL 10	Very Good	39.8	3.4	Slight	22.8	11.1	4.94	43
459	SQL 113	SQL 113	Very Good	33.6	3.4	Slight	18.2	12.6	4.2	45
460	CAT 6 A	AGS 102	Very Good	54.6	3.6	Slight	70.2	9.1	9.4	57
461	CAT 6	AGS 102	Good	28.6	3.6	Slight	23.3	12.6	6.9	49
462	SQL 106	SQL 106	Very Good	40.6	3	Slight	25	8.3	7.82	49
463	SQL 9	SQL 9	Very Good	38	2.6	Slight	17.8	10.7	3.92	51
464	SQL 18	SQL 18	Very Good	36.8	3	Slight	24.2	12.4	6.84	44
465	CAT 135 A	AGS 97	Very Good	39.2	3.2	Slight	34.2	12.5	7.94	50
466	CAT 135 B	AGS 97	Good	52.2	4.8	Slight	52.6	6.3	8.36	58
467	SQL 35	SQL 35	Very Good	40.8	2.8	Slight	22.6	12	5.28	47
468	SQL 14	SQL 14	Good	27.8	3.2	Slight	24.8	10.2	4.34	45
469	CAT 316	EC 13054	Very Good	51	4	Slight	54.2	8.8	5.02	58
470	AMS 107	AMS 107	Very Good	49.2	4.2		33.8	10.1	8.76	46
471	MAUS 985	MAUS 985	Very Good	52.2	3	Severe	37.6	7.4	3.56	53
472	CAT 3307	EC 589407	Very Good	38.8	2.8	Slight	19.2	6.8	5.1	43
473	CAT 3303	EC 589402	Good	42.6	3	Slight	36.6	9.9	4.22	58
474	SQL 112	SQL 112	Very Good	40.4	2.4	Slight	21.8	12.9	4.9	46
475	CAT 510	EC 251348	Good	25.6	4	Slight	37.2	9.5	5.6	52
476	CAT 596	EC 251862	Poor	26.4	6.8		44.8	7	5.92	68
477	JSM 126	JSM 126	Very Good	38.8	4.2	Slight	39.8	10.5	7.94	55
478	CAT 3426	EC 685251	Very Good	34.8	2.6	Slight	18.8	11.9	6.12	46
479	PP 21	PP 21	Very Good	36.8	2.6		33.8	10.1	10.08	44
480	PP 47	PP 47	Very Good	56.8	3.2		36.6	8.6	5.28	45
481	SQL 120	SQL 120	Very Good	41.2	3	Slight	28.6	11.9	6.16	46
482	SQL 81	SQL 81	Very Good	32.2	2.6	Slight	15.2	13.6	6.18	43
483	CAT 319	EC 14425	Very Good	54	4.2	Severe	53.8	9.2	7.26	58
484	TGX 849-309 F	TGX 849-309 F	Very Good	56.8	3.8	Slight	39.4	8.5	6.46	55
485	CAT 548	EC 251432	Very Good	57.2	2	Moderate	42.4	8.1	4.06	62
486	CAT 414	EC 241789	Good	46.4	3.8	Slight	36.8	10.7	6.54	49
487	SQL 36	SQL 36	Very Good	40	4.6	Slight	27.6	10.9	6.38	46
488	CAT 541	EC 25141	Good	44.2	4	Slight	26.8	10.4	4.4	51
489	CAT 542	EC 251413	Good	40	5.2	Slight	61.2	9.9	9.7	61
490	CAT 91 B	AGS 42	Very Good	40.4	4	Moderate	48.4	8.3	1.54	59
491	CAT 91 A	AGS 42	Good	33.4	4.2	Slight	46.6	9.2	9.22	48
492	JS 20-76	JS 20-76	Very Good	44	3.6	Slight	36	8.8	8.12	53
493	CAT 590	EC 251827	Very Good	75.8	3.6	Moderate	46.4	8.9	10.24	58
494	MACS 1037	MACS 1037	Very Good	64.2	2.8	Slight	24.8	10.7	6.46	52
495	CAT 1266	MACS 58	Very Good	83.6	3.4	Slight	64.4	8.9	10.58	58
496	CAT 31	AGS 128	Very Good	44.8	3.8	Slight	40.6	10.3	4.14	61
497	MACS 1028	MACS 1028	Very Good	64	2.8	Slight	34.6	10.3	8.68	53
498	CAT 157 A	B 1665	Good	50.8	2.4	Moderate	26.6	6.5	1.78	65
499	CAT 118	AGS 74	Good	48.4	2.8	Slight	37.2	11.8	5.92	56
500	CAT 118 A	AGS 74	Good	47	2.8	Slight	30.6	6.7	2.02	63
501	504 FOUR SEEDED	504 FOUR SEEDED	Very Good	72.4	5.2	Severe	80	5.9	6.8	72
502	CAT 530	EC 251392	Poor	48.4	6.8	Slight	78.8	10.1	16.82	64
503	CAT 576	EC 251514	Good	24.2	2.2	Slight	26.2	10.8	2.02	45
504	CAT 536	EC 251402	Very Good	47.2	1.8	Moderate	15.2	7.4	2.46	37
505	CAT 417	EC 241805	Very Good	66.2	6	Slight	90.6	8	11.14	59
506	CAT 585 B	EC 251531	Very Good	37.4	2.4	Moderate	53.8	8.8	5.42	57
507	CAT 585 A	EC 251531	Good	70.8	2	Severe	30.4	5.3	8.08	37
508	CAT 502	EC 251311	Good	61.6	4.4	Severe	32.4	8.4	3.14	55
509	SQL 6	SQL 6	Very Good	42.4	3.8	Slight	29.2	8.9	3.56	46
510	SQL 144	SQL 144	Good	26.6	3.6	Slight	23	9.8	2.58	45
511	AMS 148	AMS 148	Very Good	49.2	4	Slight	19	10.4	4.26	51
512	CAT 539	EC 251405	Good	30	3.4	Slight	32.4	9.8	6.02	46
513	CAT 158	B 1666	Very Good	52.4	4	Slight	44	5.9	2.64	60
514	CAT 554 B	EC 251446	Poor	21.8	2.6	Slight	30.6	12.3	3.16	43
515	SQL 40	SQL 40	Very Good	44.2	2	Slight	20.8	11.9	5.4	46
516	SQL 88	SQL 88	Very Good	49.8	5.4	Slight	50.8	9.7	5.02	53
517	TGX 860-11 D	TGX 860-11 D	Very Good	53	4.4	Moderate	42.2	7.2	3.7	55
518	SQL 3	SQL 3	Very Good	46	2.6	Moderate	31.2	10	5.1	51
519	CAT 556	EC 251456	Poor	42	6.2	Slight	90.4	10.1	11.36	65
520	PP 45	PP 45	Very Good	49.2	4.6	Slight	40.4	11.6	8.06	51
521	SQL 111	SQL 111	Very Good	57.8	2.6	Slight	21.6	12.1	5.12	46
522	MAUS 5285	MAUS 5285	Very Good	95.2	3.6	Moderate	36	7.1	3.2	57
523	CAT 16	AGS 111	Very Good	71.5	4.4	Moderate	38	8	3.2	55
524	CAT 595	EC 251861	Good	66.4	3.6	Moderate	46.2	7.1	7.38	59
525	CAT 513	EC 251356	Very Good	82.2	3	Very severe	26	5.4	1.2	59
526	JS 20-80	JS 20-80	Very Good	53.6	4.6	Moderate	63.8	15	8.46	53
527	AMS 108	AMS 108	Very Good	49.6	3.4	Moderate	24	11.7	6.88	52
528	TGX B 1435 E	TGX B 1435 E	Very Good	48.8	3.4	Moderate	28.6	11	6.2	47
529	SQL 7	SQL 7	Very Good	38.2	2.6	Slight	23.8	11.6	6.04	46
530	JS 95-52	JS 95-52	Very Good	53.8	4.4	Severe	86	9.4	12.66	60
531	CAT 15	AGS 110	Very Good	45.7	5.7	Slight	61.3	7.2	4.74	66
532	SQL 145	SQL 145	Very Good	39.8	4	Slight	32.8	11.2	6.36	49
533	CAT 568	EC 251498	Very Good	44.2	2.6	Slight	46.2	8.8	6.92	59
534	MACS 756	MACS 756	Very Good	54	4.8	Slight	32	7.4	3.68	59
535	AMS 60-2-3-4	AMS 60-2-3-4	Very Good	45	4.2	Slight	20.6	12.3	6.04	49
536	MACS 708	MACS 708	Very Good	58.4	5.2	Severe	34.2	8.6	4.56	53
537	CAT 1178	JS 79-420	Very Good	63.2	3.4	Slight	21.2	15.6	5.4	53
538	MACS 1038	MACS 1038	Very Good	50	4.2	Severe	30.4	10.1	5.94	51
539	MACS 975	MACS 975	Good	38	6.6	Slight	37.4	10.1	4.12	57
540	JS 20-86	JS 20-86	Very Good	49	5.2	Slight	52.8	11.5	11.32	53
541	MACS 869	MACS 869	Good	62.8	4.4	Severe	51.2	8.6	5.96	59
542	JS 20-81	JS 20-81	Very Good	45	2.6	Slight	22.6	13.8	5.14	46
543	JS(SH) 94-21	JS(SH) 94-21	Very Good	38.6	3.8	Slight	33	8.1	3.76	56
544	MACS 754	MACS 754	Good	56.4	4.2	Slight	51	8.7	5.56	59
545	SQL 91	SQL 91	Very Good	55.4	2.8	Slight	21.2	10.3	4.58	51
546	SQL 38	SQL 38	Very Good	46.8	5.8		44	10.5	9.38	46
547	SQL 33	SQL 33	Very Good	35.8	4.2		35.2	12.1	7.14	45
548	SQL 95	SQL 95	Very Good	47.4	3	Slight	23	12.9	5.2	46
549	MACS 564	MACS 564	Very Good	74.2	3.6	Severe	43	7.2	2.26	61
550	JS 20-56	JS 20-56	Very Good	57.8	4.6	Very severe	40.8	11.2	8.14	53
551	TGX 86-24-6 F	TGX 86-24-6 F	Very Good	52.6	3.4	Severe	27	11.3	6.3	52
552	JS 20-49	JS 20-49	Very Good	54	4.6	Slight	64	11.4	13.96	57
553	SQL 32	SQL 32	Very Good	51.4	3.6	Slight	32	11.9	6.86	46
554	MACS 1034	MACS 1034	Good	45.8	4.4	Slight	30.4	11.8	9	51
555	MACS 871	MACS 871	Very Good	37	5.6	Slight	42.8	13.2	12	51
556	SQL 98	SQL 98	Very Good	52.4	3.2	Severe	30.4	11.1	6.28	48
557	JS(SH) 2001-64	JS(SH) 2001-64	Very Good	53.2	4.8	Moderate	54.4	14.5	15.36	53
558	SQL 4	SQL 4	Good	37.6	3.4	Moderate	28	12	6.36	50
559	AMS 115	AMS 115	Very Good	51.4	4.4		31.2	11.9	8.04	48
560	MACS 757	MACS 757	Good	31.8	5	Slight	34.8	7.7	3.6	57
561	TGX 854-429	TGX 854-429	Very Good	66.2	4.4	Moderate	34.2	12.8	8.34	46
562	SQL 8	SQL 8	Very Good	32.8	4.2		21.6	14.3	6.24	45
563	SQL 5	SQL 5	Very Good	49.8	4.2	Slight	35.2	13.7	8.28	44
564	SQL 12	SQL 12	Very Good	48.2	2.6	Slight	23.6	10.8	5.04	51
565	CAT 353	EC 18673	Very Good	32.6	3.8	Slight	22.4	11.7	5.08	45
566	CAT 353 A	EC 18673	Very Good	45.6	3	Slight	31	12.1	5.38	46
567	CAT 353 B	EC 18673	Very Good	81.75	2.25	Moderate	47	6.8	6.26	63
568	SQL 17	SQL 17	Very Good	47	3.4	Slight	22.2	12.3	4.72	47
569	CAT 529	EC 251388	Very Good	53	4.6	Slight	43	6.1	4.58	63
570	SQL 97	SQL 97	Very Good	37.6	3.2	Slight	24.8	9.5	3.92	45
571	JS(SH) 2003-2	JS(SH) 2003-2	Very Good	43.2	4.6	Slight	48.4	13	10.84	53
572	SQL 2	SQL 2	Very Good	41.8	2.2	Slight	31.4	10.3	4.06	51
573	SQL 19	SQL 19	Very Good	51.6	2.2		16.6	11.5	3.36	53
574	CAT 515	EC 251363	Poor	32.6	3.4	Slight	32	9.6	3.96	51
575	PK 515	EC 251363	Good	48.6	3.6	Slight	37.2	7.9	2.62	71
576	AMS 39-2-1	AMS 39-2-1	Very Good	58.4	3.4	Slight	25	9.1	5.4	55
577	SQL 93	SQL 93	Very Good	31.4	3.4	Slight	24	13.1	5.5	46
578	SQL 31	SQL 31	Very Good	43.4	3.6	Slight	27	11.3	7.8	46
579	SQL 110	SQL 110	Very Good	30	4.4	Slight	35.6	14.1	8.04	45
580	SQL 92	SQL 92	Very Good	37.6	4.2	Slight	33.4	11.1	7.6	46
581	SQL 102	SQL 102	Very Good	59.6	2.8	Slight	36.2	10	5.4	50
582	JS 20-73	JS 20-73	Good	52.4	4.4	Slight	46	12.6	11.58	55
583	AMS.MB 51-18	AMS.MB 51-18	Very Good	48.6	2.8	Severe	41.8	11.6	8.52	57
584	TGX 852-3 D	TGX 852-3 D	Very Good	48	4.2	Slight	33.2	11.6	8	51
585	SQL 89	SQL 89	Very Good	57.2	4	Slight	43.6	10.9	7.28	55
586	JS 20-37	JS 20-37	Very Good	60	3.8	Slight	53.8	9.8	10.56	57
587	CAT 1857	TGX 854-42 D	Very Good	55.6	3.2	Moderate	29	12.3	5.8	49
588	CAT 36	AGS 133	Very Good	61.6	4.2	Slight	50.6	10.2	7.7	58
589	CAT 526	EC 251380	Very Good	65.4	2.8	Slight	27.2	9.9	2.26	56
590	CAT 233	DB 1588	Very Good	73	2.5	Moderate	22.5	9.7	3.56	62
591	JS 20-42	JS 20-42	Very Good	47.2	5.4	Slight	34.4	10.3	7.82	53
592	JS(SH) 99-41	JS(SH) 99-41	Good	36	3.8	Slight	22.6	10.8	4.66	51
593	JS 20-58	JS 20-58	Very Good	36.8	4.2	Severe	33.2	9.1	5.6	57
594	CAT 454	EC 242084	Poor	51.6	7.2	Slight	65.4	6.9	3.78	66
595	CAT 476	EC 245988 A	Good	30.2	2.6		26.2	10.7	5.22	44
596	CAT 411	EC 241778	Good	53	4.2	Slight	51.8	11	3.76	62
597	CAT 411 A	EC 241778	Good	75.6	4.2	Slight	40.6	10.6	7.44	63
598	CAT 411 B	EC 241778	Good	70	7.4	Moderate	52.2	10.4	5.46	62
599	IC 18300	IC 18300	Very Good	72.4	2.6	Severe	21.6	7.9	1.74	60
600	CAT 371	EC 241310	Very Good	41.4	2	Moderate	18.8	6.2	4.64	68
601	AMS 38-24	AMS 38-24	Good	25.8	1.8	Slight	19.2	12	3.94	43
602	CAT 606	EC 251886	Very Good	46.6	1.8	Moderate	19.6	6.1	2.58	62
603	CAT 647	EC 289091	Good	54.8	2.2		27.8	6.7	3.02	58
604	MAUS 142	MAUS 142	Very Good	34.8	4	Slight	28.4	12	5.96	61
605	CAT 301 B	EC 110682	Poor	31.8	5.4	Slight	48.2	9.1	5.32	53
606	CAT 488	EC 250591	Good	73.4	4.4	Slight	54.2	9.3	6.88	58
607	CAT 473	EC 245986	Good	43.2	3.8	Slight	25.8	6.9	2.16	61
608	CAT 473 B	EC 245986	Good	60.6	4.2	Slight	20.8	8.2	3.5	67
609	CAT 437	EC 24200	Good	71.4	4	Moderate	45.6	5.1	3.7	70
610	CAT 464	EC 242111	Very Good	72.6	3.4	Slight	52.4	9.3	6.54	58
611	CAT 1935 B	V 1	Good	56.2	4.8		69.4	7.4	6.3	59
612	CAT 460 B	EC 242104	Good	81	3.6	Moderate	30.4	7.2	4.32	58
613	CAT 460 A	EC 242104	Good	40.6	2	Slight	35.2	9.5	4.26	51
614	CAT 696	EC 309529	Very Good	51.4	3.6	Severe	24	6.4	3.66	64
615	CAT 615 B	EC 274684	Very Good	46.6	2.2		16.4	4.1	2.04	56
616	CAT 1937	V 43	Good			Slight		9.1	7.66	55
617	CAT 418	EC 241807	Good			Slight		9.6	7.54	53
618	IC 5328186	IC 5328186	Very Good	57.4	4.2	Severe	63.6	9	5.08	57
619	PS 1341	PS 1341	Good	37.4	7	Slight	29.2	7.8	4.06	60
620	CAT 407	EC 241768	Poor	48.4	5	Slight	82	7.1	5.18	59
621	CAT 483	EC 250583	Very Good	55	5	Slight	29.8	8.9	4.84	57
622	CAT 410	EC 241777	Very Good	63.6	3.2	Moderate	32	12	3.58	55
623	CAT 489 A	EC 250601	Very Good	86	4.2	Moderate	32.4	7.8	3.08	66
624	CAT 489 B	EC 250601	Poor	36.6	3	Slight	56	9.4	7.42	51
625	PS 1347	PS 1347	Very Good	48.4	2.6	Slight	26.6	9.1	4.96	58
626	ND 113	EC 39503	Very Good	56	3.4	Slight	25.4	11	5.86	54
627	CAT 687	EC 309511	Poor	28	2.8	Slight	22.4	12.1	4.44	46
628	CAT 374	EC 241412	Very Good	62.8	2.8	Slight	17.8	7.1	4.22	66
629	CAT 453	EC 242082	Good	40	6.8	Slight	58	9.2	7.62	57
630	CAT 1945	V 80	Good	74.8	4.4	Slight	63.4	7.3	4.18	64
631	CAT 408	EC 241771	Very Good	73.2	5	Slight	56	9.1	5.14	59
632	CAT 326	EC 1619	Very Good	74	3	Severe	40.4	7.3	4.14	61
633	CAT 349	EC 18594	Very Good	69.6	3.2	Moderate	27.6	7.3	3.68	51
634	EC 2417788	EC 2417788	Very Good	49.2	3.8	Slight	33.4	10.9	6.96	49
635	CAT 689	EC 309513	Very Good	71.2	4.4	Slight	38.6	7.8	3.68	66
636	CAT 601	EC 251870	Very Good	88.4	3.8	Slight	20	7.1	4.26	61
637	CAT 1995	EC 333860	Very Good	65.4	5	Severe	79.8	9.3	5.28	59
638	MAUS 176	MAUS 176	Very Good	59	3.2	Slight	24.8	11.2	5.26	51
639	CAT 377	EC 241650	Very Good	58.6	3	Moderate	25.2	10.1	4.1	46
640	CAT 400	EC 241756	Very Good	46.6	3.6	Slight	22.6	11.6	4.68	47
641	CAT 425	EC 241827	Good	52.4	5.4	Slight	77.8	9.6	7.38	59
642	NRC 71	NRC 71	Good	40	4.2	Slight	32.8	9.6	5.36	48
643	DSB 4	DSB 4	Good	28.2	3.4	Slight	45	10.1	3.88	49
644	NRC 67	NRC 67	Very Good	42.4	4	Slight	31.8	8.8	4.76	51
645	DSB 8	DSB 8	Good	37.8	5.8	Slight	44.6	6.9	4.88	56
646	DSB 9	DSB 9	Poor	49	4	Slight	55.4	9.4	5.18	55
647	AGS 367	AGS 367	Poor	41.4	4.6	Slight	53.2	7.1	3.1	51
648	AGS 374	AGS 374	Good	63.6	5.2	Slight	39.6	6.6	4.26	66
649	AGS 376	AGS 376	Good	49	4.8	Slight	49.4	7.4	3.26	60
650	NRC 78	NRC 78	Very Good	55.8	5.8	Slight	32.2	6.4	4.68	57
651	NRC 84	NRC 84	Good	40.8	3.8	Slight	36	10.6	4.96	49
652	DSB 1	DSB 1	Good	37.2	4.4	Slight	47.2	10.7	7.66	51
653	CAT 121	AGS 79	Poor	45	8	Slight	86	6.7	6.48	71
654	DSBM 5	DSBM 5	Very Good	66	3	Moderate	27.6	6.8	4.42	59
655	CAT 42	AGS 148	Very Good	71.2	1	Moderate	26.8	6.9	3.72	62
656	DSBM 8	DSBM 8	Very Good	43	3	Moderate	21.4	8.2	4.22	58
657	DSB 15	DSB 15	Good	31	4.2	Slight	41.2	11.7	4.7	51
658	PS 1418	PS 1418	Very Good	33	4.6	Slight	31.4	10.6	6.32	48
659	PS 1329	PS 1329	Good	28	10.5	Slight	105	6.9	3.48	56
660	PS 1330	PS 1330	Poor	23.8	7.6	Severe	73.6	7.6	8.22	55
661	WT 37	WT 37	Good	57.8	6.4	Slight	67.6	5.4	2.98	65
662	PS 1417	PS 1417	Good	35.4	5.4	Slight	35.6	9.4	3.96	50
663	DSB 6	DSB 6	Good	28.2	5.2	Slight	73.8	8.6	6.06	53
664	PS 1339	PS 1339	Good	25.2	4.2	Slight	47.2	9.4	2.98	62
665	PS 1337	PS 1337	Good	24.6	4.8	Slight	44.2	7.2	2.76	46
666	PS 1336	PS 1336	Poor	34.2	3	Slight	55.4	9.1	5.24	56
667	AGS 19	AGS 19	Poor	35.5	6.5	Slight	45	9.4	2.14	69
668	PS 1471	PS 1471	Good	32.6	6	Slight	57	8.6	5.78	55
669	PS 1241	PS 1241	Good	32.2	4.2	Slight	36.2	6.9	3.06	57
670	PS 1480	PS 1480	Good	26	3.8	Slight	29.4	6.5	2.84	59
671	PS 1331	PS 1331	Good	31.2	5.8	Slight	37.4	6.9	4.18	53
672	WT 113	WT 113	Very Good	41.6	3.6	Slight	28.4	6.1	4.22	59
673	CAT 1969	WT 187 B	Good	40.4	4.8	Slight	58.4	8.1	6.28	58
674	CAT 1979 A	WT 96	Good	43.6	7.2	Slight	65.6	6.8	4.38	59
675	CAT 1979 B	WT 96	Poor	30.8	3.2	Slight	37.6	8.4	3.94	54
676	WT 169	WT 169	Good	86	6.2	Moderate	60.4	6.2	2.52	69
677	NRC 72	NRC 72	Good	30	3.6	Slight	32.6	9.1	4.56	51
678	CAT 1915	TGX 984-18 A	Good	42.6	6.6	Slight	82.4	5.1	4.36	65
679	CAT 1920	TGX 995-26	Good	32	3	Slight	80	8.3	4.2	58
680	CAT 1975	WT 35	Good	31	2.6		26.2	12.1	5.38	37
681	PS 1426	PS 1426	Poor	20	5	Slight	64	8	1.82	69
682	PS 1355	PS 1355	Good	31.8	2.4	Slight	25.6	6.6	4.46	53
683	PS 1356	PS 1356	Good	28	4.4	Slight	31	6	3.92	59
684	CAT 1986	EC 22999	Poor	28.4	4.8	Slight	35.8	6.5	2.88	66
685	PS 1346	PS 1346	Poor	22.8	4	Slight	40.4	5.3	2.74	59
686	PS 1343	PS 1343	Good	32	5.2	Slight	37.8	7.2	5.12	55
687	PS 1423	PS 1423	Very Good	37.2	6.4	Slight	64.8	11.7	15.9	57
688	PS 1333	PS 1333	Good	26.8	4	Slight	45.6	11.6	7.92	59
689	PS 1351	PS 1351	Good	34.4	3.4	Slight	39	7.1	4.18	55
690	CAT 1971	WT 191	Good	30	3.6	Slight	47.4	7.9	6	51
691	PS 1468	PS 1468	Good	31.2	3.6	Slight	31.8	9.4	4.24	58
692	PS 1391	PS 1391	Good	33	4	Slight	34.2	10.4	3.48	53
693	PK 1182	PK 1182	Good	26	2.8	Slight	24.6	7	3.32	59
694	PS 1461	PS 1461	Good	28.2	5.4	Slight	38.4	9.4	2.5	51
695	PS 1328	PS 1328	Poor	15	3	Slight	34.5		0	58
696	PS 1348	PS 1348	Good	53.4	4.2	Slight	44.8	5.1	3.46	71
697	CAT 1988	EC 23003	Good	26	4	Moderate	43.8	6.4	3.72	58
698	CAT 1933	TYPE 112	Poor	24.8	3.4	Slight	38.8	9.1	4.92	58
699	CAT 1943	V 56	Poor	32	3.4	Slight	53.8	7.8	6.88	57
700	PS 1304	PS 1304	Poor	36.4	4.6	Slight	69.2	9.3	8.54	67
701	CAT 1980	E 102	Poor	31.8	4	Slight	48.2	6.8	5.38	64
702	CAT 1944	V 61	Poor	45	4.6	Slight	31	6.6	3.82	68
703	PS 1362	PS 1362	Very Good	47.6	3.6	Moderate	26.6	8	4.7	58
704	CAT 1996	EC 341115	Good	47.4	7.4	Slight	77.4	8.3	6.48	59
705	CAT 1968	WT 187	Good	39.2	4.8	Slight	45	6.9	3.04	58
706	CAT 1950	VAM SAW	Good	58.2	3.6	Slight	40.6	5.4	3.78	66
707	PS 1413	PS 1413	Good	25	5	Slight	35	6.7	3.64	54
708	PS 1422	PS 1422	Good	40	4.2	Slight	34.4	8.2	3.26	53
709	PS 1412	PS 1412	Good	31.4	4.4	Slight	28.8	9.5	4.46	55
710	PK 1168	PK 1168	Good	41	3.2	Slight	52	6.2	2.7	61
711	CAT 567	EC 251496	Poor	45.6	3.6		29	8.7	2.44	62
712	PS 1507	PS 1507	Good	39.4	5.2	Slight	45.6	8.6	6.78	62
713	CAT 334	EC 172587	Good	31.8	5	Slight	35.8	6.8	2.3	59
714	PK 1173	PK 1173	Good	57	3.4	Moderate	35.8	5.6	4.76	62
715	PK 1258	PK 1258	Good	35.8	3.6	Slight	34.4	10.6	4.7	49
716	PS 1266	PS 1266	Poor	32.4	3.4	Slight	45	8.9	4.46	57
717	PS 1475	PS 1475	Poor	21	3.8	Slight	31.2	10.5	5.92	59
718	PS 1509	PS 1509	Very Good	42.8	4.6	Slight	32	11	5.7	51
719	PS 1474	PS 1474	Poor	20.5	3	Slight	19.75	10.6	2.88	58
720	CAT 356	EC 230143	Very Good	57.8	4	Moderate	59.4	9	6.56	59
721	CAT 332	EC 172577	Very Good	52.4	5	Slight	39	9.3	5.76	66
722	PS 1477 A	PS 1477 A	Good	25	3.8	Slight	34.8	11.2	9.2	53
723	PKS 15	PKS 15	Good	36.2	4	Slight	35.4	10.1	7.8	55
724	CAT 343	EC 175329	Very Good	41.8	3.4	Severe	50.2	7.1	6.04	61
725	PS 1506	PS 1506	Poor	20.75	4.25	Slight	25	10	3.5	56
726	CAT 341	EC 175321	Good	36.8	1	Slight	17.8	19.4	5.08	43
727	PS 1460	PS 1460	Good			Slight		9.9	4.5	58
728	CAT 333	EC 172578	Good	62	2.6	Moderate	50.6	9.7	2.04	61
729	CAT 524	EC 251378	Very Good	58.8	2.8	Moderate	42.2	7.5	3.16	53
730	CAT 524 B	EC 251378	Good	46.4	3.4	Slight	45.8	7.2	6.56	58
731	CAT 303	EC 113770	Very Good	50.8	4.4	Slight	53.6	7.2	4.92	61
732	CAT 482 A	EC 250582	Good	57.4	5.2	Slight	49.6	8.5	4.04	58
733	CAT 482 B	EC 250582	Poor	31.2	2.2	Slight	24.2	11.4	1.66	59
734	PK 1225	PK 1225	Good	27	3.8	Slight	31.4	8.2	4.72	57
735	PS 1464	PS 1464	Good	34.2	3	Slight	32.6	9.1	4.38	52
736	PS 1503	PS 1503	Good	27.2	5.4	Slight	34	9.2	4.22	59
737	PK 1284	PK 1284	Very Good	38.4	3.4	Slight	28.4	12.4	7.36	58
738	PS 1459	PS 1459	Poor	30.4	4.6	Slight	44.4	6.9	4.58	61
739	CAT 313 A	EC 114573	Very Good	55.2	3.6	Moderate	31.4	8.3	3.4	61
740	PS 1476	PS 1476	Very Good	35.6	5.4	Slight	44.8	7.5	5.46	59
741	PS 1363	PS 1363	Very Good	38	3.2	Slight	22.8	9.2	6.54	56
742	PK 895	PK 895	Poor	73	5.2	Moderate	83.2	5.5	5.3	71
743	CAT 25	AGS 12	Very Good	65.5	2.7	Slight	36.6	12.6	10.6	49
744	CAT 25 A	AGS 12	Very Good	59.7	5	Slight	56	5.7	1.3	56
745	CAT 39	AGS 142	Very Good	37.8	2.4		21.8	12.2	4.36	48
746	CAT 57	AGS 166	Very Good	66.6667	3	Moderate	32.6667	11.2	1.88	54
747	CAT 57 A	AGS 166	Very Good			Slight		11.1	11.12	47
748	CAT 57 B	AGS 166	Very Good	39	3.75		24.25	9.1	2.22	49
749	CAT 70	AGS 205	Very Good	75.75	1.25	Slight	11.5	10.9	1.12	55
750	CAT 81	AGS 31	Very Good	89.75	2.25	Slight	29.5	8.4	2.4	63
751	AGS 371	AGS 371	Very Good	59.5	3.25	Slight	42.5	7.8	6.56	54
752	AGS 373	AGS 373	Very Good	65.25	2.5	Slight	14.5	5.9	2	72
753	AGS 53	AGS 53	Very Good	74	3.8	Slight	23.6	7.1	1.48	59
754	AGS 751	AGS 751	Very Good	43.6	3.4		28	13.6	5.56	46
755	CAT 129	AGS 91	Good	41.8	2	Slight	18.2	11.1	3.44	46
756	CAT 162	B 254	Very Good	54.3333	2.33333	Slight	19.3333	10.6	2.34	47
757	BRG 8	BRG 8	Very Good	62.5	2.75		29	10	5.18	50
758	CAT 1000	Ga 82-8308	Good	80	3	Moderate	33.5	6.6	3.72	70
759	CAT 1002	H 67-23	Good	78.8	2.8	Moderate	12.2	6.7	1.6	69
760	CAT 1003	HAL	Very Good	40.4	3.2		36.4	12.2	7.96	47
761	CAT 1005	HIMSO 1519	Good	37.2	3.8		47.2	10.8	8.8	46
762	CAT 1009	HIMSO 1525	Very Good	48	2.4	Slight	24.8	12.9	4.38	52
763	CAT 101	AGS 54	Very Good	68	0.5	Severe	14	13.3	2.62	49
764	CAT 1014	HL 2	Very Good	79.25	1.75	Severe	16.75	8.4	4.2	61
765	CAT 1015	HL 5	Very Good	59.2	3.4	Slight	39.2	12	7.64	50
766	CAT 1027	IC 13054	Very Good	77.6667	2.66667	Moderate	45.6667	10.4	5.3	53
767	CAT 1033	IC 15545	Very Good	58.6	1.2		15.6	15.1	3.58	45
768	CAT 1034	IC 15549	Very Good	61	3	Severe	34.75	7.3	3.2	63
769	CAT 1045	IC 15765	Very Good	60.2	2.2	Moderate	45.4	7.5	3.74	54
770	CAT 1058	IC 15980	Very Good	39	2.4	Slight	20.6	9	0	58
771	CAT 1060	IC 15986	Very Good	44	3.33333		39.6667	10.3	2.12	52
772	CAT 1060 A	IC 15986	Poor	58	5	Slight	29	6.6	1.48	63
773	CAT 1060 B	IC 15986	Good	57.8	2.2	Slight	35.2	8.5	4.18	57
774	CAT 1062	IC 15992	Very Good	67.6	3.2	Moderate	48.4	7.3	4.88	57
775	CAT 1063	IC 15993	Good	62.2	3	Slight	68.4	7.4	3.92	59
776	CAT 1065	IC 15999	Good	63.6	2.4	Slight	30	6.5	2.16	63
777	CAT 1068	IC 16817	Very Good	79.2	2.8	Moderate	25	7.2	1.84	57
778	CAT 1070	IC 16821	Very Good	62.6	2.2	Severe	14.6	13.9	2.82	49
779	CAT 1076	IC 16974	Very Good	53	1.66667	Moderate	12.6667	6.7	1.98	55
780	CAT 1077	IC 16975	Very Good	68.6	3.2	Moderate	46.6	11.1	6.28	53
781	CAT 1084 B	IC 217	Very Good	72.8	2.8	Moderate	18	9	2.56	55
782	CAT 1085	IC 219	Very Good	51.4	2.8		33.8	12.3	6.44	49
783	CAT 1087 A	IC 222	Good	61.2	3.6	Moderate	25	6.7	1.62	55
784	CAT 1091	IC 24065	Very Good	82.6667	8	Moderate	37	7.9	3.1	58
785	CAT 1092	IC 24532A	Very Good	72.5	2.5	Moderate	38.5	14.4	3.44	54
786	CAT 1094	IC 24989	Good	77.4	3.2	Slight	43.4	6.9	4.82	54
787	CAT 1095	IC 24991	Good	66.4	3.2	Slight	45.6	6.7	3.64	66
788	CAT 1096	IC 24994	Good	50.2	2.4	Slight	42	8.2	4.06	55
789	CAT 1097	IC 24996	Poor	56.4	3.2	Slight	40.2	7.8	4.76	64
790	CAT 1099	IC 275	Very Good	39.6	3.4		33.2	10.4	6.38	49
791	CAT 1103	IC 41687	Good	59.6667	3	Severe	15	7.5	0.36	61
792	CAT 1109	IC 47390	Very Good	63.2	2	Slight	20.6	7.3	2.56	55
793	CAT 1112	IC 4880	Good	68.8	2.2	Moderate	37.2	6	3.36	60
794	CAT 1117	IC 49866	Good	56.6	1.6	Slight	23.6	9	2.66	58
795	CAT 1120	IC 93599	Very Good	49.6	2.8	Slight	24.2	10.5	2.96	52
796	CAT 1122	IC 9461	Very Good	63	3	Slight	43.75	10.9	5.08	45
797	CAT 1125	ICAL 122	Very Good	56.6	1.6		19.2	11.6	3.74	50
798	CAT 1130	I GAL 127	Good	57	1.4	Moderate	25.8	7	3.04	56
799	CAT 1132	I GAL 135	Good	57.6	3.2	Moderate	56.4	6.6	3.96	61
800	CAT 1135	ICG 9859	Good	62.6	2	Slight	47.4	9.2	4.16	58
801	CAT 1136	IMP 1	Very Good	42	2	Slight	25.4	9.6	3.02	60
802	CAT 1138	IMP PELICAN	Good	67.25	2.25	Moderate	18.5	6.2	2.04	57
803	CAT 1141	IPB 142-86	Good	68.4	2.4	Moderate	27	8.6	3.02	64
804	CAT 1145	J 117	Good	55.4	2.8	Severe	29.4	8.1	1.84	60
805	CAT 1148	J 202	Very Good	70.8	3.4	Slight	41	8.8	3.48	55
806	CAT 1150	J 76-205	Very Good	69.25	2.75	Moderate	44.25	10.5	3.8	52
807	CAT 1151	JAVA	Very Good	99	1.75	Moderate	13.25	6.1	2.18	64
808	CAT 1152	JH 2750	Very Good	62	3.6	Moderate	59.8	8	1.38	57
809	CAT 1157	JS 143	Very Good	36.4	3.4	Severe	37.4	10.4	6.08	51
810	CAT 1158	JS 29-273	Good	44	1.75	Slight	17.75	8.4	3.9	58
811	CAT 1164	JS 72-806	Good	60.25	1.25	Slight	22.25	8.3	2.42	57
812	CAT 1166	JS 73-16	Very Good	53.6667	2.66667	Slight	25.6667	11.8	2.98	49
813	CAT 1167 A	JS 75-19	Very Good	61.75	2.25	Slight	22.75	9.2	1.3	56
814	CAT 1167 B	JS 75-19	Very Good	55	2.5	Slight	31.75	8.6	1.92	55
815	CAT 1168	JS 75-19(5)	Very Good	65.75	3.75	Slight	30.25	9.7	3.38	55
816	CAT 1169	JS 75-30	Very Good	87.4	2.2	Moderate	40.2	9.5	5.52	55
817	CAT 1171 A	JS 79-214	Very Good	68.6	1.2	Slight	9.6	7.2	2.7	62
818	CAT 1171 B	JS 79-214	Good	70.2	2	Slight	40.6	7.1	3.78	64
819	CAT 1173	JS 79-22	Good	55	2.2	Slight	34	7.5	2.34	55
820	CAT 1175	JS 79-307	Good	67	1.5	Moderate	7.5	7.7	1.84	56
821	CAT 1176	JS 79-402	Good	64.25	2.25	Moderate	24.25	6	0.76	58
822	CAT 1179	JS 79-81	Good	39.2	2.2		24.6	10.2	3.16	53
823	CAT 1180	JS 79-81(S)	Good	41.2	4	Slight	59.2	9.7	8.22	54
824	CAT 1181 A	JS 79-82	Very Good	67.6	1.6	Slight	17	10.5	2.58	52
825	CAT 1182	JS 79-86	Good	80.75	3	Slight	33	10	2.92	52
826	CAT 1185	JS 80-39	Poor	41	1.66667	Slight	17	7.5	0.72	60
827	CAT 1186	JS 81 -1625	Very Good	74.2	2.8	Moderate	32.4	8.8	3.84	57
828	CAT 1187	JS 81 -180	Very Good	59.6	1.2		17.2	10	2.62	52
829	CAT 1189 A	JS 81-303	Good	30.8	1.4	Slight	18.2	9.2	2.66	53
830	CAT 1189 B	JS 81-303	Good	34.5	2	Slight	28.75	8.1	3.04	52
831	CAT 1190	JS 81-306	Good	41.4	1		22.6	8	3.3	52
832	CAT 1193	JS 81-5	Very Good	67.75	2	Severe	27.5	7	2.66	65
833	CAT 1195	JS 82-378	Very Good	92.5	1.75	Severe	11	6.9	2.2	63
834	CAT 120	AGS 76	Very Good	71.8	2	Moderate	28.6	11	4.68	55
835	CAT 1200	KALITUR(S)	Very Good	78	2	Moderate	33.75	7.9	1.06	53
836	CAT 1202	KB 14	Very Good	72.3333	3	Severe	14.6667	7.3	0.56	65
837	CAT 1204	KB 17	Very Good	69.2	3.2	Severe	34.2	8.8	4.32	60
838	CAT 1210	KHSB 2	Very Good	77.25	0.75	Severe	17.5	7.3	2.52	62
839	CAT 1211	KHSB 2(S)	Very Good	67.75	1	Moderate	34.5	6.6	1.86	63
840	CAT 1215	KN 523	Very Good	81.4	2	Moderate	27.2	6.7	2.5	63
841	CAT 1224	L 393	Very Good	45.25	2.25	Slight	26	8.8	2.36	53
842	CAT 1228 A	L 681	Good	94	2.6	Severe	42	6.1	2.42	62
843	CAT 1229	LESOY 273	Very Good	69	2.25	Moderate	30.75	10	2.98	56
844	CAT 1230	LOCAL 1	Very Good	35.4	1.6	Slight	22.4	8.6	4.78	48
845	CAT 1231	LOCAL 2	Very Good	95.6667	3	Moderate	40.3333	6.8	2.04	61
846	CAT 1232	M 1052	Very Good	73.4	1.6	Moderate	22.8	9.6	4.76	56
847	CAT 1236	M 1059	Very Good	34.6	2.6	Slight	17.2	14.1	2.74	46
848	CAT 1237	M 1085	Very Good	75.4	2.8	Moderate	38.8	9.8	6.84	64
849	CAT 1238	M 129B	Very Good	95.5	2.5	Slight	15.25	9.5	4	59
850	CAT 1240 A	M 19	Very Good	54.8	3.2	Moderate	39	5.9	1.06	57
851	CAT 1240 B	M 19	Very Good	69.8	2.2	Moderate	36.2	9.9	4.16	57
852	CAT 1241	M 204	Very Good	59	3.2	Slight	56.2	10.2	7.9	53
853	CAT 1241 A	M 204	Good	58.2	2.6	Slight	36.2	9.4	4.76	54
854	CAT 1243 B	M 467	Very Good	50.5	2	Severe	14	3.8	2.5	57
855	CAT 1248	M 78-8 106-2	Very Good	35.6	3.2		30.2	10.8	5.42	46
856	CAT 1251	MACS 13 (S)	Good	45.8	1.6	Slight	25	8.1	3.36	64
857	CAT 1254	MACS 22	Good	64.4	1.4	Moderate	33.4	7.8	2.44	62
858	CAT 1255	MACS 227	Good	55.75	2.25	Moderate	33	9.1	1.26	57
859	CAT 1258	MACS 250	Good	77	1.6	Slight	33.6	8.2	3.86	60
860	CAT 1258 B	MACS 250	Good	61.25	2.75	Moderate	34	7.2	1.8	61
861	CAT 1260	MACS 263	Good	60.5	1.25	Moderate	21.75	5.8	3.06	55
862	CAT 1260 B	MACS 263	Good	55.6667	2.66667	Severe	37.6667	9.3	3.38	54
863	CAT 1267 A	MACS 58 (S)	Very Good	71.4	3.8	Slight	34.2	8.9	2.34	60
864	CAT 1267 B	MACS 58 (S)	Good	75.75	1.25	Slight	24	9.9	2.72	54
865	CAT 1268	MACS 92	Good	43.8	2.2	Moderate	24.4	6	3.24	57
866	CAT 1276	NANKING 409	Good	54.8	1.8	Slight	32.6	7.3	3.06	60
867	CAT 1277	NANKING 419	Good	63.25	2.25	Moderate	44.25	6.8	1.96	61
868	CAT 1290	NKG 43	Good	65.6	2.4	Severe	32.6	10.5	4.56	55
869	CAT 1293 A	NLS 11	Good	62.6	3.6		42.6	6.7	2	68
870	CAT 1293 B	NLS 11	Good	43.2	4.8		35	8.9	5.02	49
871	CAT 1294	NLS 14	Good	37	1.6		23.4	10.4	3.66	49
872	CAT 1296 B	NP 1	Poor	52.2	1	Slight	28.6	8.2	4.58	54
873	CAT 1297	NP 2	Poor	32.2	3		22.4	7.6	2.74	52
874	CAT 1302	OBATSU RUMAME	Good	46.2	1.8	Slight	26	8.4	2.92	55
875	CAT 1305	P 10482	Good	32.6	1.6	Severe	8	3.9	2.02	57
876	CAT 1307	P 1120	Very Good	41.4	3.6	Moderate	23	7	3.08	53
877	CAT 1308	P 1122	Very Good	60	2.8	Moderate	44	9.7	4.6	53
878	CAT 1309	P 1123	Good	59.4	1.6	Moderate	34.6	7.7	4.04	71
879	CAT 1310	P 1124	Good	51	4.2	Moderate	59.2	6	3.7	57
880	CAT 1313	P 205	Very Good	39	4	Slight	32.75	10.7	4.42	47
881	CAT 1317	P 294	Good	70.75	2.25	Moderate	23.75	9.5	1.94	54
882	CAT 1318	P 302	Good	84.6667	4	Moderate	45	7	3.08	62
883	CAT 1321	P 318	Good	55.4	2		29.4	11.5	5.48	51
884	CAT 1323	P 356	Good	42.6	0.2		9.6	12.2	2.98	49
885	CAT 1324	P 42	Good	34.6	2.6	Slight	18.4	11.7	5.24	48
886	CAT 1325	P 426	Good	67.2	2	Moderate	44.4	8.2	2.16	64
887	CAT 1328	P 501	Good	78	1.2	Slight	22.8	11.1	3.7	56
888	CAT 1329	P 540	Good	44.4	1.8	Slight	15.6	10.3	3.56	51
889	CAT 1330	P 592	Good	34.25	0.75	Slight	23.5	13	2.76	53
890	CAT 1334	P 597	Good	42.4	3.2	Slight	51.8	10.6	6.24	53
891	CAT 1339	PI 103419	Very Good			Severe		6.3	3.2	65
892	CAT 134	AGS 96	Very Good	45.25	2.25		9.75	13.3	1.7	46
893	CAT 1341 A	PI 159923	Very Good	74	1.4	Moderate	31	9.3	2.96	56
894	CAT 1341 B	PI 159923	Very Good	93.75	2	Moderate	18.5	10.2	1.54	55
895	CAT 1347	PI 165947	Very Good	52.25	1.75	Moderate	32.75	10.8	2.56	54
896	CAT 1352	PI 171443 A	Very Good	56	3.2		27.6	9.4	4.22	52
897	CAT 1353	PI 171444	Very Good	38.8	2		18.2	11.7	3.66	50
898	CAT 1354	PI 175175	Very Good	80	2.8	Slight	39	7.8	5.8	59
899	CAT 1357	PI 200465	Very Good	60.2	4.4	Slight	57.6	9.9	8.44	59
900	CAT 1361	PI 203403	Good	37.8	3	Slight	26.2	9.1	3.96	48
901	CAT 1362	PI 203404	Good	62	2	Slight	37.6	5.6	4.16	64
902	CAT 1366	PI 204336	Very Good	56.6	4	Slight	39.4	8.7	3.34	52
903	CAT 1368	PI 208783	Good	78.2	2	Severe	15.8	4.8	1.18	59
904	CAT 1370	PI 209833	Very Good	55.2	3.6	Severe	63.6	9.8	5.1	54
905	CAT 1370 A	PI 209833	Good	42.6	2.6		22.8	9.1	2.6	54
906	CAT 1371	PI 209837	Good	64.25	2	Slight	21.5	7.8	2.04	53
907	CAT 1372	PI 209839	Very Good	102	1.6	Slight	12	8.7	4.16	59
908	CAT 1373	PI 210178	Good	35.6	3.4	Slight	24.6	10.5	4.28	51
909	CAT 1374 B	PI 215688	Good	53.4	1.6	Severe	23.2	5.7	1.2	65
910	CAT 138	AK 887	Very Good	53	2.4	Moderate	23.6	13.9	9.8	42
911	CAT 1382	PI 259539	Very Good	50.4	1.4		21.2	8.3	1.74	49
912	CAT 1387	PI 284815	Good	51.6667	0.666667	Severe	10.3333	8.9	1.38	55
913	CAT 139	AK 888	Good	67.6667	2	Moderate	9	7.2	2.48	54
914	CAT 1391	PI 307862	Good	58.5	1.5	Moderate	24	5.8	1.66	60
915	CAT 1396	PI 323568	Good	59.2	1.4	Slight	25.2	9.2	4.38	57
916	CAT 1398	PI 323579	Good	70	1.75	Moderate	23.25	7.6	2.02	56
917	CAT 140 A	AKSS 143	Poor	67	1	Slight	31.2	7.6	3.32	66
918	CAT 1400	PI 340900	Good	39.6	3	Slight	21.2	13.4	5.6	46
919	CAT 1402	PI 340903	Good	76.25	2.5	Moderate	43	7.8	1.86	57
920	CAT 1404	PI 341252	Good	81	1.4	Moderate	36.2	7.9	1.32	62
921	CAT 1406	PI 81037	Good	37.4	2.4	Slight	30.2	8.6	2.9	55
922	CAT 1409	PI 85537	Good	75.6667	2.33333	Moderate	26.3333	5.9	0.96	60
923	CAT 1410	PIMPRI	Good	64.6	3.4	Moderate	50.8	7.9	5.02	56
924	CAT 1411	PK 317	Good	66.4	4.2	Slight	66.8	7.8	7.3	57
925	CAT 1412	PK 412	Good	37.6	2.2	Slight	27.6	10.5	3.3	57
926	CAT 1420	PK 496	Good	43.8	2.4		21.4	11.9	3.26	54
927	CAT 1421 B	PK 560	Very Good	49	2.6	Slight	31.8	11.4	6.88	48
928	CAT 1423	PK 566	Very Good			Moderate		8.9	5	50
929	CAT 1424	PK 568	Very Good	72.6	2.4	Moderate	31.4	5.5	2.22	63
930	CAT 1425	PK 640	Very Good	73	3.8	Moderate	39.2	6.1	1.66	65
931	CAT 1426	PK 644	Good	43.8	2.8	Moderate	46.8	9.9	3.1	57
932	CAT 1427	PK 649	Good	36.6	1.8	Slight	18.6	10.9	2.98	45
933	CAT 1429	PK 718	Good	32	2.6	Slight	18	11.1	3.46	46
934	CAT 1430	PK 719	Good	32.4	2.2		30	8.1	2.04	57
935	CAT 1431	PK 722	Good	31.8	1.8	Slight	12	12.2	2.26	44
936	CAT 1432	PK 724	Poor	37.6	3.6		46.4	9	6.48	57
937	CAT 1433	PK 765	Good	39.6	2.4	Slight	21.2	11.6	4.18	51
938	CAT 1435	PK 777	Very Good	92	2.4	Moderate	23.8	8.7	5.18	59
939	CAT 1436	PK 779	Good	52	2.5	Moderate	11.25	11.6	0.68	59
940	CAT 1439	PLSO 12	Good	71.6	2.4	Moderate	30.4	6.3	1.56	64
941	CAT 1442	PLSO 39	Good	87.25	3.5	Slight	89.25	5.7	2.84	65
942	CAT 1447	PLSO 47	Good	54	2	Severe	14.6	4.2	1.44	56
943	CAT 1452	PLSO 56	Good	41.2	1.4	Slight	15.2	12.8	2.66	49
944	CAT 1453	PLSO 57	Good	57.4	2.2	Moderate	27.8	9.4	3.52	55
945	CAT 1456	PLSO 84	Good	60.2	2.4	Slight	22.6	9.8	4.4	56
946	CAT 1459	PLSO 9	Good	80.75	2.25	Moderate	29	7.5	1.58	66
947	CAT 1462	PLSO 91 A	Good	66.6	2.6	Moderate	36.4	10	3.34	64
948	CAT 1467	PLSO 97 A	Good	42.8	1.6	Slight	27	8.7	3.94	55
949	CAT 1471	PR 118-2-80	Poor	33.5	2	Slight	39.5	10.7	4.44	54
950	CAT 1476	PR 15-126-3-2	Good	30.2	1.2		21	8.5	1.6	59
951	CAT 1477	PR 15-126-3-8	Good	41.8	1.2		22.2	8.1	2.06	65
952	CAT 1478	PR 15-18--31	Good	53.8	2.2	Slight	39.2	6.9	1.54	58
953	CAT 1483	PR 35	Good	60	3.6	Slight	40.2	8.1	4.46	66
954	CAT 1485	Pb 1	Good	51.6	2.8	Slight	28.4	10.9	4.92	53
955	CAT 1489 A	RPSP 722	Good	38.6	2.2	Severe	22	6.6	4.98	41
956	CAT 1489 B	RPSP 722	Poor	59.4	2.6	Moderate	34.8	6.4	1.74	62
957	CAT 1491	RPSP 735	Poor	55.6	3	Moderate	36.2	6.7	1.98	61
958	CAT 1493	RPSP 786	Good	61.6	0.8	Slight	24.6	7.9	2.7	57
959	CAT 1499	SANDIO	Good	65.2	1.4	Slight	27	7.4	2.24	64
960	CAT 1500	SC 15	Good	74.4	1.6	Slight	30	8.6	2.1	64
961	CAT 1504	SC 16A	Poor	26.2	1.8	Slight	19	10.2	3.3	46
962	CAT 1506	SC 19	Good	33.6	2	Slight	14.4	10	2.08	52
963	CAT 1507 B	SC 21	Good	24.75	2	Slight	39.75	11.5	3.16	56
964	CAT 1508 A	SC 27	Good	37	1.8		27.4	9.3	3.22	52
965	CAT 1508 B	SC 27	Very Good	36.6	2.8	Slight	30	9.1	2.86	50
966	CAT 1511	SEM 6	Very Good	75.2	2.4	Moderate	48.2	8.7	4.06	54
967	CAT 1512	SEMINAL	Good	42.6	2	Slight	33	8.4	3.76	53
968	CAT 1516	SL 141	Good			Slight		6.5	2.46	52
969	CAT 1517	SL 142	Good	68	3.6	Slight	29.6	6.1	0	63
970	CAT 1518	SL 42	Good	49	3	Moderate	25.2	9.8	2.36	65
971	CAT 1521	SL 47	Good	42.25	2.75	Slight	29.5	6.3	2.16	59
972	CAT 1522	SL 68	Good	58.25	1.5	Slight	31	6.6	1.86	62
973	CAT 1523	SL 70	Good	47.8	5.6	Slight	50.6	4.6	2.18	58
974	CAT 1523 A	SL 70	Very Good	46	2.66667	Slight	36	8.7	2.68	52
975	CAT 1524	SL 82	Very Good	48.2	2.8	Slight	29.8	10	1.68	57
976	CAT 1525	SL 87	Good	48.4	1.8	Moderate	22.2	13.7	0	53
977	CAT 1526	SL 88	Very Good	44	2.8	Slight	22.2	11.3	3.26	52
978	CAT 1527	SL 89	Very Good	37.8	3.2		30.6	11.1	4.38	50
979	CAT 153	B 160-3	Very Good	43.5	2.75		21.5	13.9	3.36	46
980	CAT 1530	SL 96(S)	Good	45.8	1.8	Slight	34.6	12.6	4.52	54
981	CAT 1534	SOJA SAVANNA 6	Good	63.2	1.8	Slight	45.2	7.6	4.98	60
982	CAT 1539	SPC 174	Good	35.4	3.6	Slight	31.6	13	5.82	41
983	CAT 1542	SPF 5	Good	44.4	2.2	Slight	23.2	7.6	2.12	63
984	CAT 1543 A	SPI 4	Good	55	2	Moderate	36	8.4	3.6	61
985	CAT 1543 B	SPI 4	Good	75.4	3.2	Moderate	50.4	8.3	5.84	61
986	CAT 1544	T 8	Poor	68.4	3.6	Moderate	43.6	8.3	3.34	66
987	CAT 1547	TAMANISHKI	Good	60.4	1	Moderate	35.8	5.9	1.6	62
988	CAT 1548	TANGANYIKA	Very Good	34.6	2	Moderate	11.6	9.9	3.2	49
989	CAT 1552 A	TGX 022-E		29	2.6	Slight	41.2	9.4	3.9	51
990	CAT 1552 B	TGX 022-E	Very Good	31	2.8	Slight	37.4	11.8	8.48	47
991	CAT 1559	TGX 1016-5 F	Very Good	78.6	3.8	Moderate	41.2	8.9	5.9	77
992	CAT 156	B 1664	Very Good	65.4	2.6	Moderate	33.4	9	4.68	58
993	CAT 1560	TGX 1025-2 F	Poor	57	3		61	7.1	4.82	63
994	CAT 1562	TGX 1070-F6	Very Good	54	2.4	Slight	23.2	11.9	5.42	50
995	CAT 1569	TGX 1073-30 D	Very Good	71.8	5	Moderate	61	7.3	3.74	63
996	CAT 1571	TGX 1073-30 F	Good	79.8	5.4	Severe	61.8	6	2.84	62
997	CAT 1575	TGX 1073-54	Good	55.2	2.4	Slight	34	6.6	3.8	63
998	CAT 1576	TGX 1073-55 E	Good	64.8	3.4	Slight	34.8	5.7	2.96	62
999	CAT 1578	TGX 1073-56 E	Very Good	66.2	2.4	Slight	43.8	9.1	5.44	55
1000	CAT 1584	TGX 1361-F6	Good	53.4	2.6	Moderate	46.2	7.6	3.08	50
1001	CAT 1587	TGX 1488-9-1 D	Good	51	3.4	Slight	59.6	7.4	4.24	55
1002	CAT 1589 B	TGX 212-3 F	Good	37.2	2.4	Slight	14	9.6	3.88	46
1003	CAT 159	B 1667	Good	79.2	3.8	Moderate	61.8	7.4	6.1	65
1004	CAT 1597	TGX 239-43 D	Good	49.6	3.6	Slight	44.2	8.3	4.78	53
1005	CAT 1598	TGX 239-6 D	Poor	44	3	Slight	29.2	7.4	3.1	64
1006	CAT 1607	TGX 293-65 E	Very Good	60.4	2.6	Slight	26.4	12.8	4.3	49
1007	CAT 1609 A	TGX 293-71 E	Good	75.6	2	Moderate	31.6	6.4	3.66	63
1008	CAT 1609 B	TGX 293-71 E	Good	57.75	5.75		20.75	5.3	2.3	75
1009	CAT 1610	TGX 297	Good	60.8	2.4	Moderate	21	6.2	2.12	65
1010	CAT 1611	TGX 297-16 F	Good	71.2	1.2	Moderate	22.6	7.1	1.28	64
1011	CAT 1613	TGX 297-20 F	Good	64.8	1.6	Moderate	15.2	6.6	0.62	64
1012	CAT 1615	TGX 298-7 D	Good	51.4	3	Slight	37	7.7	4.54	55
1013	CAT 1622	TGX 302-2 A	Good	28.2	1	Slight	10	9.5	1.88	45
1014	CAT 1623	TGX 302-90-11	Poor	43	2	Slight	29.8	5.9	2.38	66
1015	CAT 163	B 325	Good	46.8	3.2	Slight	24	6.9	1.9	52
1016	CAT 1630 B	TGX 302A-68 D	Poor	83.5	2.5	Moderate	29.25	6.9	2.1	64
1017	CAT 1631	TGX 302A-68 E	Poor	43.2	2.6	Slight	29.6	5.9	2.12	66
1018	CAT 1633 A	TGX 311-101 F	Good	36.3333	2.33333		23	11.1	2.44	48
1019	CAT 1635	TGX 311-59 E	Good	38.6	2.2	Slight	26.6	10.1	3.92	54
1020	CAT 1637	TGX 312-012 E	Very Good	43.8	0.8	Slight	22.6	9.1	3.34	55
1021	CAT 1641	TGX 317-37 E		72.6	3.4	Moderate	54.8	9.2	4.16	53
1022	CAT 1641 A	TGX 317-37 E	Good	53.8	2	Moderate	18.6	6.7	1.62	55
1023	CAT 1641 B	TGX 317-37 E	Very Good	80.2	3	Slight	39.2	11.5	9.14	56
1024	CAT 1643	TGX 328-019 D	Very Good	69.75	2.25	Slight	36	9	2.9	58
1025	CAT 1644	TGX 328-04	Good	56.6	3.2	Moderate	42.4	8.3	5.16	56
1026	CAT 1645	TGX 328-049	Very Good	68.8	3.8	Moderate	52.2	8.8	6.8	57
1027	CAT 1646	TGX 328-049 A	Poor	70.8	4.4	Severe	54	8.1	4.44	65
1028	CAT 1648	TGX 330-325 D	Good	55.6	3.4	Severe	47.2	3.9	5.22	57
1029	CAT 1652	TGX 340-295	Poor	63.75	2.75	Slight	25	8.6	1.76	56
1030	CAT 1655	TGX 342-376	Poor	55.6	3.2	Slight	32.6	6.9	3.72	66
1031	CAT 1663	TGX 401-54	Good	45.4	4	Slight	27.6	9.8	4.5	56
1032	CAT 1664	TGX 416-06 C	Good	60.6	3	Slight	34.2	7.3	3.6	66
1033	CAT 1673 A	TGX 536-1009	Very Good	60.2	2.6	Slight	29.4	7.4	3.24	65
1034	CAT 1673 B	TGX 536-1009	Very Good	49.25	3	Slight	33.5	8.5	2.64	50
1035	CAT 1676	TGX 539-2D-7	Very Good	78	3.6	Moderate	29.6	6.3	2.72	64
1036	CAT 1686	TGX 573-209-02	Good	43.6	3.6		30.2	8.6	3.92	56
1037	CAT 1690	TGX 573-209-07	Very Good	54.2	4		37.8	7.9	2.56	55
1038	CAT 1691	TGX 573-209-22	Very Good	46	3.25	Slight	31.5	9.1	4.42	56
1039	CAT 1692	TGX 573-209-23	Good	72	2.6	Slight	45.2	8	6.12	54
1040	CAT 1694	TGX 573-209 D	Good	82	3.2	Slight	50.4	7.3	2.92	68
1041	CAT 1695 B	TGX 573-209 E	Very Good	49.2	3.6	Slight	60.8	7.7	3.76	59
1042	CAT 1696	TGX 573-219 D	Very Good	63.4	6.6	Moderate	53.8	6.8	4.82	65
1043	CAT 1699	TGX 573-97 D	Very Good	94	1.8	Moderate	26	8	0.82	61
1044	CAT 17	AGS 112	Very Good	47.2	3.2		35	9.1	4.2	48
1045	CAT 1701	TGX 576-21-9	Good	43.4	4		38.4	8.4	3.7	63
1046	CAT 1704 A	TGX 702-4-2	Good	45	4	Slight	25	12	4.08	49
1047	CAT 1704 B	TGX 702-4-2	Very Good	78.4	2.2	Slight	27.4	7.2	2.48	66
1048	CAT 1705	TGX 702-4-8	Good	67	3.4	Slight	51.4	9.6	10.48	56
1049	CAT 1706	TGX 709-50 E	Very Good	67.25	3.25	Slight	56.75	9.5	6.98	54
1050	CAT 1708	TGX 709-7 A	Very Good	52.2	3.8	Slight	33.6	12.1	8.26	50
1051	CAT 1710	TGX 709-7 E	Very Good	66.4	3.2	Slight	44	9.5	8.78	54
1052	CAT 1713	TGX 722-110 E	Good	71.8	4.4	Slight	66	6.4	1.48	74
1053	CAT 1716	TGX 722-169 E	Very Good	45.4	2.5	Slight	45.6	9.4	3.08	56
1054	CAT 172	B 47	Poor	57.2	2.2		43.8	8.4	3.76	55
1055	CAT 1720	TGX 780-5 A	Very Good	42	2		52.2	9.3	5	48
1056	CAT 1722	TGX 780-5 D	Very Good	76.6	3.8	Moderate	73.2	5.9	4.76	63
1057	CAT 1726 A	TGX 802-100 D	Very Good	61.2	4.2	Moderate	48.6	7.1	3.02	56
1058	CAT 1726 B	TGX 802-100 D	Good	44.6	2	Slight	39.2	9.6	5.02	56
1059	CAT 1732	TGX 802-150 D	Good	47.2	6.6	Slight	79.2	5.1	4.74	63
1060	CAT 1733	TGX 802-150 E	Very Good	53.6	3	Slight	59	7.9	10.92	54
1061	CAT 1735	TGX 802-265 D	Very Good	45	4.2	Slight	38.6	7.5	5.04	57
1062	CAT 1738	TGX 802-29 E	Good	46.2	4.4	Slight	33.2	6.7	2.94	66
1063	CAT 1744	TGX 811-10 D	Very Good	52	4.8	Moderate	88.8	6.6	8.14	51
1064	CAT 1749 A	TGX 813-14 D	Poor	58.6	3.2		32	5.2	1.12	59
1065	CAT 1749 B	TGX 813-14 D	Good	71.4	3.2	Moderate	40	6	1.44	71
1066	CAT 1749 C	TGX 813-14 D	Good	64	3	Slight	46.4	7.8	3.92	64
1067	CAT 1752	TGX 813-15 D	Good	78.8	3	Slight	34	6	2.78	63
1068	CAT 1755 B	TGX 813-22 E	Very Good	53.4	4.2	Slight	35.2	7.4	3.24	57
1069	CAT 1757	TGX 813-4 D	Good	71.2	2.4	Slight	54.4	5.9	3.28	61
1070	CAT 1759 A	TGX 814-13 E	Good	73.5	2	Moderate	35	7	2.9	65
1071	CAT 1759 B	TGX 814-13 E	Good	66	3.2	Slight	26.6	6.6	3.06	64
1072	CAT 1760	TGX 814-148 D	Good	68.5	4	Moderate	51	6.4	2.36	64
1073	CAT 1762	TGX 814-148 F	Good	67.25	4.75	Moderate	72.75	5.5	2.5	65
1074	CAT 1763	TGX 814-15 E	Very Good	55.2	3.25	Moderate	56	6.7	2.96	66
1075	CAT 1768 A	TGX 814-28 E	Poor	25	4.5	Slight	36.5		0	56
1076	CAT 1768 B	TGX 814-28 E	Very Good	65	3.8	Slight	47.4	6.6	4.06	67
1077	CAT 1769	TGX 814-33 E	Very Good	83.25	2.25	Slight	31.5	5.9	1.62	64
1078	CAT 1773	TGX 814-40 E	Very Good	51.2	3.2	Slight	31	8.7	0	52
1079	CAT 1783	TGX 814-54 E	Very Good	45.8	2.6	Slight	33.4	9.5	2.54	55
1080	CAT 1790	TGX 816-3 E	Good	44.4	3	Slight	41	8.7	6.32	59
1081	CAT 1793	TGX 822-10 D	Poor	45.2	2.4	Slight	48.6	8	4.64	58
1082	CAT 1794	TGX 822-10 E	Poor	45.6	2.4		37	9.5	4.8	62
1083	CAT 1795	TGX 824-10 F	Good	55.25	4	Slight	34	6.9	1.38	65
1084	CAT 18 A	AGS 113	Good	74.2	2.6	Moderate	50.7	6.7	2.2	63
1085	CAT 1808	TGX 825-17 B	Poor	35	3.4		48	7.8	3.62	56
1086	CAT 1810	TGX 825-17 E	Good	33.8	3.2	Slight	34.2	11	5.06	45
1087	CAT 1811	TGX 825-1 E	Good	66.2	3.2	Slight	40	9	3.72	55
1088	CAT 1812	TGX 825-3 D	Good	63.5	3	Slight	56	7.1	3.58	54
1089	CAT 1815	TGX 832-12 D	Poor	25	6	Slight	44		0	57
1090	CAT 1816	TGX 834-202 D	Good	58.8	2.2	Slight	30.2	5.3	3.52	63
1091	CAT 1820	TGX 849-143 D	Good	81.4	2.6	Moderate	46.4	5.7	2.46	65
1092	CAT 1826	TGX 849-247 D	Good	45.6	2.4	Slight	39.2	9.3	3.34	57
1093	CAT 1829	TGX 849-294 D	Good	62.2	2.4	Slight	34.6	8	2.62	66
1094	CAT 1831	TGX 849-309 A	Very Good	67.2	3.4		43.6	5.8	2.62	62
1095	CAT 1831 B	TGX 849-309 A	Good	55.75	2.5	Slight	38.25	7	1.6	62
1096	CAT 1836	TGX 849-315 D	Good	63	2.4	Slight	37.4	5.6	2.54	67
1097	CAT 1839	TGX 849-380	Poor	35.8	4.2		69.6	7.2	4.7	57
1098	CAT 184	BDS 190	Good	48.4	3	Slight	73.8	9.3	3.62	57
1099	CAT 1841	TGX 849-47 F	Good	56.8	4	Slight	37.2	8.2	3.56	58
1100	CAT 1843 A	TGX 849-813	Good	48	4.4	Slight	41	6.4	3.22	66
1101	CAT 1843 B	TGX 849-813	Good	61.75	3.25	Slight	86	10	9.98	62
1102	CAT 1847	TGX 849-D-13-4	Good	71.4	3.2	Slight	63	7.4	7.06	71
1103	CAT 1850	TGX 853-10 E	Poor	51	2	Slight	39	9	3.58	64
1104	CAT 1858	TGX 854-42D-1	Good	56.5	2.25		30.75	7.8	3.12	67
1105	CAT 1861	TGX 854-4 E	Good	49.25	3.25	Slight	48.5	11.4	4.64	48
1106	CAT 1878	TGX 855-32 E	Good	57	2.4	Slight	41.6	9	3.1	56
1107	CAT 188	BR 10	Good	76.8	2.2	Moderate	30.2	8.8	2.38	63
1108	CAT 1881	TGX 855-44 G	Good	58.8	2.8		51.4	9.2	5.56	51
1109	CAT 1882	TGX 855-53 D	Good	72.8	3	Slight	33.4	6.4	1.9	67
1110	CAT 1886	TGX 859-9 D	Good	24.2	2	Slight	28	14	6.56	40
1111	CAT 189	BR 11	Good	36.6	2.2	Slight	37.4	11	6.6	46
1112	CAT 1894	TGX 86-24-1 D	Good	52	3.6	Slight	71.8	8.9	6.72	56
1113	CAT 1898	TGX 86-24-5	Good	83.8	3.4	Moderate	26.6	5.8	1.9	61
1114	CAT 1899	TGX 86-24-6 E	Good	55.6	2.6	Slight	41.8	7.3	3.94	63
1115	CAT 1912	TGX 899-285 D	Good	63.6	1.4	Slight	40.6	8.2	4.02	55
1116	CAT 1916	TGX 984-18 E	Good	56.6	2.4	Slight	42.4	9.9	6.3	56
1117	CAT 1917	TGX 993-F6	Good	58.6	2.8	Moderate	48.2	10.1	8.48	56
1118	CAT 192	BR 15	Good	44	2.33333	Slight	34	12	4.24	47
1119	CAT 1921 A	TGX 996-4F6	Good	36.6	3	Slight	31	10.5	6.5	44
1120	CAT 1921 B	TGX 996-4F6	Good	73.2	3.2	Moderate	25.8	6.3	1.52	56
1121	CAT 1927 A	TK 5	Good	33.2	2.2	Slight	31.6	12.2	6.38	49
1122	CAT 1927 B	TK 5	Very Good	65.4	4.2	Moderate	45.8	6.8	2.3	56
1123	CAT 1927 C	TK 5	Good	49.6	4.6		56.4	5.9	2.86	67
1124	CAT 1928 B	TK 6	Poor	35	2.2	Slight	26.4	10.4	4.84	48
1125	CAT 1931	TUNN MAYO 2	Good	60	1.6	Slight	34.2	7.9	4.34	57
1126	CAT 1936	V 31	Good	81.6	3.4	Moderate	61.8	5.8	4.44	53
1127	CAT 194	BR 3	Good	63.4	2.8	Moderate	46.6	9.1	5.96	50
1128	CAT 1957	VLS 11	Very Good	61.6	2.6	Slight	50.8	7.6	6.28	55
1129	CAT 1960	VLS 14	Poor	49.6	3.2	Slight	45.4	9.5	7.78	57
1130	CAT 197	BR 6	Good	36.2	3.2	Slight	28.2	11	4.7	49
1131	CAT 198	BR 7	Very Good	72.8	3	Severe	45.8	11.1	11.52	49
1132	CAT 1987 B	EC 23001 B	Good	36.4	3.4	Slight	27.4	12.2	6.12	47
1133	CAT 1993 A	EC 264 A	Poor	45.6	2.4	Slight	56	11.2	10.1	55
1134	CAT 1993 B	EC 264 B	Poor	31.8	4.6	Slight	31	10.8	6.9	44
1135	CAT 1994	EC 30942	Good	33.6	3.4	Slight	32.2	11.7	6.24	49
1136	CAT 1997	EC 341822	Poor	62.8	3.8	Slight	56.2	6.9	3.68	60
1137	CAT 2004	EC 343310	Poor	36.8	4.8	Slight	40.6	9.2	7.2	53
1138	CAT 2005	EC 343311	Poor	39.2	4.2	Slight	46.4	10	3.02	56
1139	CAT 2006	EC 343312	Good	81.6	4.2	Slight	67	9.6	5.64	58
1140	CAT 2008	EC 350664	Very Good	49	3.2	Slight	65.2	13.3	11.48	51
1141	CAT 2024 A	EC 357998	Very Good	52.8	3.4	Slight	38.4	9.9	7.2	55
1142	CAT 2026	EC 358002	Very Good	71.2	4.8	Moderate	54.8	9.8	9.66	55
1143	CAT 203	BRG 1	Very Good	41.2	3.2	Slight	35.8	10.3	6.68	51
1144	CAT 2034 B	EC 377883 B	Good	55.8	2.4	Slight	32.6	10.5	4.5	53
1145	CAT 2036 A	EC 380522 A	Good	38	2.2	Slight	35.8	10.4	5.42	53
1146	CAT 2036 B	EC 380522 A	Poor	28.2	2.2	Slight	36.4	9.1	4.98	53
1147	CAT 2039	EC 60020-8-7/18	Good	39	2.4	Slight	31.2	10.3	5.46	54
1148	CAT 204	BRG 12	Very Good	42.4	6		45.8	12.8	7.34	45
1149	CAT 2041	G 2027	Good	67	2.6	Slight	54	11.3	4.1	57
1150	CAT 2047	GC 12	Very Good	64.25	2.5	Slight	30.3333	10.4	2.44	56
1151	CAT 2050	GC 17	Very Good	75.8	1.8	Slight	33.8	9.7	4.96	56
1152	CAT 2051	GC 22	Good	38.2	2.6		19	12.6	2.52	48
1153	CAT 2055	GC 80	Very Good	65.6	2.8	Slight	32.8	8.9	6.98	57
1154	CAT 2056	GC 98	Good	73.8	1.8	Slight	21.4	10.3	3.28	55
1155	CAT 2057	GC 84040-7-1	Very Good	70.2	3	Slight	37.4	9.6	1.32	56
1156	CAT 2058	GC 84051-32-1	Good	64.2	3.2	Slight	35.8	10.2	4.94	55
1157	CAT 2059	GC 84058-18-4	Poor	64.4	4.4		63	10.7	5.52	53
1158	CAT 2061	GC 87019-4-1B-4	Good	47.4	2.8	Slight	39.4	10	4.44	55
1159	CAT 2065	ICS 84/86-85B-41	Good	50	3.2	Slight	45.8	11.1	7.26	44
1160	CAT 2066	M 108	Good	33.4	2.8	Slight	28.2	11	4.84	47
1161	CAT 2067	M 486	Poor	36	3.2	Slight	45	10.4	4.74	53
1162	CAT 2068 A	N 928 A	Poor	56.4	2.4		23.8	6.6	1.18	66
1163	CAT 2068 B	N 928 A	Very Good	53.6	3.6		50.8	12.5	10	50
1164	CAT 2069	NRC 2	Very Good	41.8	4	Slight	30.2	7.7	4.1	47
1165	CAT 2070 A	Pb 1 (S)	Very Good	68.2	4	Slight	43.6	12	4.78	49
1166	CAT 2070 B	Pb 1 (S)	Very Good	67.6	2.4	Slight	43.6	10.2	2.96	55
1167	CAT 2071	PPI 72-2-5-6	Good	45.6	3	Slight	51.4	8.1	5.48	52
1168	CAT 2072	PT 60269	Good	62.4	6	Slight	81.4	7.6	1.16	62
1169	CAT 2082	VP 1143	Very Good	64.75	2.5	Slight	40.75	9.6	3.72	54
1170	CAT 2083 A	VP 1147 A	Good	50.8	1.8		26.2	10.7	3.5	54
1171	CAT 2084	VP 1149	Good	56.2	2.2		39.4	10	4.12	54
1172	CAT 2086 A	VP 1156	Good	59.4	3.2	Slight	33.8	8.4	3.32	59
1173	CAT 2086 B	VP 1156	Good	57.4	4		104.2	9.4	7.9	56
1174	CAT 2088	VP 1159	Poor	46.8	3	Slight	58	8	3.52	55
1175	CAT 2090	VP 1162	Good	37.8	3	Slight	30.6	11.6	0	50
1176	CAT 2091	VP 1164	Good	59.2	2.2	Slight	23.6	10.1	1.58	56
1177	CAT 2093	VP 1168	Poor	35.4	3.6	Slight	41.4	9.3	6.64	51
1178	CAT 2094	VP 1170	Good	49.4	2.4		35	10.2	5.04	54
1179	CAT 2095	VP 1173	Good	41.2	3.6		38.6	8.9	3.42	56
1180	CAT 2096 A	VP 1174 A	Good	36.6	2.6	Slight	46	6	3.72	58
1181	CAT 2096 B	VP 1174 A	Poor	42.6	5		62.2	8.5	7.04	53
1182	CAT 2097 A	VP 1177 A	Poor	65	3.6	Slight	52.4	11.7	15.96	55
1183	CAT 2097 B	VP 1177 B	Poor	47.2	2.8	Slight	47.2	9	3.4	56
1184	CAT 2098 B	VP 1180 B	Good	46.8	5.2	Slight	85.2	7.1	5.4	53
1185	CAT 2099	VP 1181	Poor	29.6	2.8	Slight	30	10.6	3.94	59
1186	CAT 21 A	AGS 116	Good	46.7	2.6		33.2	10.1	4.5	61
1187	CAT 21 B	AGS 116	Good	73.5	1.6	Moderate	27	8.9	3.4	63
1188	CAT 2101	VP 1183	Good	56.4	3.6	Slight	40.8	10.3	4.06	56
1189	CAT 2104	VP 1187	Good	48.6	2.4	Slight	23.6	11.1	4.46	55
1190	CAT 2105	VP 1192	Good	53.8	2.2	Slight	39.8	9.1	4.82	56
1191	CAT 2107	VP 1199	Good	68.8	3.4	Moderate	50.4	7.8	6.66	52
1192	CAT 211	C 1716	Very Good	64.2	2	Moderate	25.6	6.1	2.76	50
1193	CAT 2110	VP 1206	Good	85.8	3.8	Moderate	49	6.9	4.6	63
1194	CAT 2111	VP 1206-9	Good	93.8	4	Moderate	69.6	9.3	4.6	61
1195	CAT 2114 A	EC 389148	Good	49.6	2.8	Slight	66	6.5	6.88	51
1196	CAT 2115 B	EC 389149	Good	54.6	3	Slight	44.2	6.2	4.58	54
1197	CAT 2117 B	EC 389153	Good	79.6	5.2	Slight	73.4	6.9	8.88	72
1198	CAT 2118	EC 389154	Good	42.4	3.4	Slight	32.4	7.6	3.46	56
1199	CAT 2118 A	EC 389154	Very Good	68.2	4.6	Severe	56.2	6.8	3.54	62
1200	CAT 2118 B	EC 389154	Very Good	70.2	1.6	Moderate	28.6	9.2	2.08	56
1201	CAT 2118 C	EC 389154	Very Good	59.8	2.8	Moderate	49.8	9.2	5.88	56
1202	CAT 2119 B	EC 389155	Very Good	38.2	5.8	Moderate	46.2	6.7	6.86	60
1203	CAT 2120 A	EC 389158	Very Good	65.2	3.8	Moderate	49.2	9.9	3.72	54
1204	CAT 2122 A	EC 389160	Good	53.4	3.4	Slight	52.4	7	4.64	51
1205	CAT 2124 A	EC 389164	Good	80.8	4	Moderate	57	6.6	4.46	63
1206	CAT 2124 B	EC 389164	Good	51.3333	5.33333	Slight	47.6667	10	4.68	57
1207	CAT 2125 B	EC 389165	Good	44.4	3.6	Slight	45.8	15.2	7.02	54
1208	CAT 2126 A	EC 389170	Good	48.6	3.6	Slight	47.2	6	4.12	62
1209	CAT 2126 B	EC 389170	Good	50.2	3	Slight	25.8	6.1	2.72	57
1210	CAT 2127 B	EC 389174	Good	45.2	3	Slight	30	7.5	3.06	58
1211	CAT 2130 B	EC 389179 B	Good	52.8	2.6	Slight	45.2	8.7	3.08	52
1212	CAT 2131	EC 389391	Good	51	2.4	Slight	41.8	9	6.08	59
1213	CAT 2132 A	EC 389392	Poor	41.6	7	Slight	106.2	7.2	0	67
1214	CAT 2132	EC 389392	Good	33	2	Slight	27	10.2	3	51
1215	CAT 2134 A	EC 389396 A	Poor	31	3	Slight	40		0	52
1216	CAT 2136	EC 389399	Good	45.8	2.6	Slight	38.6	9.8	4.02	54
1217	CAT 2142	EC 390979	Good	40.8	2.6		22.2	13.1	0	50
1218	CAT 2144 A	EC 390981 A	Good	75.4	3.4	Moderate	87.8	7.7	9.54	60
1219	CAT 2144 B	EC 390981 B	Very Good	60	2.6	Slight	37.6	1.4	5.7	54
1220	CAT 2151	EC 391012	Good	51.2	2.8		31	12.8	4.52	50
1221	CAT 2153	EC 391152	Good	61.8	3	Slight	41	12	6.44	55
1222	CAT 2158	EC 391164	Good	45	3.6	Slight	50.2	9	8.04	57
1223	CAT 2160	EC-391172	Poor	92.2	4.8	Slight	72.8	7.9	10.62	75
1224	CAT 2161	EC 391181	Good	63.4	2	Moderate	29.2	9.7	0	58
1225	CAT 2162	EC 393222	Good	91.6	3.2	Moderate	69.6	9.2	8.92	76
1226	CAT 2163	EC 393223	Poor	42.8	3.6		45.8	9.6	5.4	59
1227	CAT 2166	EC-393237	Poor	34.8	3.4	Slight	54.2	9.8	3.78	58
1228	CAT 2175	EC 391316	Good	52.8	2.6	Slight	33.8	10.3	4.8	56
1229	CAT 2185	EC 391332	Good	55.4	2.4	Slight	29.8	9.8	1.9	55
1230	CAT 2195	EC 391346	Very Good	62	1.8	Moderate	23.8	9.7	1.52	54
1231	CAT 2197 A	EC 391349	Good	47.6	2.6	Slight	32.4	9.2	3.4	53
1232	CAT 2197 B	EC 391349	Good	60.2	3.4	Slight	44	8.6	3.2	54
1233	CAT 2203	EC 396055	Good	70.8	3.8	Moderate	42.8	9.5	3.78	61
1234	CAT 2205 B	EC 396057	Good	43.6	3.2	Slight	29.2	8.6	4.06	54
1235	CAT 2207 A	EC 396059	Good	51.2	3.2	Slight	39.2	10.3	3.9	54
1236	CAT 221	D 327	Very Good	51.2	1.8	Moderate	20.2	7.3	2	50
1237	CAT 2213	EC 396065	Poor	43.4	3	Slight	39.8	10.9	7.06	55
1238	CAT 2215	EC 396067	Poor	35.4	2.6		40	9.5	2.88	53
1239	CAT 2220	EC 389152	Poor	72.6	4.4	Slight	63	8.5	7.82	76
1240	CAT 2221	EC 389156	Good	75.6	3.8	Moderate	38.6	7.6	2.34	70
1241	CAT 2222	EC 389157	Good	34.8	3.4	Slight	33	10	4.7	50
1242	CAT 2223	EC 389161	Good			Slight		9.1	5.78	66
1243	CAT 2224	EC 389163	Good	57	2.6	Slight	37.8	11.1	6.08	64
1244	CAT 2225	EC 389166	Poor	47.75	7.75	Slight	82.5	6.9	7.12	64
1245	CAT 2225 B	EC 389166	Good	61.8	3.2	Moderate	34.4	8.1	4.08	64
1246	CAT 2226	EC 389167	Good	72.6	2.4	Moderate	43.4	8.7	6.26	66
1247	CAT 2231	EC 389173	Good	70.2	2.2	Slight	45.8	9.6	4.78	36
1248	CAT 2234	EC 393224	Good	48	5.2		58	6.9	3.98	58
1249	CAT 2234 A	EC 393224	Good	56	2.6	Slight	46.6	9.6	2.98	57
1250	CAT 2237 B	EC 393228	Good	75.4	2.8	Moderate	40.8	9.2	5.52	65
1251	CAT 2239	EC 393231	Good	51.8	3	Slight	46.6	9.7	5.98	60
1252	CAT 2258	G 2258	Poor	49.5	3		50	9.6	3.82	54
1253	CAT 2263	G 2263	Good	44.2	1.8	Slight	26.8	9.3	4.32	56
1254	CAT 2265	G 2265	Good	50.2	2.2		34.6	10.1	3.58	54
1255	CAT 23	AGS 118	Good			Slight		11.1	6	45
1256	CAT 2310	EC 456556	Very Good	64.4	1.4	Slight	18.4	11.6	4.68	54
1257	CAT 237	DCB 137	Very Good	39.4	3.4	Slight	22.6	15.2	3.42	48
1258	CAT 2387 A	EC 457214 (A)	Very Good	46.4	2.4		35.2	10.6	6.7	48
1259	CAT 2399	EC 457254	Very Good	48.4	1.6		17.6	16	7.92	45
1260	CAT 24	AGS 119	Very Good	47.2	3.2	Slight	33	12.9	6.6	50
1261	CAT 241	DCB 199	Very Good	57.2	3	Moderate	46	9.6	8.06	54
1262	CAT 243	DE 201	Very Good	62.4	3.4	Slight	28	11.5	2.94	50
1263	CAT 248	DN 290	Very Good	38.8	2.6	Slight	25.4	13.1	4.74	49
1264	CAT 248 A	DN 290	Good	32.2	1.4	Slight	14.8	13.3	3.62	36
1265	CAT 254	DS 201	Very Good	44	2.4	Moderate	21	6.9	1.12	55
1266	CAT 256	DS 205	Very Good	47.5	1.5	Slight	16	9.6	3.4	53
1267	CAT 258	DS 321	Good	62.4	3.4	Slight	31.2	11.2	5.82	50
1268	CAT 259 A	DS 327	Very Good	45	2	Slight	26.2	10.7	3.56	49
1269	CAT 259 B	DS 327	Good	52.4	2.2		26.4	8.4	2.92	55
1270	CAT 260	DS 366	Very Good	62.6	3	Moderate	30.4	6.7	2.38	67
1271	CAT 267	DS 74-20-2	Good	59.4	2.4		24.2	11.9	0.98	53
1272	CAT 275	EC 100778	Good	47.4	2.4	Slight	29.8	12.5	4.78	51
1273	CAT 283	EC 102612	Very Good	59.4	1.2	Moderate	28.8	10	4.22	54
1274	CAT 284 A	EC 103332	Very Good	58	1.5	Moderate	14	9.8	2.98	55
1275	CAT 284 B	EC 103332	Very Good	54.6667	3.33333	Slight	37.6667	9.9	3.3	56
1276	CAT 285	EC 103334	Very Good	74.2	3.4	Moderate	76.2	9.3	8.06	62
1277	CAT 286	EC 103336	Very Good	46.8	2.4	Moderate	30	11.1	3.36	54
1278	CAT 289	EC 106998	Very Good	59.2	2.4	Slight	31.6	11	3.74	57
1279	CAT 290	EC 107407	Very Good	62.2	2	Moderate	31.4	10.4	5.4	54
1280	CAT 292	EC 109540	Good	55.4	1.6	Slight	33.6	10.2	8.12	57
1281	CAT 294	EC 109543	Poor	31.6667	2.33333	Slight	32	13.9	2.76	52
1282	CAT 304	EC 113772	Very Good	67.25	3	Slight	61.25	10	2.68	54
1283	CAT 308	EC 113778	Very Good	59.5	3	Moderate	56.5	9.3	2.74	55
1284	CAT 309	EC 114527	Good	45.8	2.2		19.6	8.7	1.32	54
1285	CAT 312	EC 114572	Good	60	2.6	Moderate	29.6	7.3	3.62	61
1286	CAT 327	EC 16213	Very Good	48	3.2	Slight	27.8	10.6	5.08	49
1287	CAT 328	EC 163778	Very Good	64.6	3.8	Slight	62.6	10.8	3.44	55
1288	CAT 335	EC 172613	Very Good	51	1.8	Moderate	36.6	10	2.74	57
1289	CAT 338 A	EC 172663	Very Good	44.2	3.8	Severe	43.8	7.5	5.76	52
1290	CAT 338 B	EC 172663	Good	45.2	4.6		76.6	6.8	7.86	63
1291	CAT 339	EC 173325	Very Good	51.2	2.8	Moderate	26.6	9	3.68	52
1292	CAT 350	EC 18596	Good	60.8	3.2	Moderate	66.8	7.4	5.5	61
1293	CAT 351	EC 18670	Good	43.6	2.8		43.2	8.5	5.2	55
1294	CAT 355	EC 18737	Very Good	54.4	3.4	Moderate	56.2	8.7	5.9	53
1295	CAT 376	EC 241491	Very Good	46	2.4	Slight	27	9.7	4.18	50
1296	CAT 378	EC 241652	Very Good	50	2.75	Slight	36.5	8.8	4.62	52
1297	CAT 386	EC 241690	Very Good	58.4	3.6	Moderate	64.6	10.4	9.4	59
1298	CAT 387	EC 241695	Very Good	75.2	2.8	Severe	47.8	9.4	6.46	52
1299	CAT 390	EC 241708	Very Good	61.6	3.4	Slight	51	9.8	4.4	54
1300	CAT 391	EC 241709	Very Good	66	3.2	Moderate	50.2	8.6	5.3	54
1301	CAT 392	EC 241712	Good	86.25	2.25	Moderate	37.75	8.9	2	61
1302	CAT 396	EC 241750	Good	54.4	3.8	Slight	36	8.2	3.84	60
1303	CAT 424	EC 241823	Good	48.4	2.8		32.6	10	6.44	53
1304	CAT 431	EC 241917	Very Good	42	2.8	Moderate	31.2	12.7	4.22	54
1305	CAT 434	EC 241956	Good			Slight		11.1	6.26	50
1306	CAT 436	EC 241995	Very Good	54	3	Slight	28.6	13.3	2.98	53
1307	CAT 438	EC 242002	Good	38.6	2.4	Slight	32.4	11	5.12	52
1308	CAT 446	EC 242038	Good	38.8	3.4	Slight	40.2	11.6	2.5	50
1309	CAT 449 B	EC 242057	Poor	38.6	3.6		45.6	8.9	3.34	53
1310	CAT 451	EC 242072	Good	60.25	4.25	Slight	87.25	10.2	4.42	55
1311	CAT 455	EC 242086	Good	50.6	3.4		39.2	13.7	6.08	50
1312	CAT 456	EC 242091	Good	42.2	1.8		20.2	14.8	4.94	41
1313	CAT 461	EC 242105	Good	53.8	3.8	Moderate	46.4	7.8	3.24	56
1314	CAT 462	EC 242106	Poor	29.6	2.6	Slight	28.4	9.3	2.7	49
1315	CAT 463	EC 242108	Good	67.4	2.6	Slight	68.8	9.2	5.56	54
1316	CAT 472	EC 245985	Good	53	4	Slight	41.4	11.9	8.1	49
1317	CAT 478	EC 245995	Poor	31.4	2	Slight	34.8	10.1	2.58	57
1318	CAT 485	EC 250586	Good	58.2	2.4	Moderate	30.2	8.2	3.5	55
1319	CAT 493	EC 250616	Good			Slight		6	5.6	53
1320	CAT 497	EC 251292	Good	74	2.8	Slight	25.2	8.8	3.94	61
1321	CAT 498	EC 251295	Good	42.8	2.4	Slight	37.8	6.4	3.1	57
1322	CAT 516	EC 251367	Good			Slight		10.9	2.1	46
1323	CAT 518	EC 251372	Good	50.6	3.4	Slight	35.2	8.7	4.36	61
1324	CAT 50	AGS 158	Good					11.1	6.56	51
1325	CAT 528	EC 251383	Good	55.8	3.4	Slight	44.8	8.9	3.74	60
1326	CAT 531	EC 251396	Good	69.8	3	Moderate	49.8	9.5	5.74	55
1327	CAT 547	EC 251431	Poor	29.6	3	Slight	25.6	10.3	5.32	51
1328	CAT 55	AGS 164	Very Good	50	3	Moderate	47.6	8.9	5.94	58
1329	CAT 56	AGS 165	Poor	24.6	2	Slight	24	10.5	3.5	49
1330	CAT 560	EC 251470	Good	60.75	2.75		42.75	9.8	3.66	55
1331	CAT 570	EC 251501	Very Good	54	3.5	Slight	72.75	9.8	5.02	55
1332	CAT 582	EC 251525	Poor	29	3.2	Slight	37.4	9.8	5.74	53
1333	CAT 584	EC 251529	Poor	20.2	3.8	Slight	44	9.8	7.08	51
1334	CAT 605	EC 251876	Very Good	51.4	4.6	Moderate	47.8	10.4	5.06	53
1335	CAT 61	AGS 174	Very Good	47.6	2	Slight	31.4	9.6		51
1336	CAT 61 A	AGS 174	Very Good	49.2	2.4	Slight	23.6	11.8	0	51
1337	CAT 612	EC 260566	Very Good	34.8	4.6	Slight	49	7.9	5.72	46
1338	CAT 626	EC 274755	Good	58.5	4	Slight	46.5	9.3	4.16	55
1339	CAT 630	EC 280148	Very Good	62.2	4.2	Slight	63.2	9.8	5.8	57
1340	CAT 631	EC 280149	Very Good			Slight		10.3	4.54	54
1341	CAT 64	AGS 186	Very Good	48.6	2.4		24.4	10.4	3.74	48
1342	CAT 64 A	AGS 186	Good	62.6	3.2	Moderate	33.8	7.9	4.68	61
1343	CAT 640	EC 287466	Good	41.4	4.8	Slight	27.4	15	4.28	53
1344	CAT 641	EC 287468	Good	50.2	3.2	Slight	32	10.2	3.82	61
1345	CAT 642	EC 287469	Very Good	73.8	2.6	Moderate	44	9.5	5.64	60
1346	CAT 65	AGS 190	Very Good	41.6	3.2		26.6	11.9	4.78	46
1347	CAT 652	EC 291397	Very Good	43.25	2.5		32.75	10.6	3.74	49
1348	CAT 653	EC 291398	Very Good	62.4	2.4	Moderate	37.2	9.6	2.26	55
1349	CAT 654	EC 291399	Very Good	56	2.8	Slight	34.2	9.4	3.94	59
1350	CAT 655	EC 291400	Very Good	78.3333	3.33333	Moderate	61.6667	10.4	2.5	60
1351	CAT 656	EC 291401	Very Good	74.2	3	Moderate	45.2	11	3.96	55
1352	CAT 657	EC 291403	Very Good	50.8	4	Moderate	42.8	8.2	4.28	57
1353	CAT 660	EC 291448	Very Good	55.6	2.6	Moderate	36.8	9.8	4.1	56
1354	CAT 661	EC 291451	Very Good	56.2	2.8	Severe	60.2	10.4	6.94	55
1355	CAT 663	EC 291453	Very Good	73.4	2.6	Slight	45.4	6.5	3.98	63
1356	CAT 668	EC 308287	Very Good	49	3	Moderate	40.6	9.8	5.3	57
1357	CAT 678	EC 308327	Good	47.25	4.75	Slight	49.25	11.8	6.12	50
1358	CAT 679	EC 308328	Very Good	60.8	3.6	Severe	37.6	7.4	2.82	61
1359	CAT 680	EC 308334	Good	52.5	3.5		30	9.6	3.3	49
1360	CAT 685	EC 309509	Very Good	63.2	4.6	Moderate	59.6	10.2	4.48	55
1361	CAT 688	EC 309512	Good	57.4	2.4		26.6	14.2	4.34	52
1362	CAT 692	EC 309518	Good	50	3.33333		20.6667	13.5	4.6	53
1363	CAT 702	EC 309535	Poor	44.25	5.5		58.25	9	2.1	57
1364	CAT 705	EC 309540	Poor	48.8	3		63.2	6.3	4.8	54
1365	CAT 706	EC 309541	Poor	67.25	5.25	Slight	75.75	9.1	5.26	60
1366	CAT 708	EC 309543	Poor	54	4		53.6	8.9	5.44	54
1367	CAT 711	EC 30967 A	Very Good	65.6	2.8	Moderate	45.8	8.7	6.58	54
1368	CAT 719	EC 313974	Very Good	61.4	3.4	Moderate	63	7.3	4.64	58
1369	CAT 72	AGS 218	Very Good	79	2.6	Slight	55	6.4	6.1	57
1370	CAT 73	AGS 219	Very Good	57.4	2.2	Slight	25.8	13.5	5.4	50
1371	CAT 732	EC 325097	Very Good	67.8	3	Slight	71.8	9.5	8.3	56
1372	CAT 737	EC 325102	Good	28.4	3.6	Slight	35.4	11.4	9.48	40
1373	CAT 738	EC 325103	Very Good	51.8	3.6	Slight	44.2	11.7	9.52	52
1374	CAT 739	EC 325104	Good	83	2.8	Slight	31.8	8.3	1.96	36
1375	CAT 742	EC 325107	Good	54	4	Slight	47.2	9.8	6.04	54
1376	CAT 748	EC 325113	Very Good	88.8	2.8	Moderate	35.2	6.6	1.6	63
1377	CAT 75	AGS 226	Good	79.2	5.6	Moderate	60.2	6.7	2.46	62
1378	CAT 76	AGS 227	Good	61.6	3.8	Slight	46.8	8.9	5.38	56
1379	CAT 764	EC 333859	Very Good	60.4	3.6	Slight	40.4	8.9	3.38	52
1380	CAT 776	EC 333872	Good	45.2	3.2		33.6	7.2	2.12	67
1381	CAT 776 A	EC 333872	Good	34.8	4.4		41.2	7.9	6.12	54
1382	CAT 776 B	EC 333872	Good	47.6	5.4	Slight	51	8.8	7.14	53
1383	CAT 776 C	EC 333872	Good	48.8	3.2	Slight	48.6	9.1	7.16	55
1384	CAT 779	EC 333875	Poor	37.4	5.6	Slight	96.2	7.7	7.86	60
1385	CAT 782	EC 333878*	Poor	49.6667	5.33333		83	7.6	2.02	66
1386	CAT 782 A	EC 333878*	Poor	50.8	2.6	Slight	37	7.4	2.54	58
1387	CAT 783	EC 333879	Good	60	3.8		67.6	9.7	9.34	54
1388	CAT 785	EC 333881	Good	49	4.5		78.5	8.9	4.58	53
1389	CAT 786	EC 333882	Poor	15	3.33333	Slight	27	15.1	4.04	44
1390	CAT 790	EC 333886	Poor	21	3.5	Slight	22.5		0	51
1391	CAT 794	EC 333890	Good	35.2	3.8	Slight	32.4	12.4	7.44	46
1392	CAT 796	EC 333892	Good	58.5	3.25	Slight	69.5	10.7	5.9	54
1393	CAT 797	EC 333893	Poor	38.6667	1.33333	Slight	32.6667	9	1.92	43
1394	CAT 803	EC 333899	Good	41.6	1.6	Slight	34.4	13.2	8.82	36
1395	CAT 808	EC 333904	Poor	23.8	2	Slight	36	10.7	11	39
1396	CAT 809	EC 333904 A	Poor	23.5	2.5	Slight	18.5		0	47
1397	CAT 815	EC 333911	Poor	20.2	4.2	Slight	47.2	11.1	0	42
1398	CAT 816	EC 333912	Poor	23.75	4.5	Slight	44.75	11.2	0	46
1399	CAT 818	EC 333914	Poor	29	5.4	Slight	70	10.1	11.74	58
1400	CAT 828	EC 333924	Poor	18	1	Slight	27.4	9.8	2.82	38
1401	CAT 831	EC 333927	Good	53.8	2.2	Slight	52	8.7	8.5	52
1402	CAT 833	EC 333929	Good	55.8	4	Moderate	59.6	9.2	7.8	53
1403	CAT 842	EC 333938	Good	44.6	5.2		53.6	10.6	7.5	51
1404	CAT 843	EC 333939	Good	87.2	3	Slight	48.8	7.1	5.9	67
1405	CAT 849	EC 34060	Good	64.6	4.2	Moderate	58.4	5.8	4.14	66
1406	CAT 853	EC 34079 B	Good	41	3.4	Slight	26.2	7.4	4.08	37
1407	CAT 857 A	EC 34115	Good	61.8	3.4	Slight	58.4	9.4	5.4	57
1408	CAT 857 B	EC 34115	Good	51.6	4.2	Slight	54.2	7.5	0	51
1409	CAT 863	EC 34504	Good	68	4.8	Slight	69.6	11.8	7.72	62
1410	CAT 872 B	EC 37104	Good	36.4	3.4		29	10	3.76	48
1411	CAT 874	EC 37330	Good	63.6	3.6	Slight	49	7.4	4.24	71
1412	CAT 878	EC 39044	Good	64.2	3.2		39.2	9.4	5.04	56
1413	CAT 88	AGS 39	Poor	32.8	4.2		48	9.1	4.26	57
1414	CAT 884	EC 39049	Good	49.6	3.8	Slight	29.4	8.7	2.5	56
1415	CAT 885	EC 39107	Very Good	59.25	2.75	Slight	33	8.9	2.32	57
1416	CAT 888	EC 39219	Good	43.6	6		44.6	8	7.46	51
1417	CAT 889	EC 39222	Good	32.6	2.6	Slight	26	7.8	3.84	52
1418	CAT 894	EC 39495	Good	83.2	3.2	Slight	32.8	7.5	2.76	60
1419	CAT 897	EC 39508	Good	52.4	2.6	Slight	31.6	6	2.88	57
1420	CAT 90	AGS 41	Poor	47	2		34.2	7.6	5.76	56
1421	CAT 900	EC 39513	Good	57	1.66667	Moderate	20.6667	6.7	0.42	60
1422	CAT 904	EC 39743	Good	46.2	2.8	Slight	21	11.1	2.48	54
1423	CAT 906	EC 39753	Good	62.5	2	Moderate	29.5	7.7	1.4	55
1424	CAT 907	EC 39754	Very Good	66	3.2	Moderate	23.4	6.9	2.66	56
1425	CAT 908	EC 39755	Good	63.2	3.4	Moderate	31.4	6.7	3.28	57
1426	CAT 909	EC 41318	Good	85	1.2	Moderate	32.8	7.8	3.14	67
1427	CAT 910	EC 41319	Poor	60	2.66667	Moderate	48	7.4	1.64	69
1428	CAT 911	EC 41322	Good	73.3333	2.33333	Moderate	22	6.9	1.5	70
1429	CAT 913	EC 4435	Good	71.5	4	Moderate	50.75	7.6	4.7	62
1430	CAT 914	EC 49866	Good	63.6	2.8		50.4	9.1	3.66	55
1431	CAT 915	EC 54776	Poor	50.6	3.8	Slight	47.6	10	8.82	44
1432	CAT 917	EC 55886	Poor	72.6	4.4	Moderate	23	6.1	0.98	66
1433	CAT 918	EC 76757	Good	64	1		17.5	6.8	1.24	58
1434	CAT 920	EC 76758	Good	68.8	3.4	Slight	48.8	8.1	4.42	55
1435	CAT 921	EC 76759	Good	92	4.25	Slight	32	7.1	1	67
1436	CAT 922	EC 77210	Good	38.6	4.2	Moderate	40.6	9.6	5.48	47
1437	CAT 923	EC 9309	Good	59.2	1.8	Slight	34.2	8.7	3.88	57
1438	CAT 926	EC 93413	Good	76.8	1.8	Moderate	46.4	9	5.32	71
1439	CAT 927	EC 93601	Good	33.8	4.4		37.2	9.6	5.2	52
1440	CAT 928	EC 93742	Good	71.2	1.4		35.2	7.6	3.52	56
1441	CAT 935	EC 95297	Good	68.4	3.4	Slight	37.4	7.5	2.96	63
1442	CAT 939	ELGIN	Very Good	49.6	2.8	Slight	28.4	9.9	4.1	47
1443	CAT 940	ELGIN (S)	Very Good	44.5	3.5	Slight	27.5	10.7	4.9	46
1444	CAT 941 A	EPS 1	Very Good	41.8	5.6		54.4	11	6.8	44
1445	CAT 941 B	EPS 1	Very Good	48.4	3.6		52	9.8	7.88	48
1446	CAT 944	EPS 335	Very Good	67	4.2	Moderate	50.4	10.2	7	48
1447	CAT 945 B	EPS 472	Very Good	53.25	1.5	Moderate	26	11.5	5.1	48
1448	CAT 946	EPS 5	Good	49.6	3.6		37.2	7.8	2.26	60
1449	CAT 946 B	EPS 5	Very Good	58.4	4.6		44	10.4	5.82	54
1450	CAT 950	F 67-3975	Very Good	47.2	4.8		29	9.8	5.24	54
1451	CAT 953	FASSY COOK	Very Good	52	3.8	Slight	39.2	11	6.62	52
1452	CAT 954 B	G 110	Very Good	49.2	2.8		38	10.1	4.42	54
1453	CAT 955	G 194	Very Good	44.6	3.2	Slight	48.6	10.9	6.82	53
1454	CAT 957	G 47	Very Good	58.2	2.6	Moderate	43.2	8.8	4.82	54
1455	CAT 959	GC 40030-4	Good	66.6	3	Moderate	35.8	6.8	1.48	62
1456	CAT 966	GC 50218-44	Very Good	44.2	4	Slight	28.8	8.6	3.64	52
1457	CAT 967	GC 562-86-6	Very Good	61.2	2		20.4	12.7	5.36	51
1458	CAT 97 B	AGS 50	Very Good	53.8	2.4	Slight	31.2	9.8	4.34	51
1459	CAT 971	GP 2	Very Good	72	3.2	Moderate	63	6.4	1.42	63
1460	CAT 972	GP 20	Very Good	59	3	Moderate	34	7.2	2.86	67
1461	CAT 974	GP 25	Good	34.4	2.6	Slight	34.2	7.5	6.22	52
1462	CAT 980	GP 4	Good	65	3.25	Moderate	37	6.5	3.22	70
1463	CAT 984	GP 7	Good	72	2.4	Slight	47.8	7.1	2.98	67
1464	CAT 993 A	GPC 34	Good	78.2	2		32.4	7.4	0.64	67
1465	CAT 998	Ga 48	Good	65	5.4	Moderate	63.8	8.2	5.26	57
1466	CAT 999	Ga 82-8304	Good	67.6	4.6	Slight	76.2	6.2	7	66
1467	CAT 215	CHICO	Good	59.4	3.2	Slight	41.4		0	53
1468	DS 2309	DS 2309	Very Good	52.4	2.4		26.2	10.1	5.02	52
1469	DT 21	DT 21	Very Good	55	2.6		36.6	12.5	6.34	47
1470	EC 100027	EC 100027	Very Good	56.2	3		33.8	11.6	6.66	47
1471	EC 107416	EC 107416	Very Good	43.5	3.25	Slight	41.5	11.9	0	48
1472	EC 14476	EC 14476	Very Good	71.2	2.6	Moderate	44.8	9.6	3.54	52
1473	EC 241656	EC 241656	Very Good	56.6	2.6		36.2	10.2	4.86	51
1474	EC 241780	EC 241780	Good	81	3.8	Slight	36.8	10.4	2.38	63
1475	EC 274747	EC 274747	Good	63.2	3	Slight	47.4	9.2	2.9	50
1476	EC 287754	EC 287754	Good	42.4	3.6		31.4	9.8	6.4	53
1477	EC 333903	EC 333903	Very Good	40.75	3.5	Slight	32.5	11.9	5.682	50
1478	EC 33940	EC 33940	Very Good	70.8	2.8	Moderate	45.8	10.2	10.28	54
1479	EC 34057	EC 34057	Very Good	60.2	3	Slight	31	10.6	5.18	51
1480	EC 383165	EC 383165	Very Good	65.6	3.2	Slight	36.8	11.2	6.92	51
1481	F4 P21	F4 P21	Very Good	58.4	2.4		41.2	10.2	2.8	60
1482	G 02510	G 02510	Very Good	65.8	3.6	Moderate	46.2	9.6	4.62	54
1483	G 03465	G 03465	Very Good	64	3	Slight	46.6	11	3.48	58
1484	G 03508	G 03508	Very Good	51	3.8		40.6	12.2	8.42	50
1485	G 03750	G 03750	Very Good	43.6	4.2	Slight	43	14.6	2.88	43
1486	G 10143	G 10143	Very Good	63.4	3.2	Severe	44.8	6.7	2.4	61
1487	G 10222	G 10222	Very Good	60	5.33333		62.6667	8.4	8.5	54
1488	G 10525	G 10525	Very Good	75.25	3.75	Moderate	49.75	7.7	5.1	68
1489	G 2225	G 2225	Very Good			Moderate		7.4	6.54	75
1490	G 288	G 288	Very Good	59.2	4	Severe	56.8	9.9	3.02	52
1491	G 8586	G 8586	Good	78.8	2	Severe	27.4	8.3	0.52	58
1492	G 9956	G 9956	Very Good	61	3.4	Moderate	55	9	4.1	61
1493	G4 P15	G4 P15	Very Good	50.6	4	Slight	45.4	11.5	8.36	52
1494	GC 457405	GC 457405	Very Good	62.6	3.4	Slight	35	10.2	1.96	50
1495	GC 58037-2-3-51	GC 58037-2-3-51	Very Good	62.5	2.5	Slight	35.5	8.9	2.12	52
1496	GOURAV	GOURAV	Very Good	65	4	Severe	52.2	8	4.78	51
1497	GP 448	GP 448	Very Good	28.2	2.6	Slight	38.6	11.1	17.12	56
1498	GP 489	GP 489	Very Good	43.6	3	Moderate	27.2	10.4	5.52	50
1499	GP 67	GP 67	Very Good	68	3.6	Slight	32.2	10.3	4.18	54
1500	HARDEE	HARDEE	Very Good	66.3333	2.66667	Slight	10.6667	14.4	2.26	60
1501	CAT 1010	HIMSO 175	Very Good	67.6667	2.33333	Moderate	36.6667	10.9	3.92	53
1502	K 51	K 51	Good	64.25	2	Moderate	23.25	11.7	4.96	51
1503	K 53	K 53	Good	52.6	3.8	Slight	26.8	8.2	3.44	54
1504	K 88-262 A	K 88-262 A	Good	53	1.8	Slight	27	9.1	3	58
1505	KDS 256	KDS 256	Very Good	67.2	3.6		52.2	8.9	10.02	51
1506	KDS 321	KDS 321	Very Good	51.6	2.8	Slight	40.8	9.7	5.24	53
1507	NLS 11 B	NLS 11 B	Very Good	69.4	3.2	Moderate	35.6	8.7	2.68	56
1508	P 426 B	P 426 B	Very Good	45.25	2.25	Slight	34.75	11.5	3.3	51
1509	PCPGR BHATT 5464	PCPGR BHATT 5464	Very Good	68	3	Slight	45.3333	9.9	2.7	57
1510	PLSO 637	PLSO 637	Very Good	42.2	2		15	11.3	3.58	52
1511	PP 14	PP 14	Very Good	50	2.4		20.4	11.7	0	52
1512	PP 19	PP 19	Very Good	61.2	4	Moderate	55.6	9.8	3.38	53
1513	PP 25	PP 25	Good	60.25	3.5		48.5	11.2	2.64	52
1514	PP 26	PP 26	Good	42.6	3.6		33.2	6.4	2.48	58
1515	PP 39	PP 39	Very Good	33.2	2.6	Slight	22	9.7	4.12	51
1516	PR 72-2-5-6	PR 72-2-5-6	Very Good	59.2	2.6	Slight	40.8	8.7	8.16	62
1517	RKS 27	RKS 27	Very Good	62.4	3.4	Slight	36.2	9.4	5.18	58
1518	RPSP 935 E	RPSP 935 E	Good	50	3		28.2	9.2	3.78	61
1519	SKY/AK 403	SKY/AK 403	Very Good	59.6	3.8	Slight	43.8	11.7	8.1	62
1520	SL (E) 1	SL (E) 1	Good	49.2	3		28.4	9.7	3.8	44
1521	SPEC 56 A	SPEC 56 A	Good	46.5	3.5		29	8.5	2.78	52
1522	SQL 34	SQL 34	Very Good	58.8	2.8	Slight	23.4	10.9	2.4	50
1523	SQL 37	SQL 37	Very Good	46.4	3.4	Slight	30.2	9.9	3.24	53
1524	SWARN VASUNDHARA	SWARN VASUNDHARA	Poor	29	3		36		0	45
1525	CAT 2092	VP 1165	Poor	37.5	4	Slight	82	7.9	0	53
1526	WT 88	WT 88	Very Good	54.6	3.8	Slight	33.8	11.9	6.14	50
1527	CAT 2809	EC 528623	Good	48.6	1.6	Slight	13.4	11.5	0.82	47
1528	CAT 2885	EC 538801	Good	64.6667	2.66667	Slight	33.3333	11.1	2.6	58
1529	CAT 2825 A	EC 528639	Very Good	58	3.4	Slight	47.6	10.7	3.36	53
1530	CAT 2810	EC 528624	Poor	44.3333	3.66667		33.3333	15.4	1.52	52
1531	CAT 2899	EC 538814	Good	48	2		29	9.6	3.58	54
1532	CAT 2858	EC 528675	Good			Slight		6.3	5.34	72
1533	CAT 2826	EC 528640	Good	47	2.4	Slight	21.4	10.4	2.1	57
1534	CAT 2806	EC 528620	Good	39.6	2.4	Slight	28.8	16	5.26	50
1535	CAT 2851	EC 528666	Good	65.2	5		65	7.2	7.76	76
1536	CAT 2932	EC 542435	Good	47	3.2		25.8	16	1.84	51
1537	CAT 2913	EC 538830	Good					7.6	3.74	41
1538	CAT 2927	EC 542428	Good	41.25	3.25	Slight	43.25	10.1	5.78	52
1539	CAT 2903	EC 538818	Poor	38.6	3.8	Slight	38.8	13.1	7.7	51
1540	CAT 2940	EC 546881	Good	54.25	3.5	Slight	34	14.3	6.08	40
1541	CAT 2922	EC 538840	Very Good	72	3	Slight	38.6	10	7.92	53
1542	CAT 2917	EC 538834	Poor	18.2	2.2	Severe	17.6	7.7	1.72	39
1543	CAT 2722	EC 481571	Very Good	75.6	3.2	Slight	42	6.6	3.76	53
1544	CAT 2761	KT SURAJ SINGH	Good	52.2	1.6	Moderate	11.6	9	1.46	52
1545	CAT 2722 A	EC 481571	Very Good	53.4	2.6	Severe	51.4	3.2	6.42	53
1546	CAT 3150	EC 572136	Good	47.8	2.6	Slight	27.8	12.5	9.16	49
1547	CAT 3144	EC 572130	Poor	31.6	3	Slight	56.8	12.5	5.48	48
1548	CAT 3144 A	EC 572130	Poor	49.4	6.2	Slight	81.6	5.9	5.8	56
1549	CAT 3201 A	EC 572187	Very Good	42.6	1.2		19	20.4	5.56	35
1550	CAT 3219	EC 581521	Good	60	3	Slight	65.6667	9.9	2.74	58
1551	CAT 3230	EC 590225	Poor	72.6	2.6	Slight	35.6	7.1	2.56	66
1552	CAT 395	EC 241715	Poor	57.6	2.6		31.4	6.3	1.48	59
1553	PK 546	PK 546	Poor	31	3.6	Slight	36	9.6	4.1	54
1554	PS 1395	PS 1395	Good	18.75	2.25	Slight	25.5	9.3	3.5	54
1555	PS 1467	PS 1467	Good	31	3.75	Slight	16.5	9.1	1.18	57
1556	PS 96	PS 96	Very Good	66.4	3.2	Moderate	51.6	7.7	4.52	55
1557	PS 1485	PS 1485	Very Good	47.5	3.5	Slight	41	11	6.3	56
1558	PK 1266	PK 1266	Good	45.2	3	Slight	35	10.8	4.94	55
1559	PS 1484	PS 1484	Very Good	45.8	3.8		41	9.4	4.98	52
1560	PS 1504	PS 1504	Very Good	42.75	5		27.75	8.9	2.54	54
1561	PK 1241	PK 1241	Very Good	80.6667	3.33333	Slight	31	8.9	2.22	55
1562	PS 1386	PS 1386	Very Good	43.5	3.75		40.25	18.2	2.52	54
1563	PS 1486	PS 1486	Very Good	43.6	2.6	Slight	24.2	9.6	2.58	50
1564	CAT 544	EC 251417	Good	67.5	2	Slight	33	6.3	1.02	67
1565	PK 1174	PK 1174	Good	37.75	3.25		49.25	7.7	2.42	55
1566	PK 1324	PK 1324	Good	51.8	3.8	Slight	32.2	8.6	3.2	68
1567	PS 1384	PS 1384	Very Good	43.6	4.2		43.2	9.3	4.34	54
1568	CAT 589	EC 251776	Very Good	57.8	2.4	Moderate	28.6	6.7	2.28	66
1569	PS 1392	PS 1392	Very Good	39.8	2.2	Slight	16.8	9.4	2.56	50
1570	CAT 330	EC 171536	Good	65	3.8	Slight	50.6	7.1	7.64	71
1571	CAT 362	EC 232084	Good	47.8	1.4		13.6	11.1	2.12	51
1572	PS 1483	PS 1483	Good	38	3.8	Slight	35.2	9.5	4.22	54
1573	PS 1481	PS 1481	Poor	37.75	3	Slight	18.25	10.8	2.9	52
1574	PK 1276	PK 1276	Poor	27	3.6	Slight	28.8	9.3	2.76	52
1575	CAT 354	EC 18735	Good	34	3.4	Slight	35	9.3	3.96	51
1576	CAT 323 A	EC 15553	Very Good	77	3.75	Severe	43.5	5.5	1.4	63
1577	CAT 403	EC 241761	Very Good	62.6	2.4	Slight	34.4	7.7	3.1	67
1578	CAT 402	EC 241760	Very Good	71.2	3.2	Moderate	44.8	9.2	3.7	56
1579	CAT 430	EC 241913	Poor	57	4		52.6	7.8	3.14	67
1580	PS 1472	PS 1472	Good	31	3.8		47.2	8.8	4.96	55
1581	CAT 506 A	EC 251334	Good	52.8	3.6	Slight	38.8	7.2	2.18	55
1582	PK 1217	PK 1217	Very Good	38.6	3.4	Slight	27.6	8.5	4.32	48
1583	CAT 1876	TGX 854-88 E	Poor	47.25	5.5	Slight	38.25	6.4	2.02	74
1584	CAT 1875	TGX 854-88 D	Poor	48	5.8	Slight	67.2	8.8	3.48	67
1585	CAT 1873	TGX 854-77 D	Good	62.25	3.25	Slight	42	5.1	1.94	67
1586	CAT 1818	TGX 844-313 E	Poor	45.8	3.4	Moderate	29.4	5.7	1.76	63
1587	CAT 412	EC 241780	Good	59.8	3.6	Slight	40	10.5	5.98	64
1588	CAT 428	EC 241864	Good	38.8	4		26.8	6	2.26	66
1589	CAT 480	EC 250577	Good	63	3.4	Slight	27.2	7	2.4	61
1590	CAT 439	EC 242003	Good	43	3.4	Moderate	48.6	9	4.34	58
1591	CAT 433	EC 241942	Good	74	3.66667	Moderate	46.6667	6.8	1.88	70
1592	CAT 440	EC 242004	Good	79.8	4.2	Slight	56.4	7	3.44	36
1593	CAT 440 B	EC 242004	Very Good	52.25	5	Severe	35.25	7.7	1.9	57
1594	CAT 445	EC 242027	Good	35	4	Moderate	113	5.8	4.78	60
1595	CAT 1817	TGX 844-313 D	Good	61	3.6	Slight	41.6	5.9	3.98	66
1596	CAT 1809	TGX 825-17 D	Poor	35.75	3.5		34	6.8	1.56	57
1597	CAT 1837	TGX 849-347	Good	57.4	4.2	Slight	28.2	6.7	2.2	68
1598	CAT 1832	TGX 849-309 D	Poor	40.8	3.2		34	6.5	2.04	35
1599	CAT 1833	TGX 849-309 D1	Good	43.4	4.8	Slight	47	5.9	3.78	63
1600	CAT 1844	TGX 849-99 D	Poor	48.6667	5.33333		45.6667	5.1	0	35
1601	CAT 1852	TGX 854-25 D	Very Good	66	2.66667	Moderate	16.6667	6.3	0.4	62
1602	CAT 1855	TGX 854-28 D	Good	38.2	5.4		57.2	5.2	2	66
1603	CAT 1854 A	TGX 854-28 A	Good	47.8	5.2	Slight	33.8	5.7	1.72	75
1604	CAT 1856	TGX 854-28 E	Good	59	1	Slight	29.6667	4.6	1.18	64
1605	CAT 247	DM 5133 G	Good	58	3	Moderate	35	5.1	0.8	70
1606	CAT 261	DS 396	Poor	55.75	2.75	Moderate	51.25	5.3	2.26	64
1607	CAT 213	C 3-22-2	Good	73.3333	2.33333	Moderate	31.6667	5.5	1.82	62
1608	CAT 207	BRG 8	Good	62.2	2	Slight	24	7	2.18	56
1609	CAT 255	DS 203	Very Good	81.25	2.75	Moderate	50.5	6.1	1.76	58
1610	CAT 244	DH 4	Good	68	3	Moderate	27	6.3	0.88	64
1611	CAT 242	DD 1004	Good	83.5	5.75	Moderate	46	7.1	2.96	64
1612	CAT 1149	J 732	Very Good	57.6	3.2	Slight	59.4	8.2	5.62	55
1613	CAT 1144	IPBSY 159	Poor	58.3333	4	Moderate	39.6667	6.6	1.56	54
1614	CAT 1143	IPBSY 158	Good	80	3	Moderate	37.5	5.1	0	63
1615	CAT 1054	IC 15975	Poor	40.2	5.2		47.6	6.3	3.46	59
1616	CAT 1080	IC 18743	Very Good	45.6	2.4		23	9.9	3.36	49
1617	CAT 2503	EC 467282 B	Very Good	66.8	2.4	Severe	43	6	3.4	50
1618	CAT 1877	TGX 855-105 D	Poor	56.4	3.6		41.2	6.4	2.94	68
1619	CAT 1825	TGX 849-207 D	Poor	57.6	6.2	Slight	75.6	6.3	4.6	50
1620	CAT 1862	TGX 854-4 F	Poor	57.8	4.2	Slight	55.8	7.8	5.12	54
1621	CAT 1803	TGX 824-34 C	Poor	47.8	6.8		66.4	6	4.2	65
1622	CAT 1827	TGX 849-249 D	Poor	50.2	3.8		37.4	6.4	0.84	75
1623	CAT 1807	TGX 824-35 E	Good	52.8	5.4		70.4	7.6	6.38	56
1624	CAT 1828	TGX 849-25 D	Good	65.25	4.25	Slight	79.5	6.9	4.66	67
1625	CAT 810	EC 333905				Slight		10.7	3.22	33
1626	CAT 870	EC 37072	Very Good	84.2	5.2	Moderate	67	7.8	6.72	62
1627	CAT 898	EC 39511	Good	31.4	3	Severe	33	5	6.68	39
1628	CAT 812	EC 333908	Poor	20	3.6	Slight	37.2	8.1	8.48	39
1629	CAT 813	EC 333909	Poor	19.8	3.4	Slight	42.6	8.9	3.26	40
1630	CAT 817	EC 333913	Very Good	44	4.4	Slight	51.2	8.7	4.34	58
1631	CAT 973	GP 23	Very Good	68	2.8	Slight	34.8	6.7	2.44	68
1632	CAT 979	GP 38	Very Good	76.8	6.2	Moderate	76.4	6.9	6.44	62
1633	CAT 1111	IC 47393	Good	57.8	5.2		68	7.2	5.38	60
1634	JS 20-59	JS 20-59	Poor	33.5	4.75	Slight	39.75	8.2	1.68	56
1635	SQL 1	SQL 1	Poor	21.6667	4	Slight	44	9.3	2.72	50
1636	SQL 39	SQL 39	Poor	19.6	5	Slight	52.2	9.9	8.68	45
1637	JS(SH) 96-04	JS(SH) 96-04	Good	34	3	Slight	50.8	10.8	8.72	51
1638	PS 1327	PS 1327	Good	39	4.6		55.4	7.5	7.28	51
1639	IC 13006	IC 13006	Good	76.2	2.8	Moderate	32.2	7	2.9	63
1640	IC 75159	IC 75159	Good	70.6	3.8	Slight	43.4	6.6	2.1	55
1641	IC 15554	IC 15554	Poor	57.6	5.2	Slight	38		0	57
1642	CAT 1053	IC 15974	Good	59.6	4.6	Slight	68	6.1	5.42	67
1643	CAT 1056	IC 15977	Good	54.8	2.8	Slight	42.2	6.5	3.48	67
1644	CAT 12	AGS 108	Very Good	65.3	2.3	Slight	27.3	7.5	1.8	70
1645	CAT 14	AGS 11	Very Good	55	2		33.7	8.3	1.7	56
1646	CAT 1147	J 122	Very Good	80.25	2	Moderate	54.75	10.7	4.74	56
1647	CAT 1089	IC 24055	Very Good	53.2	3.4	Moderate	36.8	6.8	1.48	68
1648	CAT 985	GP 8	Poor	42.75	5.25	Slight	38.25	7.4	3.4	69
1649	SQL 94	SQL 94	Poor	21	3.4	Slight	19.2	9.6	3.92	47
1650	CAT 1133	ICAL 138	Poor	67.2	3	Slight	47.4	6.5	0.66	63
1651	CAT 1047	IC 15944	Very Good	55.25	3	Moderate	18.5	6.1	2.64	64
1652	CAT 1126	I GAL 123	Very Good	56.2	2.8	Slight	43.4	5.9	1.32	62
1653	CAT 1123	IC 9463	Very Good	46.2	2.2	Moderate	32	9.1	1.5	52
1654	CAT 1110	IC 47392	Poor	26.2	1.8	Slight	14.8	8	0.54	48
1655	CAT 1101	IC 41681	Poor	32.6	1.4	Slight	25.4	8	3.88	35
1656	CAT 1880	TGX 855-44 D	Poor	37	8.5		55	6.2	0.86	76
1657	CAT 2046	GC 11	Poor	44.75	4.25		54.25	10.8	6.94	58
1658	JS(SH) 98-22	JS(SH) 98-22	Good	33.8	6.2	Slight	41	8.8	7.08	52
1659	CAT 2018	EC 357990	Good	41	1.8		21.4	7.9	2	67
1660	CAT 2049	GC 15	Good	33.2	3		29.2	9.1	2.48	58
1661	CAT 1064	IC 15994	Poor	66.25	5.5	Slight	38.5	5.3	0	70
1662	CAT 1048	IC 15962	Poor	70	2.4	Slight	38.8	6.6	2.24	64
1663	CAT 1004 A	HIMSO 1516	Very Good	43.75	3.5		46.75	7.6	3.32	54
1664	CAT 1004	HIMSO 1516	Good	67.4	2.8	Slight	44.8	6	1.7	59
1665	CAT 1040	IC 15557	Good	71.4	2.6	Slight	52	7.8	6.08	53
1666	CAT 1043	IC 15759	Very Good	54.6	3.8	Slight	35.4	6.8	3.34	72
1667	CAT 1019	IC 100497	Very Good	82.25	4	Moderate	45.5	5.9	2.04	68
1668	CAT 1017	HM 1	Very Good	61.3333	3.33333	Slight	32.3333	5.6	1.72	63
1669	CAT 1013	HITOSYOSHI	Very Good	68	3.33333	Moderate	22	5.5	1	64
1670	CAT 1904	TGX 863-26 A	Poor	66.6	5	Moderate	37.6	6.2	1.8	64
1671	CAT 1905	TGX 863-26 D	Poor	32.2	3.8		32.2	5.9	1.34
1672	CAT 1910	TGX 885-44 C	Good	57	4.6		57.8	8	4.5	66
1673	CAT 1866	TGX 854-60 E	Good	70.5	6	Moderate	54.5	5.5	1.92	74
1674	CAT 1890	TGX 85B-48	Poor	36	3.4		34.4	7.6	3.36	54
1675	CAT 1893	TGX 86-24	Poor	40.8	2.2		28.2	8.7	2.02	48
1676	CAT 2892	CAT 2892	Good	49.4	3.2		31.8	6.9	2.52	57
1677	CAT 2087	VP 1157	Very Good	74.3333	4.66667	Moderate	25.6667	6.7	0.64	61
1678	CAT 1865	TGX 854-60 A	Poor	47.4	4.8	Slight	58.2	7.8	7.14	64
1679	CAT 1872	TGX 854-71 E	Poor	68.6	4.4	Slight	39.2	7.3	1.82	60
1680	CAT 1918	TGX 995-17 B	Poor	39.8	2.2		34.6	7.4	3.08	55
1681	CAT 1911	TGX 885-44 E	Poor	51	4.6		68.6	7.1	7.04	66
1682	CAT 1026	IC 13009	Poor	70.3333	3.66667	Slight	56.6667	6.4	3.06	63
1683	CAT 1023	IC 13004	Good	54.4	3.8		42.6	6.3	3.72	67
1684	CAT 1021	IC 100781	Good	48.8	2.2	Slight	56.6	5.8	3.42	63
1685	CAT 1192	JS 81+D2549-397	Very Good	70	5.8	Moderate	60.4	5.3	0.52	71
1686	CAT 1155	JP 6	Good	66	4.66667	Moderate	74	6.5	3.36	63
1687	CAT 1156	JS 140	Good	35.2	3.6	Slight	31	9.2	4.94	55
1688	CAT 956 A	G 2251	Poor	55.2	6.6		37.6	6.9	2.32	71
1689	CAT 968	GC 60115-8	Good	60.8	3.8	Slight	34.2	6.4	1.64	62
1690	CAT 969	GC 60689-6	Good	53.75	3.25		27	6.9	3.62	64
1691	CAT 970	GP 14	Poor	57	3.8	Slight	45.2	6.9	4.3	64
1692	CAT 991 A	GPC 30	Poor	41.6	5.6		89.2	7.6	9.58	61
1693	CAT 991 B	GPC 30	Poor	37.6	7.4		52.2	7	2.62	59
1694	CAT 992	GPC 32	Good	53.25	3.5		49.25	6.1	2.88	57
1695	CAT 995	GPC 87	Good	47	3.2	Slight	15	7.3	2.2	63
1696	CAT 996	GPC 94	Poor	32.6667	4	Slight	40.6667	7.6	0.56	53
1697	CAT 62	AGS 183	Good	19.5	1.75	Slight	21.5	9.5	2.42	45
1698	CAT 35	AGS 132	Poor	19	1.8	Slight	17.8	7.6	3.18	58
1699	CAT 19 A	AGS 114	Very Good	43.3	2.7		31.3	6.5	3.3	60
1700	CAT 45 A	AGS 153	Very Good	38	3.2	Severe	32.6	5.4	3.2	46
1701	CAT 48	AGS 156	Very Good	47	3	Slight	23.5	5.8	0.4	61
1702	CAT 925	EC 93406	Good	53	10	Slight	191	7.6	0	66
1703	CAT 934	EC 95296	Poor	55.4	6	Slight	119	8.8	0	64
1704	CAT 873 A	EC 37183	Poor	57	7	Slight	53	8.3	3.9	71
1705	CAT 875	EC 37752	Poor	36.4	5	Slight	57.6	6.1	4.96	65
1706	CAT 879	EC 39045	Poor	49	4.5	Slight	58.75	7.9	3.62	56
1707	CAT 1183	JS 79-9	Poor	26.8	4	Slight	44.8	8.1	3.96	56
1708	CAT 1066	IC 16568	Good	62.2	3.6	Moderate	37.2	5.7	2.52	58
1709	CAT 1044	IC 15759 A	Good	65.4	3	Slight	55	4.5	3.24	40
1710	CAT 30	AGS 127	Good	22.2	5	Slight	30.6	11.1	5.64	44
1711	CAT 37 B	AGS 134	Good	45	5.33333	Slight	197.667	8.4	0	59
1712	CAT 99 A	AGS 52	Very Good	62.6667	2.33333		19	7.6	0.64	57
1713	CAT 77	AGS 228	Very Good	54.25	3	Slight	37	9	1.98	57
1714	CAT 2122 B	EC 389160 B	Good	21	5	Slight	47.8	5.2	2.74	57
1715	CAT 2115 A	EC 389149 A	Poor	26.6667	5	Slight	77.3333	5.1	0	64
1716	CAT 2690	EC 481486	Poor	53.6	3.6	Slight	43.2	6.7	1.82	69
1717	CAT 2117 A	EC 389153 A	Poor	26.2	5.2	Slight	82.6	11.1	7.34	60
1718	CAT 2206 B	EC 396058 B	Poor	31.75	6		120.5	10.2	12.5	50
1719	CAT 2128 B	EC 389176 B	Poor	40	5	Slight	67	8.6	3.3	61
1720	CAT 124	AGS 83	Good	52	4.33333		39.3333	8.1	1.14	69
1721	CAT 126	AGS 88	Poor	49.3333	1.66667	Slight	20.6667	4.9	0.62	69
1722	CAT 130	AGS 92	Good	68	3.5		35.75	5.6	0.84	73
1723	CAT 2800	ASG 328	Good	25.6	3.8	Slight	22.6	22.9	9.04	39
1724	CAT 2219	EC 389151	Poor	40.25	3.8	Slight	64	9	1.54	55
1725	CAT 40	AGS 143	Good	68.6667	1.66667	Slight	28.3333	7.7	1.98	64
1726	CAT 8	AGS 104	Good	81.5	4.5	Moderate	37.3	6	2.8	69
1727	CAT 1	ACC 1026	Good	68.7	4.4	Slight	78.7	10.8	1.04	62
1728	CAT 9	AGS 105	Good	92.2	3.2	Slight	24.6	7.7	1.3	64
1729	CAT 59	AGS 168	Good	35.2	3.8		34.8	11.7	8.02	47
1730	CAT 60	AGS 170	Good	23.4	6.4	Slight	48.4	12.9	10.06	47
1731	CAT 119	AGS 75	Good	70.8	5	Moderate	55	6.9	0.36	54
1732	CAT 173	B 471	Very Good	65	4	Moderate	54	6.8	2.48	71
1733	CAT 161	B 252	Good	58	4.5		54.75	6.7	3.34	61
1734	CAT 137	AGS 99	Good	42.75	3.5	Slight	25.25	5.9	3.26	56
1735	CAT 144	AKSS 65	Good	57.2	3.8		25.6	11.1	3.82	57
1736	CAT 3354	EC 615155	Good	62.4	3	Slight	50.8	9.6	5.42	55
1737	CAT 3395 A	EC 606918	Good	61.75	5	Slight	47.25	6.1	1.8	62
1738	CAT 3392	EC 615193	Good	43.6	3.6	Slight	53.8	13.4	10.42	55
1739	CAT 3379	EC 615180	Poor	67.6	5.4	Severe	74.6	7.8	8.58	66
1740	CAT 3378	EC 615179	Poor			Slight		11.4	6.48	55
1741	CAT 3374	EC 615175	Poor	24	5	Slight	24		0	57
1742	CAT 3353	EC 615154	Very Good	42.2	0.8	Moderate	13.6	12	3.52	37
1743	CAT 3370	EC 615171	Good	36.75	7.5		130	12	5.2	52
1744	CAT 174	B 472	Good	48	5.5	Slight	39		0	63
1745	CAT 127	AGS 9	Good	44.4	3.6		48.8	6.9	1.76	71
1746	CAT 108	AGS 64	Good	66.6	4.8		27.4	9.5	2.02	67
1747	CAT 143	AKSS 63	Very Good	64.4	4.2	Moderate	41.2	8.1	2.02	64
1748	CAT 2032	EC 358009	Good	32.2	2.2	Slight	31	19.3	5.2	48
1749	CAT 2063	ICS 328/86,30050	Poor	28.8	6	Slight	55	9.2	5.02	64
1750	CAT 2052	GC 37	Poor			Slight		9.5	3.12	45
1751	CAT 2060	GC 86017-170N	Poor	33.6667	7	Slight	69.6667	8.3	0	58
1752	CAT 3366	EC 615167	Good	21	1.4	Slight	31.4	12.4	0	39
1753	CAT 3327	EC 615128	Very Good	63.6	2.8	Moderate	59.4	9.2	8.82	57
1754	CAT 3301	EC 589400	Good	60.8	4.4	Slight	69.6	9.4	10.24	51
1755	CAT 3309	EC 589409	Very Good	59.2	2.8	Moderate	55.2	8.7	7.18	55
1756	CAT 3308	EC 589408	Poor	39.6	3.8	Slight	67	5.5	1.22	72
1757	CAT 3399	EC 631513	Poor	30.5	6	Slight	96		0	54
1758	CAT 3400	EC 631514	Poor	28	6	Slight	62.5		0	64
1759	CAT 3390	EC 615191	Good	35	5.4	Slight	46.4	10.5	6.58	48
1760	CAT 3386	EC 615187	Very Good	72.8	4.6	Slight	47.4	10	8.18	56
1761	CAT 3383	EC 615184	Good	46	3.6	Slight	41.2	10.4	4.04	54
1762	CAT 1924	TGX 996-5 F	Good	57.5	2.5	Moderate	28.25	6.5	1.28	67
1763	CAT 801	EC 333897	Poor	76	6	Moderate	64.5	6.5	2.84	70
1764	CAT 975	GP 30	Very Good	70	3.5	Moderate	41	6.6	1.22	58
1765	CAT 978	GP 36	Good	59.5	5.5	Moderate	54	8.5	2.98	71
1766	BHATT YELLOW	BHATT YELLOW	Very Good	75.2	3.2	Slight	29.2	9.4	2.88	54
1767	BHATT BLACK KURSA	BHATT BLACK KURSA	Poor	79.25	5	Slight	72.5	6.9	3.62	69
1768	PCPGR BHATT 5566	PCPGR BHATT 5566	Very Good	58.8	2.4	Slight	35.4	7.6	2.16	51
1769	PAHADI KALA BHATT 3140	PAHADI KALA BHATT 3140	Good	78	3.75	Moderate	38	7.1	1.44	68
1770	PIPGR BHATT 5494	PIPGR BHATT 5494	Poor	57.4	2.6	Moderate	15.6	7.1	2.2	67
1771	PC 32	PC 32	Very Good	78	2	Moderate	27.25	5.9	1.86	59
1772	PS PB 33	PS PB 33	Good	58.25	4.75		27.75	7.1	2.48	70
1773	PS PB 31	PS PB 31	Very Good	57.8	3.8		41.2	7.1	5.06	55
1774	NSO 11	NSO 11	Very Good	49.8	3.6	Slight	33.6	7.5	4.36	55
1775	BIRSA SOYA 1	BIRSA SOYA 1	Very Good	46	4.4		32.8	10.3	4.98	51
1776	SRL 148	SRL 148	Poor	27	2.66667	Slight	22.5	9.6	0.9	51
1777	CAT 1538	SPC 173	Very Good	60	3.4	Moderate	43.8	6.8	3.64	57
1778	SOJA SAVANNH	SOJA SAVANNH	Poor	66	8.75	Moderate	77	6.6	6.94	65
1779	SREL 56 A	SREL 56 A	Very Good	51	4	Moderate	53.4	7.7	6.32	49
1780	SACXSON	SACXSON	Very Good	32.8	4.4	Slight	23.4	11	3.88	44
1781	BLACK BOLD	BLACK BOLD	Poor	52.2	3.6	Moderate	21.4	6.5	1.98	64
1782	BAUS 13	BAUS 13	Very Good	57	2.6	Moderate	31.6	7.9	2	55
1783	BAUS 32	BAUS 32	Very Good	54	2.4	Slight	26.6	8.7	2.24	56
1784	EPS 335 B2	EPS 335 B2	Good	76.8	4.2	Slight	49.4	6.9	3.28	60
1785	PK 1175	PK 1175	Very Good	37.6	3.2	Slight	40.6	9.8	5.88	47
1786	PK 726	PK 726	Poor	39.6	4.4		53.2	7.4	2.82	64
1787	WT 185	WT 185	Poor	57.2	5.8	Severe	46.2	5.6	2.5	80
1788	WT 4	WT 4	Poor	66	5	Moderate	35.6	6.2	2.24	63
1789	PSPB 47	PSPB 47	Very Good	57.4	4.4	Moderate	46.6	7.3	6.6	62
1790	WT 94	WT 94	Very Good	54.6	5.6		65.6	7.9	3.78	63
1791	CAT 1951	VGM 20	Poor	29.6	3.2	Slight	36.8	9.7	2.76	57
1792	CAT 1962	WEBER (6)	Poor	49.4	3.6	Slight	32.6	7.3	4	67
1793	CAT 1913	TGX 93-36 E	Good	65.8	4	Moderate	39.6	7.2	5.02	62
1794	CAT 1908	TGX 863-2 C	Good	46.6	2.6		17.6	11.6	3.86	42
1795	CAT 1907	TGX 863-26 F	Poor	37.8	4.2		43.2	6.8	4.56	63
1796	CAT 1942	V 55	Poor	56.6	6	Slight	95.2	9.3	3.14	64
1797	CAT 1958	VLS 12	Very Good	88.4	5	Moderate	74.6	9.8	14.76	56
1798	PS 1421	PS 1421	Poor	24.4	3.2		26	8.4	0	62
1799	PS 1359	PS 1359	Poor	23.25	4	Slight	36.25	7.5	2.24	53
1800	PS 1479	PS 1479	Very Good	40	3.5		25	10.7	4.98	51
1801	PK 1133	PK 1133	Poor	22	4	Slight	34		0	75
1802	PS 1382	PS 1382	Poor	26	6	Slight	37	10.7	0	52
1803	PS 1420	PS 1420	Poor	29	3.66667	Slight	30	7.6	1.24	64
1804	UPSM 903	UPSM 903	Poor	56.2	6.2	Slight	34	5.1	1.78	72
1805	UPSM 863	UPSM 863	Very Good	24.25	3.5		27.75	9.7	3.66	53
1806	UPSM 889	UPSM 889	Poor	72.5	6	Slight	63.5	5.7	4.42	64
1807	UPSM 858	UPSM 858	Poor	49	5.5	Slight	69.5	6.2	0	73
1808	UPSM 862	UPSM 862	Good	63	4.4	Slight	51.4	6.3	2.7	66
1809	NRC 59	NRC 59	Good	53.8	2.6	Slight	30	5.9	2.96	65
1810	NRC 61	NRC 61	Poor	67.25	4	Moderate	36.25	4.8	0.86	65
1811	DAVIS	DAVIS	Poor	32.5	4.75	Slight	38.75	11.7	0	52
1812	PRAB 2	PRAB 2	Good	52.25	5		46	9.2	5.16	52
1813	GUMMA LOCAL PCR 3230	GUMMA LOCAL PCR 3230	Very Good	69.4	3.6	Moderate	81.2	9.6	5.34	54
1814	GUMMA LOCAL PCR 3229	GUMMA LOCAL PCR 3229	Very Good	45.6	3.8	Slight	34.6	15.3	7.22	48
1815	CAT 3331	EC 615132	Good	53.25	5.25	Slight	27	9.4	0	56
1816	CAT 3338	EC 615139	Good	64	3.25	Slight	49.25	8.3	0.26	56
1817	CAT 3339	EC 615140	Poor	58.5	7.75	Slight	54.5	5.9	0	67
1818	UPSM 662	UPSM 662	Poor	58.6	5		45.2	6.2	2.88	64
1819	UPSM 679	UPSM 679	Good	55.6	4		57.4	8.6	2.78	66
1820	UPSM 653	UPSM 653	Poor	66.8	3.4	Moderate	37.8	5.4	0.84	67
1821	UPSM 657	UPSM 657	Poor	77.5	5	Slight	70.5	5.4	3.38	63
1822	UPSM 670	UPSM 670	Very Good	68	5.4	Moderate	60.4	9.4	6.18	66
1823	UPSM 445	UPSM 445	Good	73.75	4.25	Moderate	57.75	7.8	6.26	64
1824	UPSM 600	UPSM 600	Poor	77.8	3.8	Slight	41.6	9.2	0	70
1825	UPSM 640	UPSM 640	Poor	76	4.6	Slight	55.4	6.8	1.38	68
1826	UPSM 655	UPSM 655	Good	81.5	2.75	Moderate	30.75	6.9	0.96	63
1827	UPSM 695	UPSM 695	Good	70.2	6.4	Moderate	104.8	5.9	9.42	68
1828	UPSM 1094	UPSM 1094	Very Good	79.8	4.4		89.4	8.4	9.62	71
1829	UPSM 1096	UPSM 1096	Very Good	81.2	5		66.8	7.9	6.3	71
1830	UPSM 1096 A	UPSM 1096 A	Very Good	84.6	3.8	Slight	77.6	7.4	7.2	41
1831	UPSM 1099	UPSM 1099	Poor	67.4	5	Slight	79	8.3	6.5	69
1832	UPSM 1097	UPSM 1097	Poor	55.4	4.6		41.8	7.9	2.06	71
1833	UPSM 1034	UPSM 1034	Poor	57.25	6.75	Severe	137.25	5.8	9.7	71
1834	UPSM 1058	UPSM 1058	Very Good	90	4.2	Moderate	64.2	5.6	3.04	67
1835	UPSM 1022	UPSM 1022	Poor	68.8	3	Moderate	42	5.5	2.14	64
1836	UPSM 1024	UPSM 1024	Poor	52.2	3.4	Slight	52.2	6	0	67
1837	UPSM 1070	UPSM 1070	Good	70	3	Slight	36.6667	6.7	2.4	68
1838	UPSM 1078	UPSM 1078	Good	81.4	3.4	Moderate	32.6	6.4	1.88	64
1839	UPSM 1087	UPSM 1087	Good	70.5	2.75	Slight	39	6.8	1.9	68
1840	PLSO 48 B	PLSO 48 B	Good	66.6	1	Moderate	50	7.9	5.02	71
1841	PLSO 659	PLSO 659	Poor	28.4	3.4	Slight	23.4	9.3	2.84	48
1842	PLSO 90 B	PLSO 90 B	Very Good	46	3	Slight	28.6	9.1	2.86	54
1843	SL 983	SL 983	Very Good	52.6	3.2		34.2	8.8	4.02	53
1844	UPSM 206	UPSM 206	Poor	65.6	3.4	Moderate	26	6.5	1.12	71
1845	UPSM 284	UPSM 284	Poor	63	4	Moderate	44.6	6.2	3.06	68
1846	UPSM 213	UPSM 213	Poor	63.4	4.8	Moderate	54.6	5.3	3.82	62
1847	UPSM 314	UPSM 314	Poor	72.4	5	Moderate	87.4	5	1.1	66
1848	UPSM 377	UPSM 377	Good	59	3.2	Slight	52.4	6.7	6.1	64
1849	TS 94	TS 94	Good	39	2.8		26.8	8.7	3.76	51
1850	TS 99-76	TS 99-76	Good	69.2	3	Slight	31	7.3	2.14	64
1851	TS 98-1	TS 98-1	Good	42.8	2.8		42.4	9.2	4.92	52
1852	UPSM 127	UPSM 127	Poor	70	3.5	Moderate	46.5	6.4	3.32	70
1853	UPSM 122	UPSM 122	Poor	65	5	Severe	36.6667		0	71
1854	UPSM 121	UPSM 121	Poor	69	4.2	Slight	43.6	7.5	2.98	69
1855	UPSM 795	UPSM 795	Good	72.8	3.8	Slight	62.8	7.7	5.48	66
1856	UPSM 700	UPSM 700	Poor	57.5	3.75	Moderate	35.75	6.1	1.4	62
1857	UPSM 719	UPSM 719	Poor	67.2	6.2	Moderate	85	5.8	1.74	69
1858	UPSM 725	UPSM 725	Poor	62.6	2.8	Moderate	36.2	6.1	2.32	69
1859	UPSM 734	UPSM 734	Poor	64.75	4.5	Moderate	31	8.9	1.86	71
1860	UPSM 780	UPSM 780	Poor	67	4.33333	Moderate	52.6667	7.4	2.18	67
1861	UPSM 783	UPSM 783	Poor	66	4.6	Moderate	70	5.1	2.6	69
1862	UPSM 784	UPSM 784	Poor	58.2	4.2	Slight	22.8	6	1.34	68
1863	UPSL 786	UPSL 786	Poor	63.6	4.6	Slight	39	6.5	3.82	64
1864	UPSM 788	UPSM 788	Poor	73.3333	5	Moderate	64	6.5	2.1	71
1865	UPSM 789	UPSM 789	Good	87.8	3.8	Slight	72.6	8.2	7.54	73
1866	CAT 1405	PI 60269	Very Good	75.6	4.4	Moderate	76.4	9	6.56	64
1867	CAT 1418	PK 474	Very Good	43.2	3.2	Slight	31.8	9.3	2.54	49
1868	CAT 1561	TGX 1051-1 E	Poor	47.2	3.4		106.2	8.7	9.86	59
1869	CAT 1566	TGX 1073-30 A	Poor	45.2	3.2		44	5.8	3.82	59
1870	CAT 1563	TGX 1073-18 E	Very Good	60.8	2.4	Moderate	31.4	7	2.72	64
1871	UPSM 534	UPSM 534	Good	55	3.4		50	9.5	5.58	55
1872	UPSM 579	UPSM 579	Good	67.5	5.25	Moderate	93.75	6.6	0.58	66
1873	UPSM 586	UPSM 586	Poor	59.8	7.6	Slight	128.8	6.7	0	68
1874	UPSM 594	UPSM 594	Poor	57	5.5	Slight	52.5	6.2	1.3	75
1875	UPSM 593	UPSM 593	Poor	63	6	Slight	95		0	72
1876	UPSM 1125	UPSM 1125	Good	41.8	3.8		46.4	8.4	5.1	54
1877	UPSM 1120	UPSM 1120	Very Good	79.2	3.6	Slight	64	8.2	7.2	41
1878	UPSM 1253	UPSM 1253	Good	74.4	3	Moderate	40.4	7.3	1.94	62
1879	UPSM 1239	UPSM 1239	Poor	81.4	4.2	Moderate	60.6	5.7	0	72
1880	UPSM 181	UPSM 181	Poor	63	5.75	Slight	53.25	7.2	3.56	63
1881	UPSM 102	UPSM 102	Very Good	82.4	2.2	Moderate	31.6	8.2	2.86	64
1882	UPSM 116	UPSM 116	Very Good	62.75	3	Slight	59.25	7.9	4.08	73
1883	UPSM 117	UPSM 117	Very Good	74.75	4.5	Slight	69.25	7.9	5.56	72
1884	UPSM 115	UPSM 115	Very Good	82	3	Moderate	28	7.2	1.24	74
1885	UPSM 118	UPSM 118	Good			Moderate		7	4.38	64
1886	UPSM 199	UPSM 199	Very Good	56	5.25	Moderate	40	7.9	2.34	68
1887	UPSM 57	UPSM 57	Very Good	81.6	4	Moderate	40.6	8.6	2.84	70
1888	UPSM 77	UPSM 77	Good	74	3.4	Moderate	36	7.8	2.54	64
1889	UPSM 9	UPSM 9	Poor	67	5.6	Slight	51.6	7	2.8	69
1890	UPSM 20	UPSM 20	Poor	63.3333	3.66667	Slight	29.3333	6.9	1.02	68
1891	UPSM 42	UPSM 42	Good	77	4.4	Slight	51.4	8.8	3.22	64
1892	UPSM 52	UPSM 52	Poor	67.8	3.4	Slight	39.8	6.8	2.06	67
1893	UPSM 55	UPSM 55	Poor	74	3.8	Moderate	50	7.1	4.9	66
1894	UPSL 706	UPSL 706	Good	66.25	4.5	Slight	45	7.9	2.1	64
1895	UPSL 767	UPSL 767	Poor	68.5	3.25	Moderate	34.25	7.3	2.24	68
1896	UPSL 769	UPSL 769	Poor	72.8	3.8	Moderate	51.4	6.9	5.5	67
1897	UPSL 781	UPSL 781	Very Good	74.6	3.6	Moderate	25	6.3	2.68	69
1898	UPSL 788	UPSL 788	Poor	75.25	5	Slight	66.5	7.7	5.62	63
1899	UPSL 782	UPSL 782	Good	82	2.6	Moderate	30.6	7.2	3.46	63
1900	UPSL 796	UPSL 796	Good	76.2	2.8	Moderate	43.2	6.7	5.18	64
1901	UPSL 263	UPSL 263	Poor	69.6	3.4	Slight	56.6	7.9	1.86	72
1902	UPSL 268	UPSL 268	Good	75.5	2.25	Moderate	46.75	7.7	4.52	41
1903	CAT 1444	PLSO 40	Poor	50.75	4.75		71.25	6.6	4.12	70
1904	PK 1220	PK 1220	Poor	23.6	4.6	Slight	30.4	8.2	1.12	54
1905	PK 1005	PK 1005	Good	47	3.6	Slight	40.6	9	5.4	71
1906	PK 1024	PK 1024	Poor	32	7.5	Slight	62	8.8	0	57
1907	DL 5010	DL 5010	Good	65.25	4.5	Slight	31.25	8	2.2	70
1908	CAT 2268	DOKO	Poor	41.5	4.5		52	9	6.34	67
1909	CAT 1369	PI 209577	Good	78.4	2.4	Slight	52.6	6.1	0.96	57
1910	CAT 1320	P 315	Very Good	81.5	3.5	Slight	33.75	7.2	0.84	64
1911	CAT 1315	P 239	Very Good	52.2	4.2		51.8	8.7	6.48	55
1912	CAT 1393	PI 307871	Poor	52.5	3.5		50.25	6.8	0	68
1913	CAT 1239	M 1313	Good	79	3.33333	Moderate	57.3333	6.3	2.12	64
1914	CAT 1205	KB 19	Good	63.2	3.4		28	5.73	1.34	64
1915	CAT 1226	L 418	Good	77.2	3.4	Moderate	44	7.4	0.84	57
1916	CAT 1227	L 425	Very Good	71.4	4.2	Moderate	50.8	6.3	1.3	64
1917	UPSL 72	UPSL 72	Good	88	3.2	Slight	41.6	6.7	3.64	63
1918	CAT 1273	N 23 B	Poor			Slight		7.6	0	48
1919	CAT 1273 B	N 23 B	Good	74.8	4	Moderate	46.6	7.7	3.52	64
1920	CAT 1333	P 596	Very Good	50.8	3.6		23.8	9.2	2.26	48
1921	CAT 1245	M 661	Good	25.6	4.6	Moderate	26	7	1.22	63
1922	CAT 1270	MONGOLIA	Very Good	69.5	3.75	Slight	27	6.3	1.66	60
1923	CAT 1264	MACS 56	Good	66.2	2.2	Moderate	21.8	6.6	2.54	64
1924	CAT 240	DCB 195	Good	73.6	4.8	Moderate	38.8	7.7	2.18	64
1925	CAT 282	EC 102322	Good	84.8	2.8	Slight	41	7.6	1.18	61
1926	CAT 232	DB 1587	Good	76.4	2.2	Slight	46.8	7.3	4	59
1927	CAT 270	DS 76-1-139-2	Very Good	64	3.5	Moderate	47	9	1.44	56
1928	UPSL 750 B	UPSL 750 B	Good	62.75	3.75	Slight	35	7.1	2.22	70
1929	UPSL 77	UPSL 77	Very Good	81.75	3.25	Slight	28.25	6.8	1.2	66
1930	UPSL 80	UPSL 80	Good	49.4	5.8		36.6	5.8	0.16	64
1931	CAT 274	EC 100772	Very Good	52	4	Slight	41	8.7	1.96	66
1932	CAT 227 A	DAK 2	Good	57.8	4.8	Severe	37	4.5	1.84	48
1933	CAT 296	EC 109546	Poor	65.6667	5.66667		72.3333	5.8	4.22	73
1934	CAT 281	EC 100804	Very Good	63.4	4.6	Slight	48.8	6.6	2.64	65
1935	CAT 276	EC 100786	Very Good	75.2	4.2	Moderate	49	7	2.24	62
1936	CAT 277	EC 100788	Very Good	86	3	Moderate	18	7.2	2.28	59
1937	CAT 1351	PI 171443	Good	80.2	3	Moderate	36.6	7.8	1.82	66
1938	CAT 1322	P 352	Poor	27	3.8	Slight	25.8	6.7	0	50
1939	CAT 1282	NELIYA 5	Very Good	80.4	3.8	Slight	39.6	6.1	2.26	66
1940	CAT 1781	TGX 814-46 F	Good	57.4	3	Moderate	34	9.2	3.42	67
1941	CAT 252	DS 143	Very Good	76.8	2.4	Slight	53.8	8.7	3.68	54
1942	CAT 1287	NKG 36	Good	29	4.2	Slight	53.6	7.4	3.64	60
1943	CAT 1212	KHSB 24	Good	66.2	1.8	Slight	26.6	6.4	1.66	67
1944	CAT 1298	NP 4	Good	70.8	2	Slight	26.4	6.5	1.62	53
1945	CAT 1700 A	TGX 573-97 E	Good	62.6	5.6		50.6	8.9	3.24	64
1946	CAT 1700 B	TGX 573-97 E	Poor	54.4	7.2		87.4	7.4	4.36	67
1947	CAT 1616	TGX 298-7 E	Good	73.6	3.6	Moderate	46	6.8	3.76	68
1948	CAT 1621	TGX 302-12 D	Good	58.6	4.8	Moderate	52.2	8	3.14	67
1949	CAT 1603	TGX 293-46 E	Poor	47.4	4	Slight	69	9.1	2	55
1950	CAT 1605	TGX 293-47 E	Good	68.4	4.4	Moderate	36.6	8	2.98	66
1951	CAT 1632	TGX 302A-68 F	Good	64.8	6	Slight	57.6	7.3	2.66	56
1952	CAT 1628	TGX 302A-12 F	Good			Slight		6.5	4.1	69
1953	CAT 1601	TGX 293-41 E	Very Good	57.2	2.2		50.2	9.2	3.02	60
1954	CAT 1292	NKG 49	Good	50.8	5	Slight	70	6.8	5.38	59
1955	CAT 1741	TGX 803-99 E	Good	70.4	3.8	Moderate	48.4	6.5	5.78	57
1956	CAT 1728	TGX 802-100 F	Very Good	53.8	2.2		47.6	7.6	4.46	56
1957	CAT 1740	TGX 803-99 D	Very Good	57.2	2.8	Moderate	31.6	6.3	5.78	67
1958	CAT 1765	TGX 814-26 D	Very Good	44.6	1.6		21.4	8.9	2.22	59
1959	CAT 700 A	EC 309533	Good	41	2.4	Slight	28	7.6	2.28	58
1960	CAT 700 B	EC 309533	Poor	64	4.5	Severe	73.5		0	75
1961	CAT 792	EC 333888	Poor	27.2	5.4	Slight	65.8	10.1	10.84	61
1962	CAT 774	EC 333870	Good	62.6	4	Slight	37.4	7.2	3.26	68
1963	CAT 735	EC 325100	Good	58.6	5		62.8	9.2	4.52	57
1964	CAT 616	EC 274701	Good	59.8	1.4		25.2	8.9	1.62	65
1965	CAT 761	EC 333856	Poor	34.5	5.75	Slight	83.25	4.3	4.38	57
1966	CAT 755	EC 329157	Good			Slight		14	5.68	43
1967	CAT 1657	TGX 342-536 D	Poor	52.3333	3.66667	Slight	51	7.4	2.9	66
1968	CAT 1639	TGX 315-024 D	Poor	59.2	3.6	Slight	27.2	7.4	1.44	66
1969	CAT 635	EC 287457	Good	64	3.4	Moderate	33.2	7.3	2.6	64
1970	CAT 633	EC 287454	Good	46.4	3.6		36.8	9.5	5.98	58
1971	CAT 639	EC 287464	Good	58.2	4.2	Slight	45.2	7.4	3.64	66
1972	CAT 637	EC 287460	Good	46.8	3	Slight	26.6	7.1	2.52	64
1973	CAT 686	EC 309510	Good	69.4	5.8	Moderate	67.6	6.4	0.26	61
1974	CAT 682	EC 309504	Good	55.4	2	Slight	27.8	6.3	1.98	65
1975	CAT 619	EC 274713	Very Good	58.5	3.25	Slight	64.75	7.9	4	56
1976	CAT 614	EC 274683	Very Good	80.6667	3.33333	Slight	25	5.5	0.6	66
1977	CAT 1654	TGX 342-375	Good	67.6	3.8	Slight	49.4	6.7	3.06	68
1978	CAT 1780	TGX 814-46 E	Good	55.25	2.75	Slight	16.5	6	2.72	71
1979	CAT 1786	TGX 814-78 D	Very Good	60.6	3	Slight	28.8	6.8	3.18	62
1980	CAT 1774	TGX 814-44 D	Very Good	68.8	2.6	Slight	23.4	6.3	0.48	73
1981	CAT 1782	TGX 814-54 D	Good	59	2.75	Slight	31.75	6.1	0.74	72
1982	CAT 1959	VLS 13	Good	59.6	1.8	Moderate	41.4	7.9	6.42	60
1983	CAT 347	EC 18309	Good	59.25	3.25	Slight	33.25	5.3	1.44	55
1984	CAT 621	EC 274719	Very Good			Slight		6.5	2.26	64
1985	CAT 620	EC 274717	Very Good	36.5	3.75		30	5.7	2.68	66
1986	CAT 618	EC 274712	Good			Slight		6.8	2.16	66
1987	CAT 617	EC 274711	Good	53	3.8	Slight	59.2	5.4	4.5	52
1988	CAT 651	EC 291393	Good	70.8	2.8	Slight	52	9.4	2.82	50
1989	CAT 664	EC 291456	Very Good	43.8	2.6	Slight	32.4	9.5	3.42	50
1990	CAT 602	EC 251871	Very Good	73.4	2	Moderate	30.2	9.8	1.5	63
1991	CAT 572	EC 251504	Very Good	52.2	5.8	Slight	49	6.5	2.44	55
1992	CAT 587 B	EC 251762	Good	50	3.4	Severe	46.6	3.7	0	39
1993	PS 1325	PS 1325	Poor	40.5	4		32.5		0	58
1994	CAT 597	EC 251865	Poor	58	5.33333	Slight	50.3333	5.2	2.34	58
1995	CAT 645	EC 287479	Good	54	3.25	Slight	28.75	6.9	1.18	69
1996	CAT 609	EC 2579	Good	78.75	4.5	Moderate	30.75	7.2	1.96	64
1997	CAT 604	EC 251874	Good	37.8	4.2	Slight	43.6	5.6	2.38	75
1998	G 2122	G 2122	Good	35.8	3.4	Slight	30.6	7.6	1.5	58
1999	G 2130	G 2130	Good	74.8	5.4	Slight	75	11.3	10.72	73
[truncated: 377 more rows]
